# Supplementary material for: An easy route to synthetic analogues of radicamine B, codonopsine and codonopsinine from d-mannitol
Source: Royal Society of Chemistry journal article supplement (doi:10.1039/c4ob00503a), 2014-01-01
Supplement: c4ob00503a1.pdf [file c4ob00503a1.pdf]

## **An easy route to Synthetic Analogues of Radicamine B, Codonopsine and Codonopsinine from D-Mannitol**

Suresh Dharuman, Ashok Kumar Palanivel and Yashwant. D. Vankar

Department of Chemistry, Indian Institute of Technology Kanpur 208 016, India

Fax: 0091-512-259 0007; E mail: [vankar@iitk.ac.in](mailto:vankar@iitk.ac.in)

1. Scanned copy of  $^1\text{H}$ ,  $^{13}\text{C}$  and 2D-NMR Spectra.....S2-S64

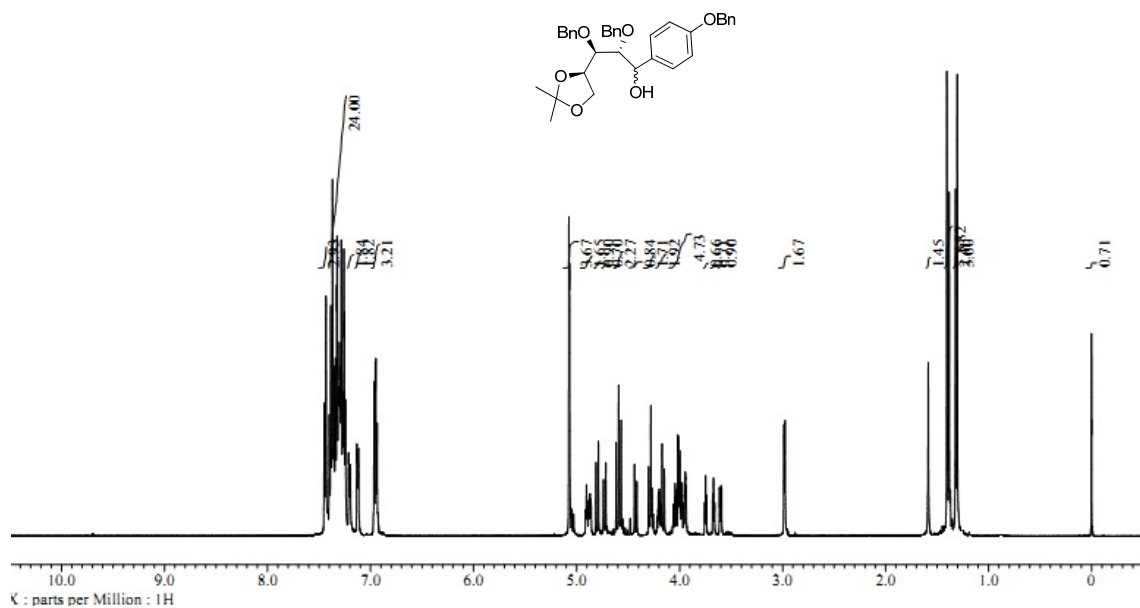

**Figure 1.1:**  $^1\text{H}$  NMR (500 MHz,  $\text{CDCl}_3$ ) Spectrum of Compound 7

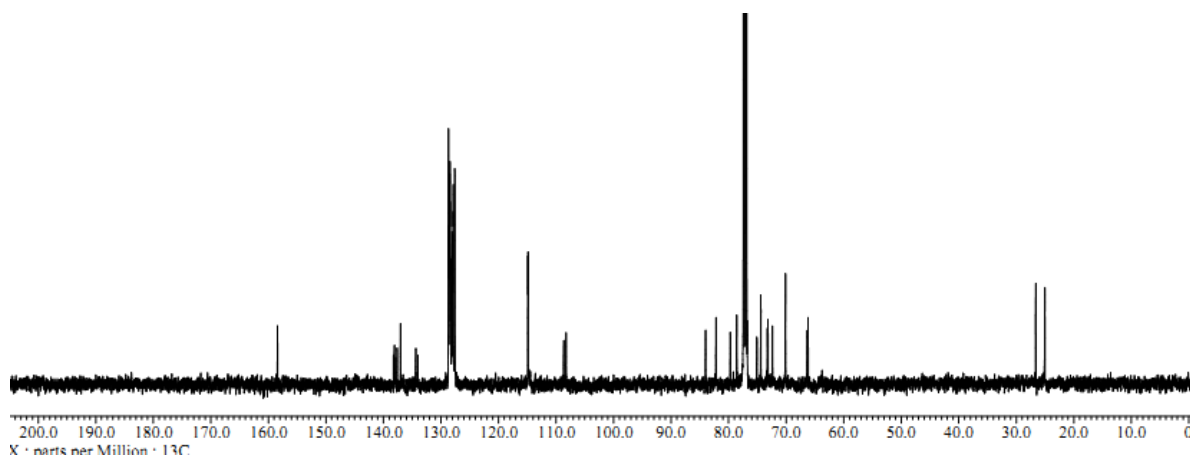

**Figure 1.2:**  $^{13}\text{C}$  NMR (125 MHz,  $\text{CDCl}_3$ ) Spectrum of Compound 7

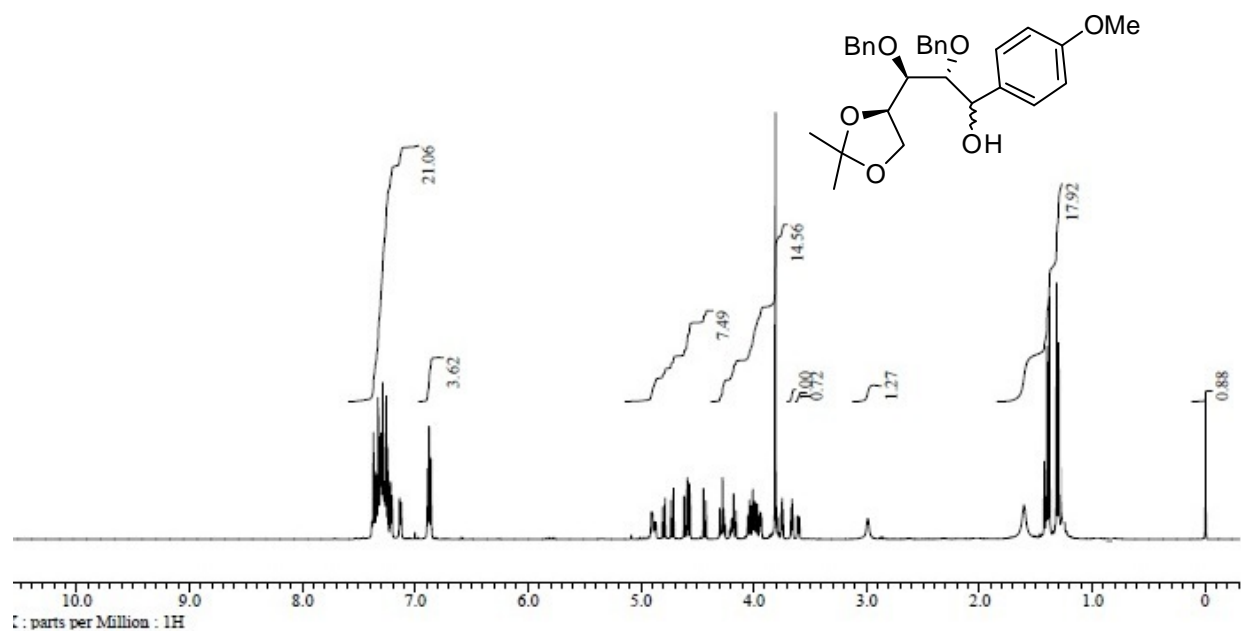

**Figure 2.1:** <sup>1</sup>H NMR (500 MHz, CDCl<sub>3</sub>) Spectrum of Compound 15

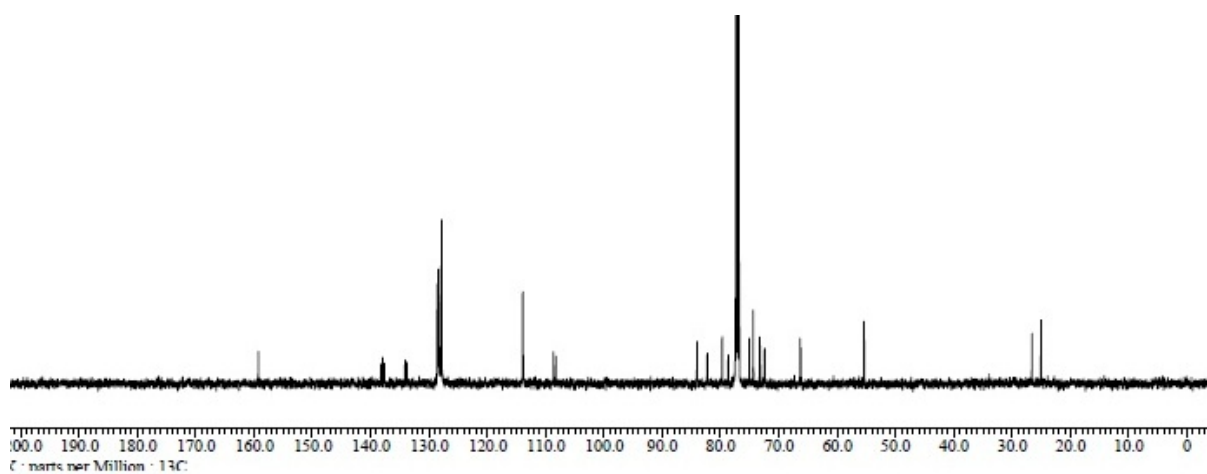

**Figure 2.2:** <sup>13</sup>C NMR (125 MHz, CDCl<sub>3</sub>) Spectrum of Compound 15

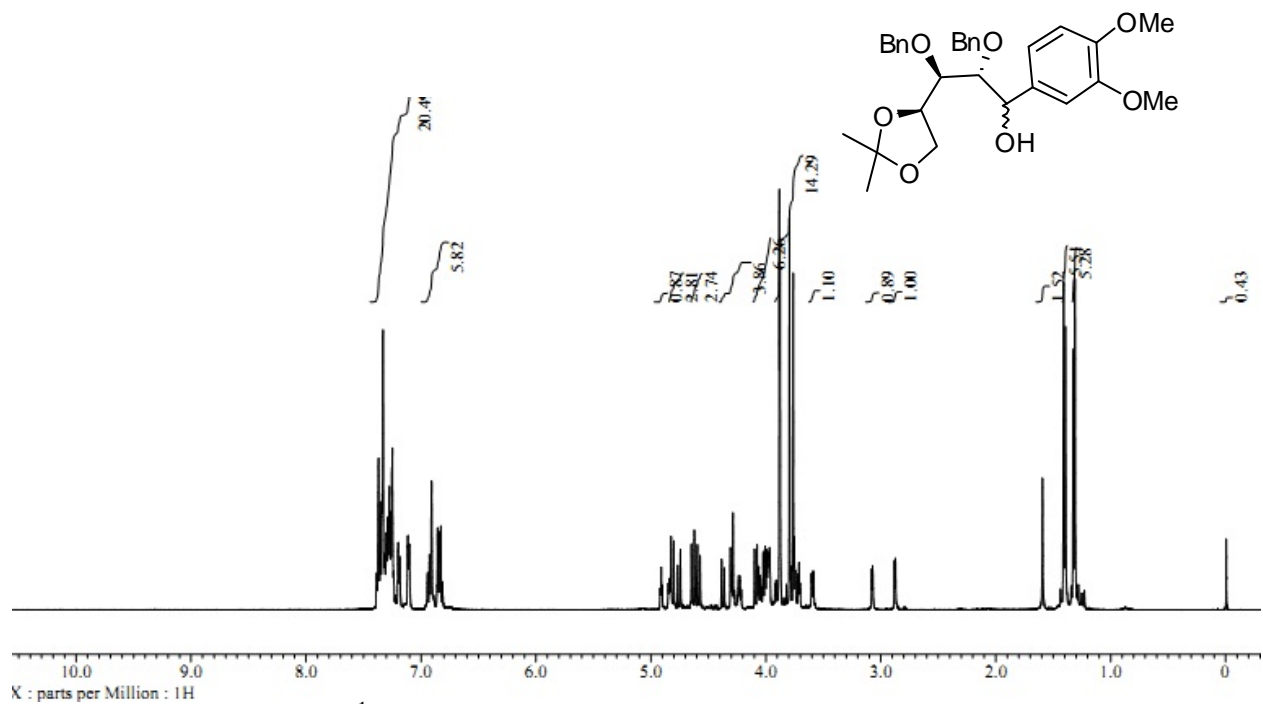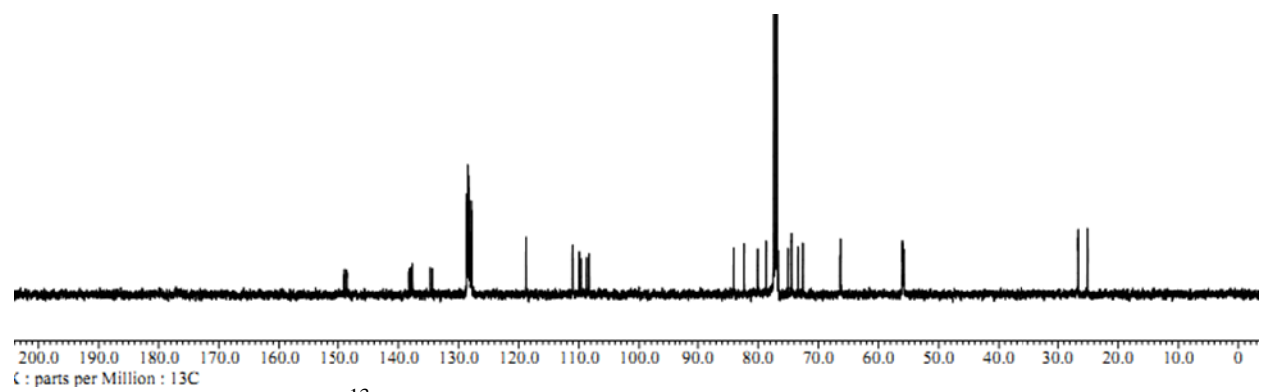

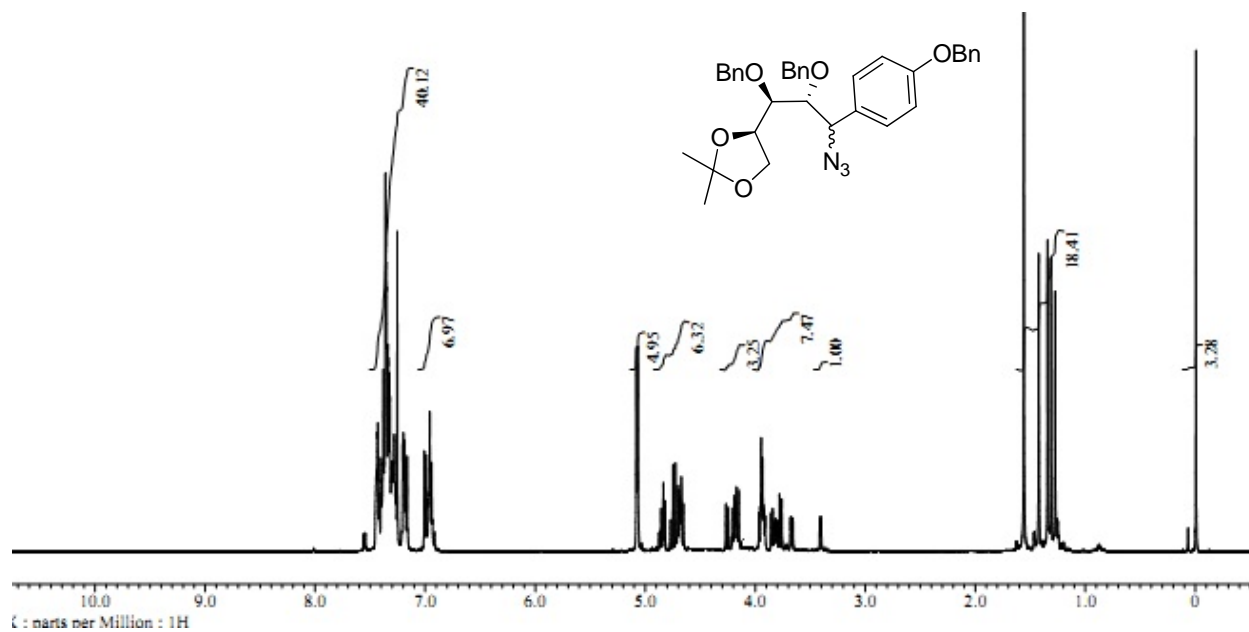

Figure 4.1:  $^1\text{H}$  NMR (500 MHz,  $\text{CDCl}_3$ ) Spectrum of Compound **8a**

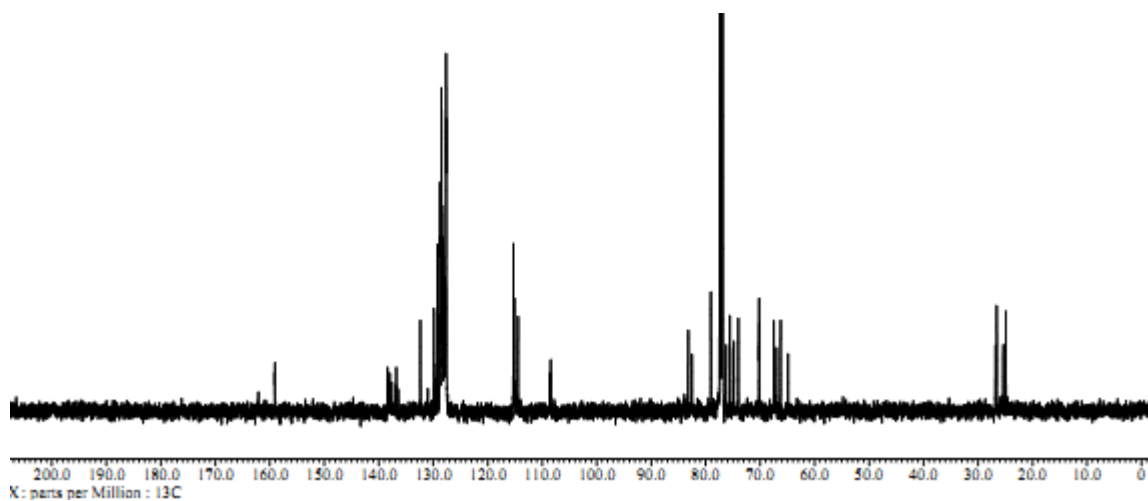

Figure 4.2:  $^{13}\text{C}$  NMR (125 MHz,  $\text{CDCl}_3$ ) Spectrum of Compound **8a**

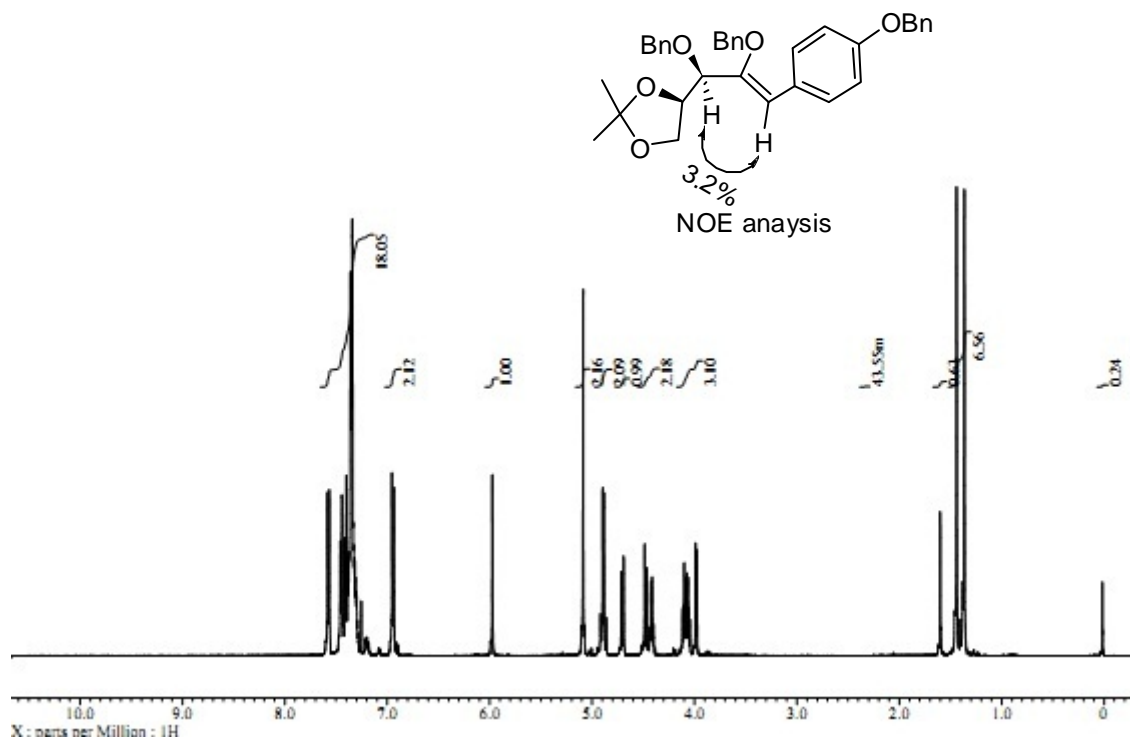

**Figure 5.1:** <sup>1</sup>H NMR (500 MHz, CDCl<sub>3</sub>) Spectrum of Compound **8b**

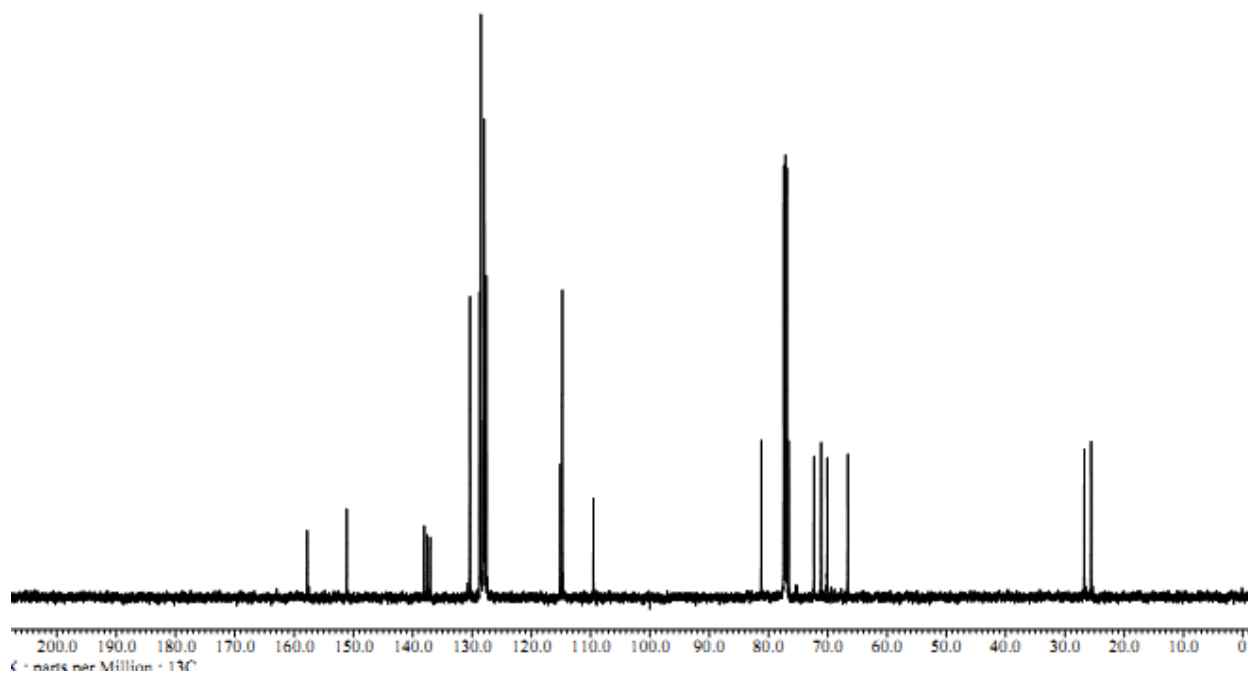

**Figure 5.2:** <sup>13</sup>C NMR (125 MHz, CDCl<sub>3</sub>) Spectrum of Compound **8b**

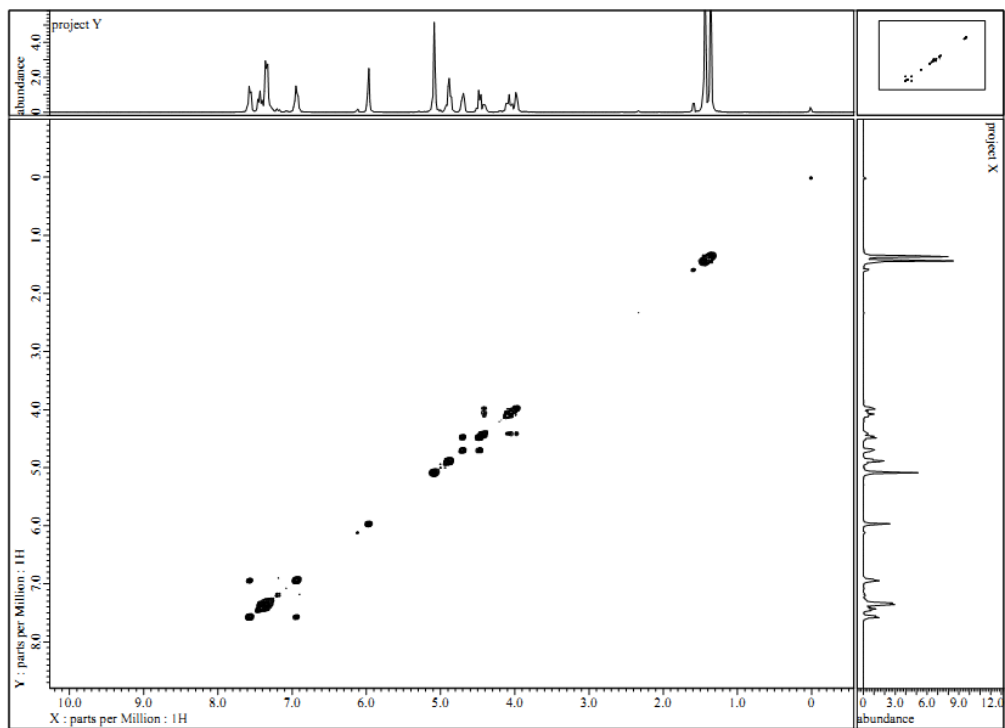

Figure 5.3:  $^1\text{H}$ - $^1\text{H}$  COSY Spectrum of Compound **8b**

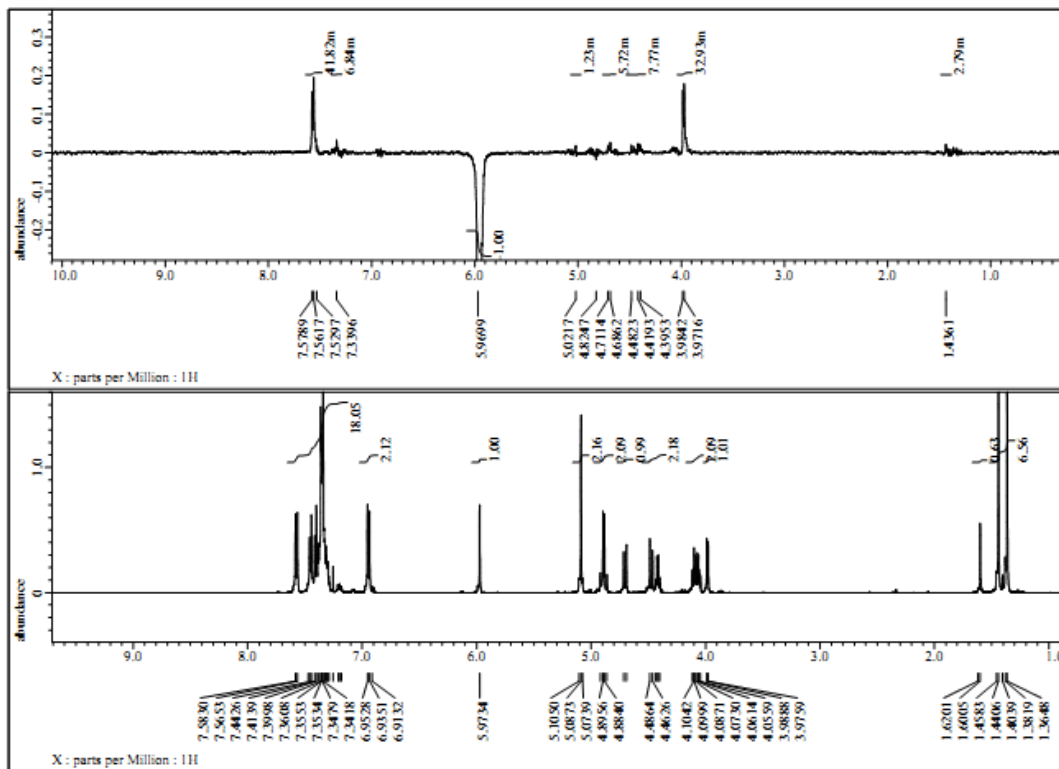

Figure 5.4: NOE irradiation of Vinylic proton of Compound **8b**

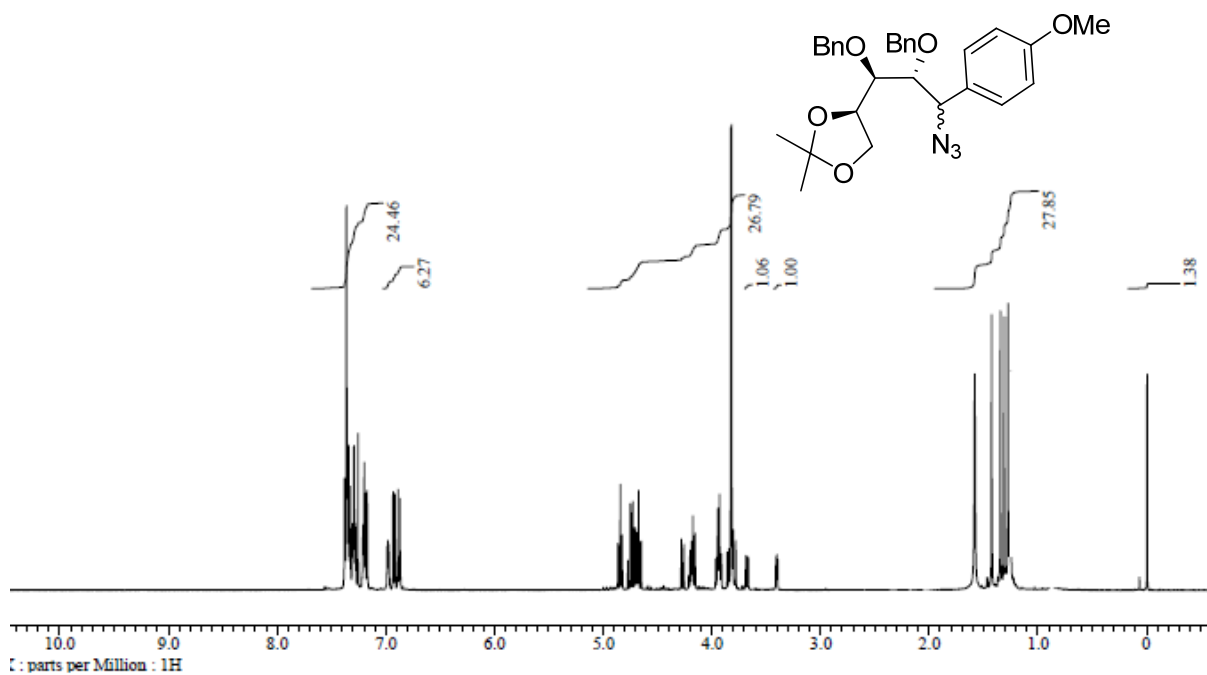

**Figure 6.1:**  $^1\text{H}$  NMR (500 MHz,  $\text{CDCl}_3$ ) Spectrum of Compound 17a

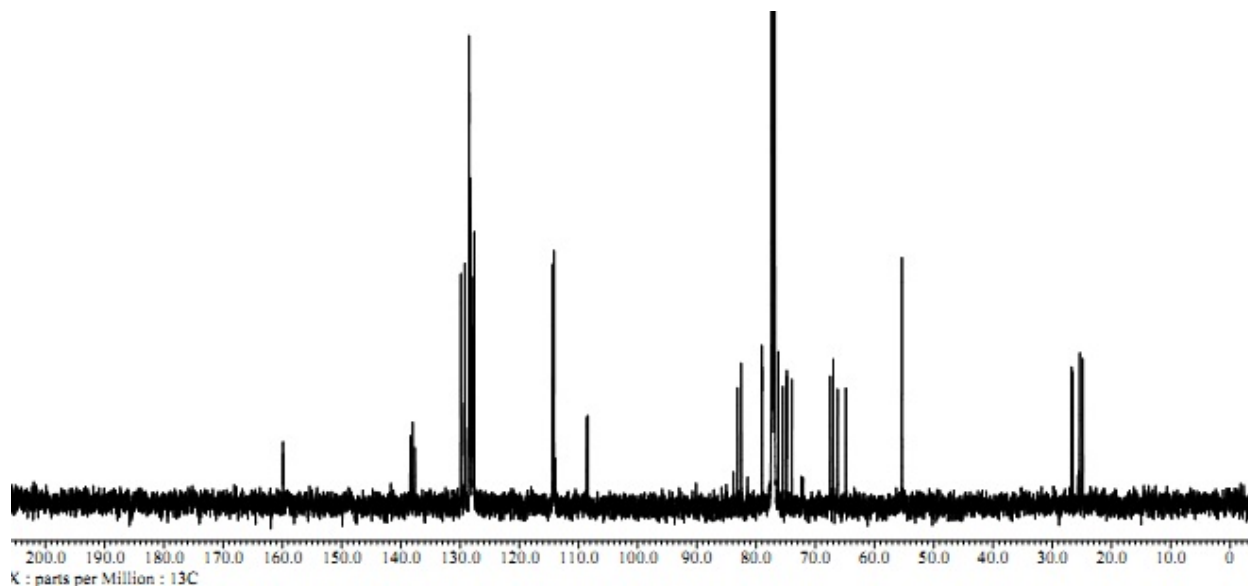

**Figure 6.2:**  $^{13}\text{C}$  NMR (125 MHz,  $\text{CDCl}_3$ ) Spectrum of Compound 17a



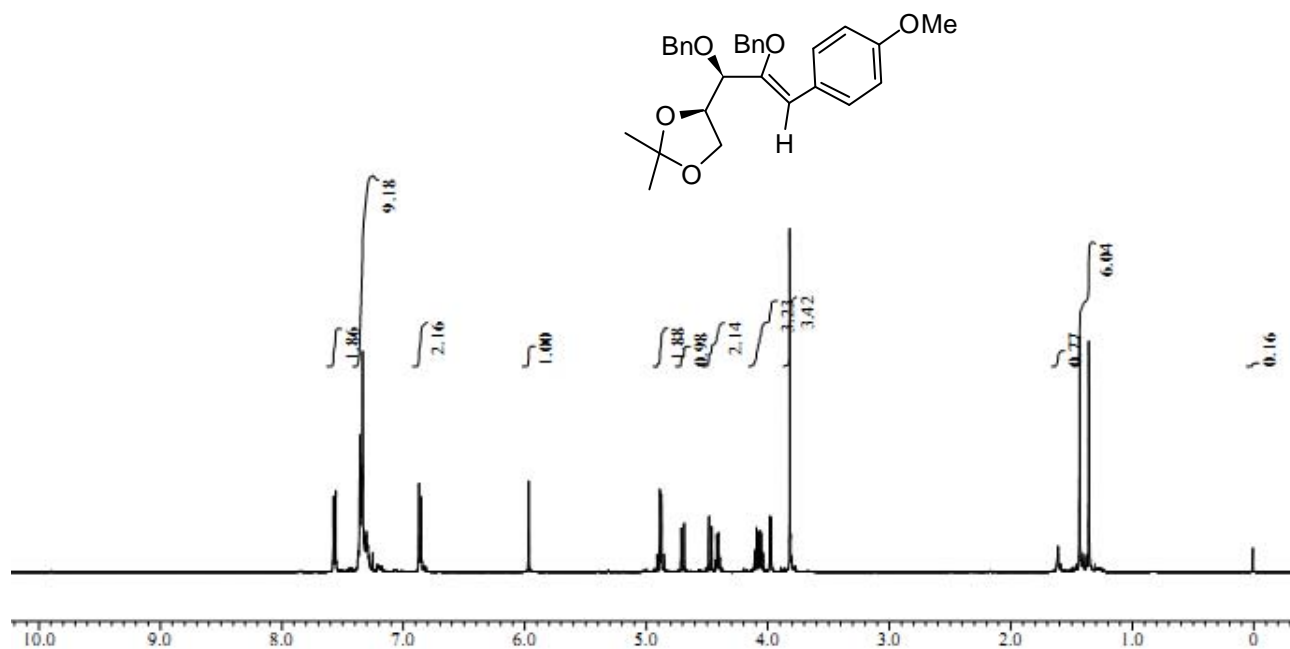

**Figure 7.1:** <sup>1</sup>H NMR (500 MHz, CDCl<sub>3</sub>) Spectrum of Compound 17b

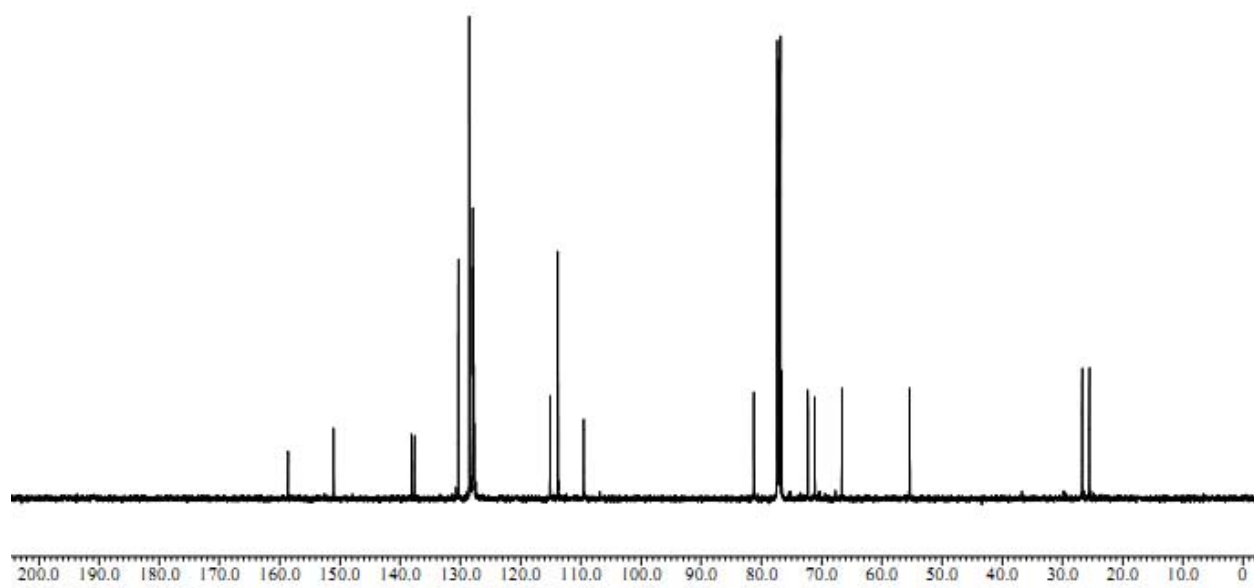

**Figure 7.2:** <sup>13</sup>C NMR (125 MHz, CDCl<sub>3</sub>) Spectrum of Compound 17b

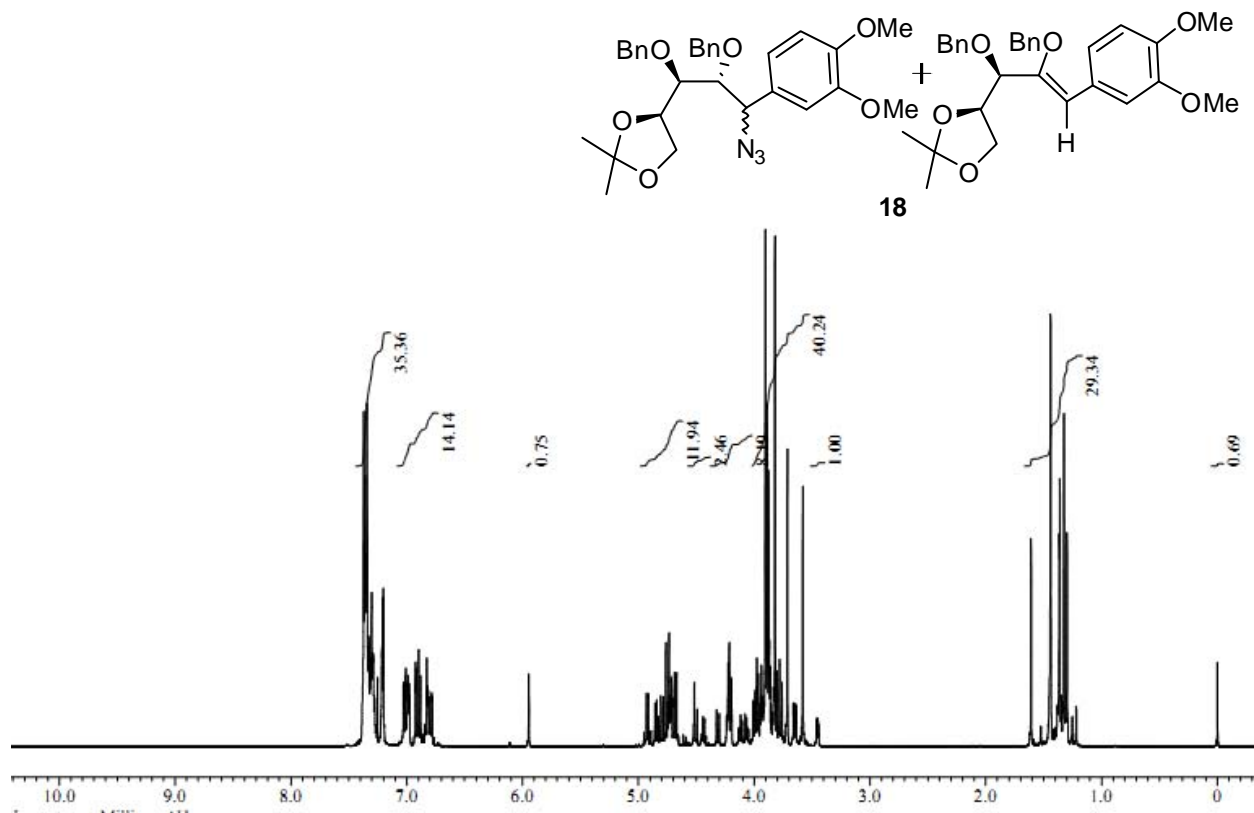

**Figure 8.1:**  $^1\text{H}$  NMR (500 MHz,  $\text{CDCl}_3$ ) Spectrum of Compound 18

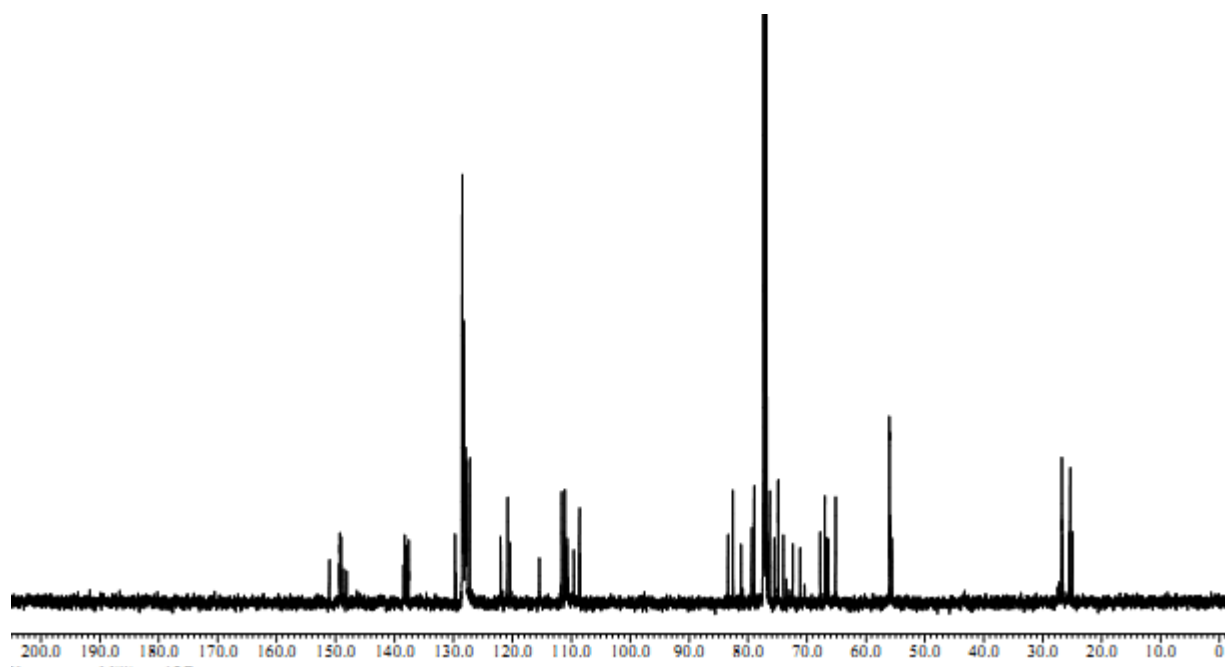

**Figure 8.2:**  $^{13}\text{C}$  NMR (125 MHz,  $\text{CDCl}_3$ ) Spectrum of Compound 18

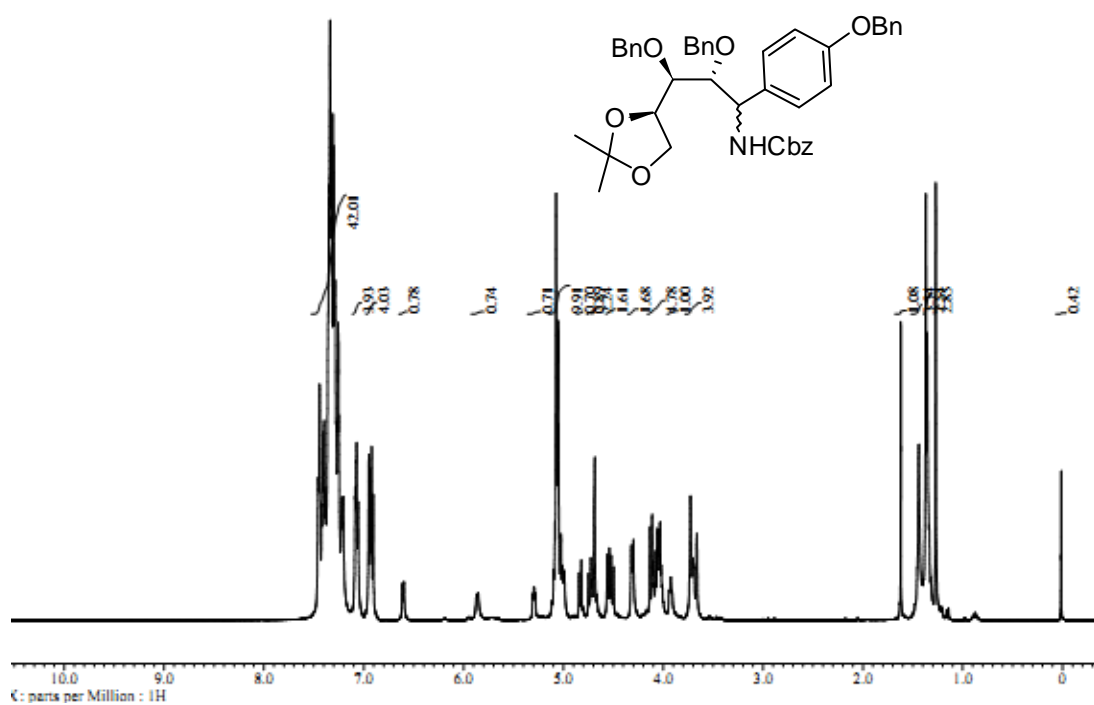

**Figure 9.1:**  $^1\text{H}$  NMR (500 MHz,  $\text{CDCl}_3$ ) Spectrum of Compound 9

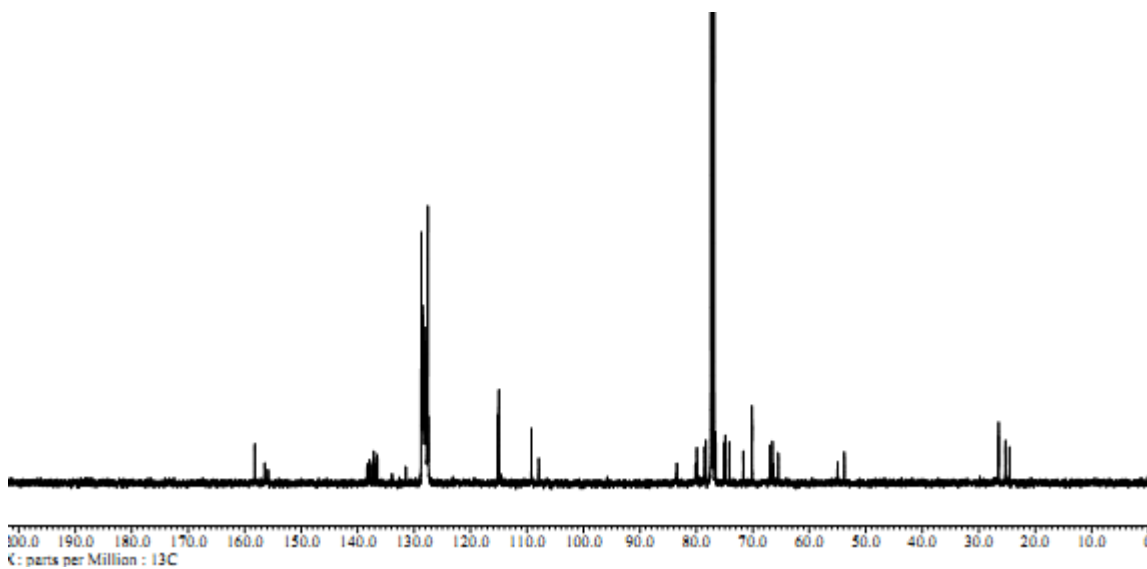

**Figure 9.2:**  $^{13}\text{C}$  NMR (125 MHz,  $\text{CDCl}_3$ ) Spectrum of Compound 9

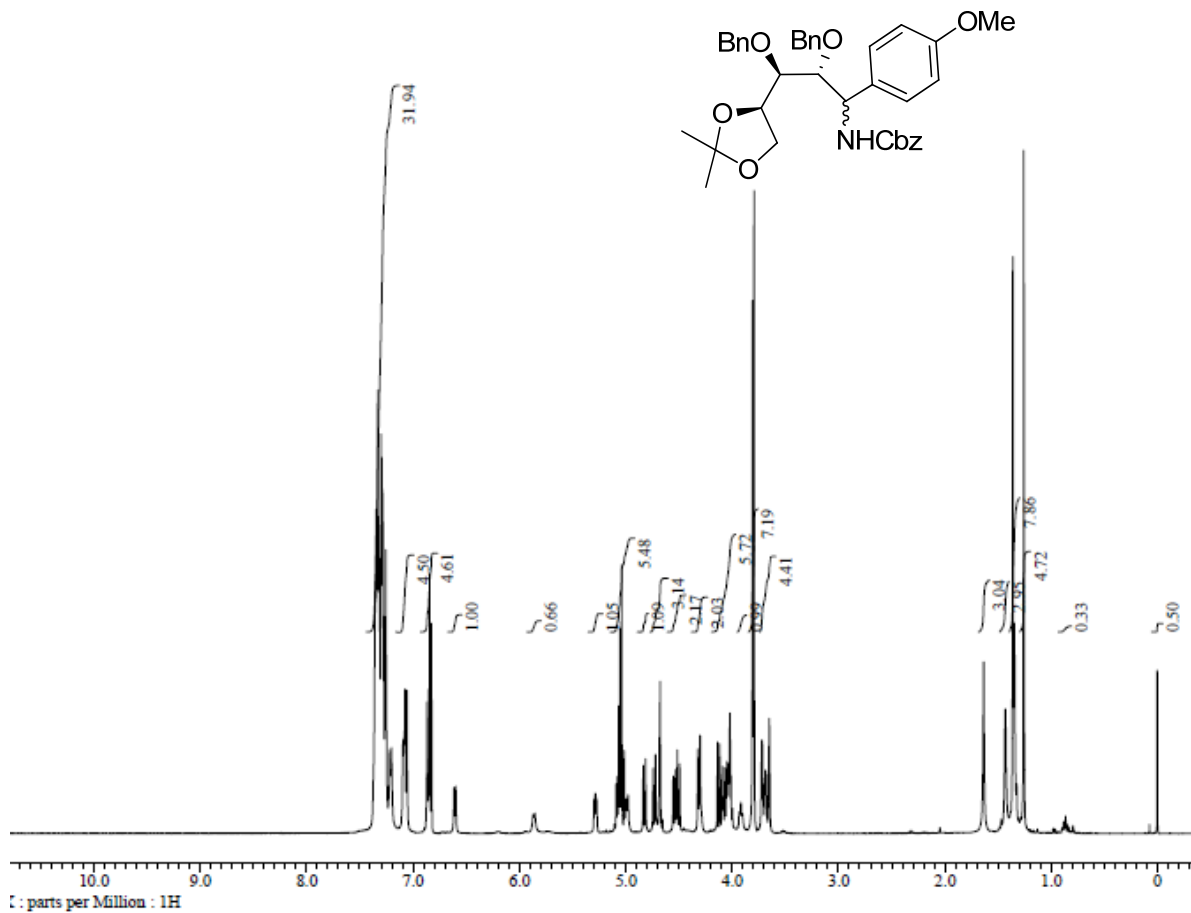

**Figure 10.1:**  $^1\text{H}$  NMR (500 MHz,  $\text{CDCl}_3$ ) Spectrum of Compound 19

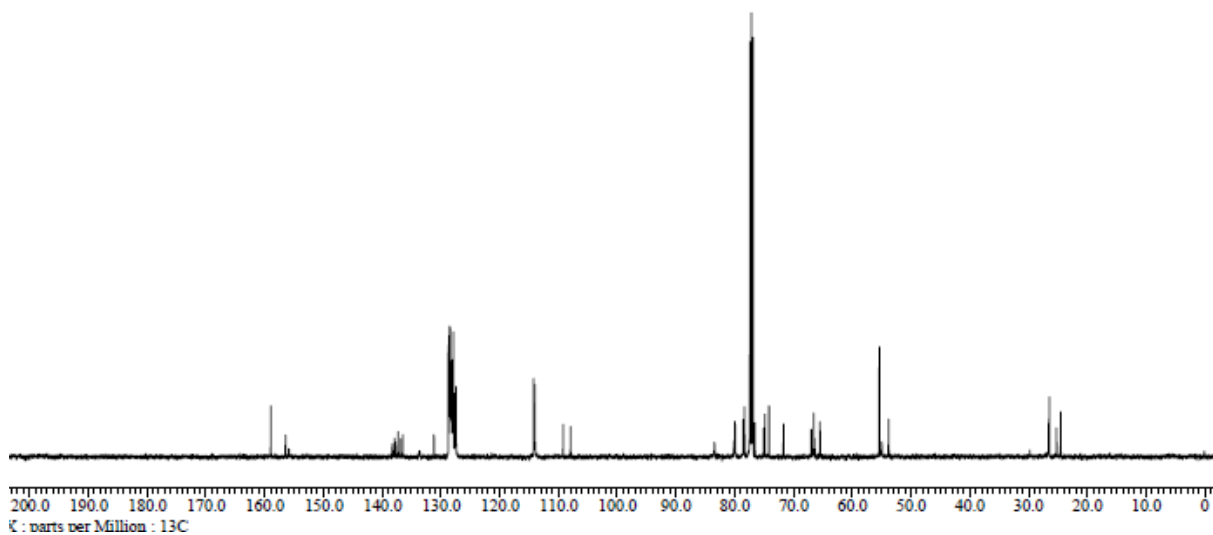

**Figure 10.2:**  $^{13}\text{C}$  NMR (125 MHz,  $\text{CDCl}_3$ ) Spectrum of Compound 20



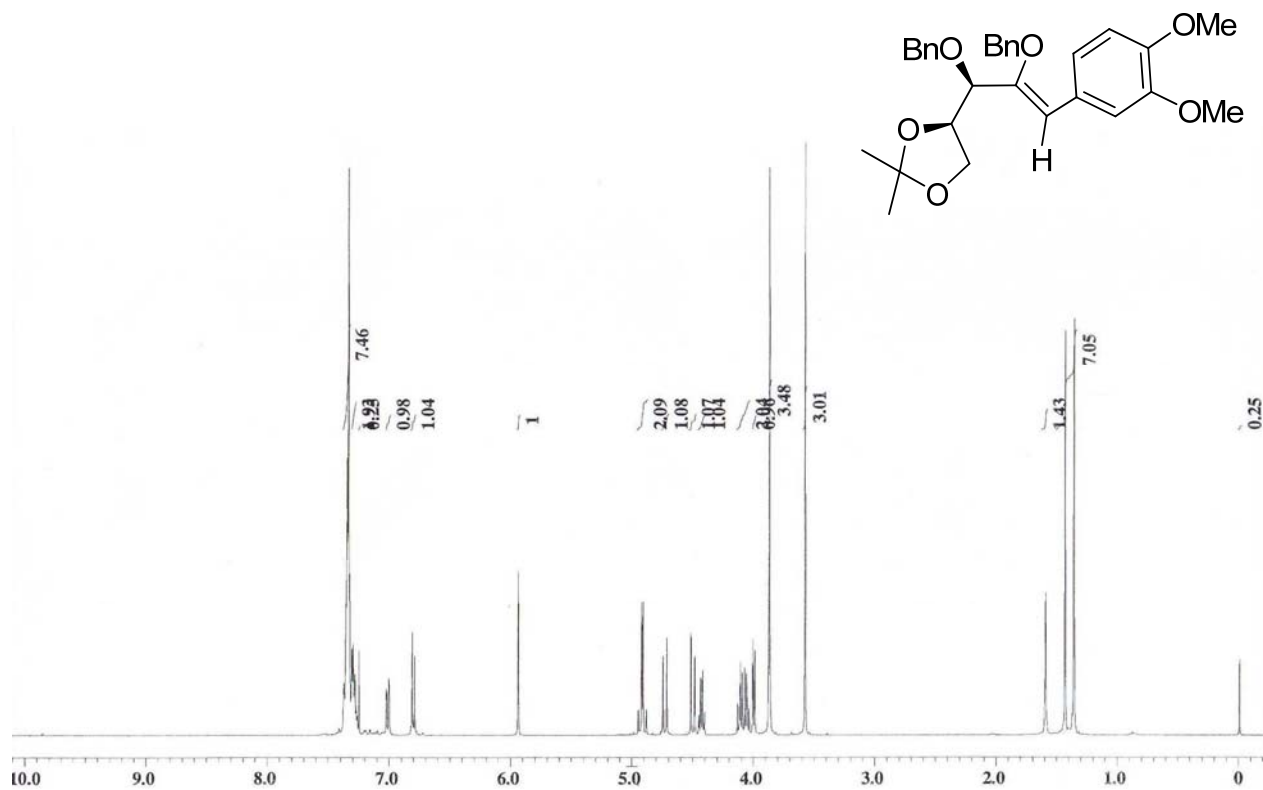

**Figure 12.1:** <sup>1</sup>H NMR (400 MHz, CDCl<sub>3</sub>) Spectrum of Compound 20b

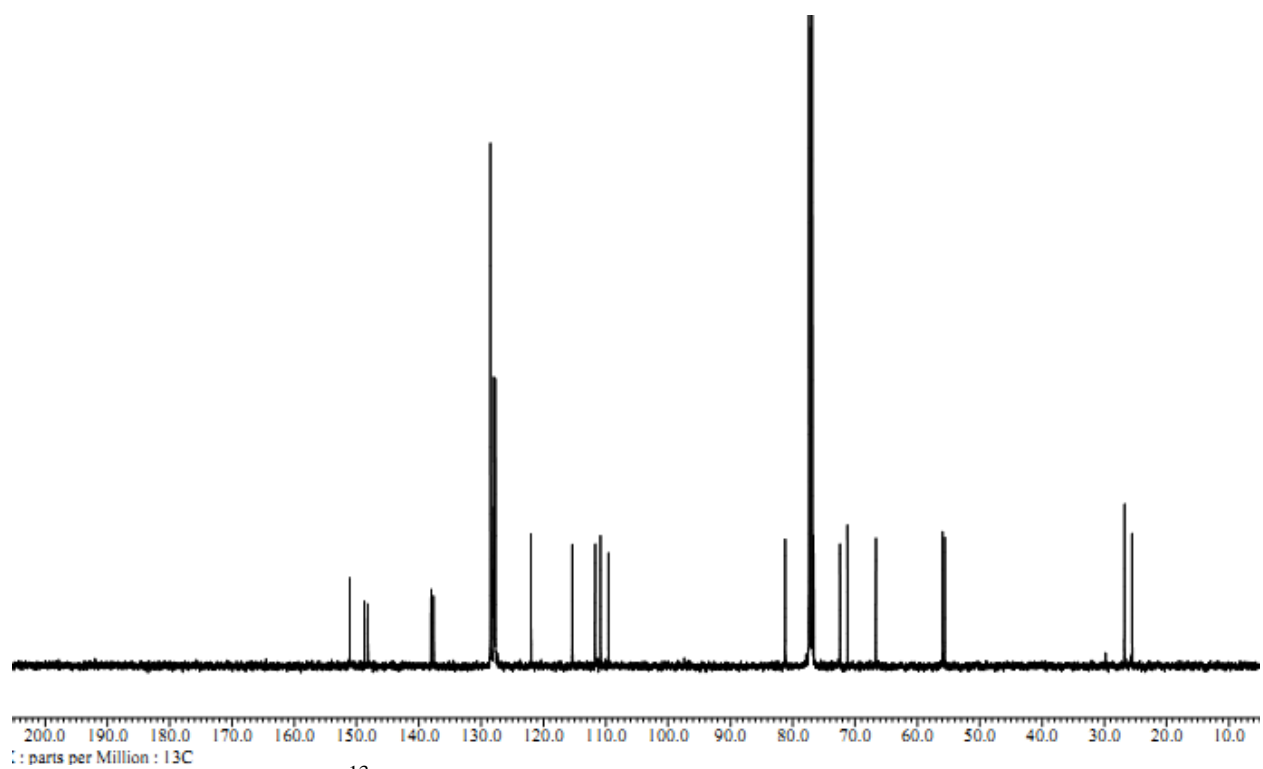

**Figure 12.2:** <sup>13</sup>C NMR (125 MHz, CDCl<sub>3</sub>) Spectrum of Compound 20b

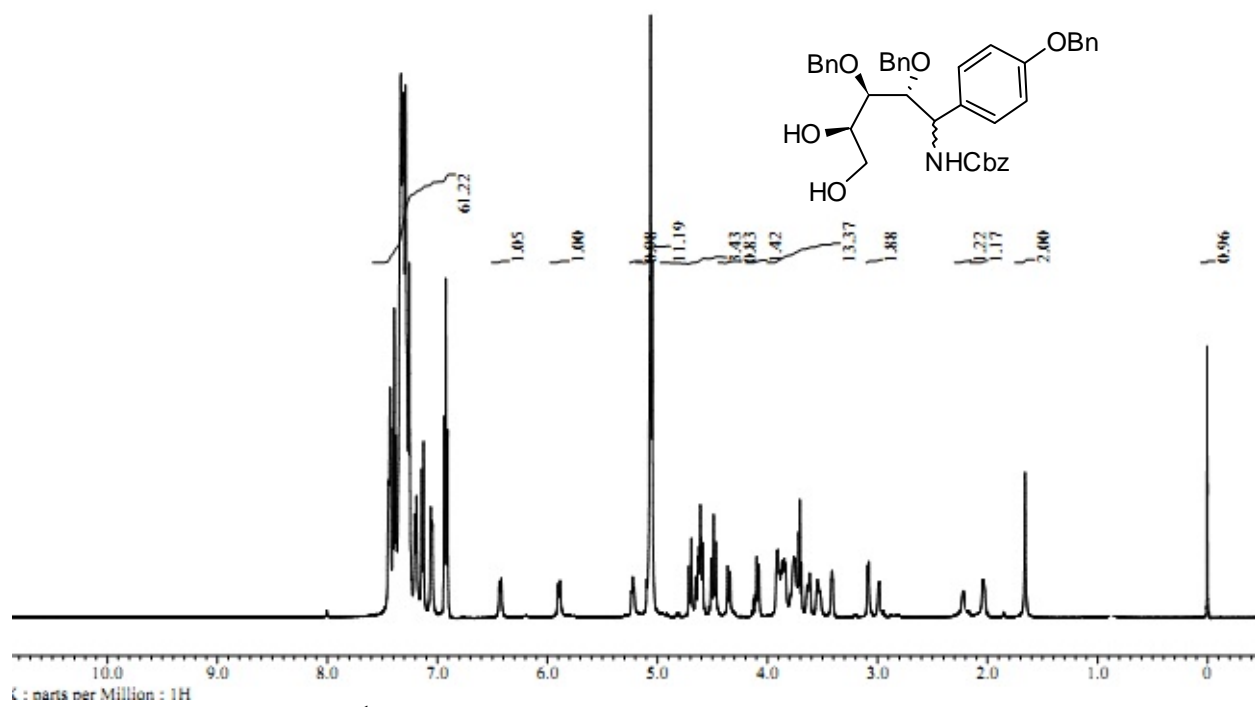

**Figure 13.1:**  $^1\text{H NMR}$  (500 MHz,  $\text{CDCl}_3$ ) Spectrum of Compound 10

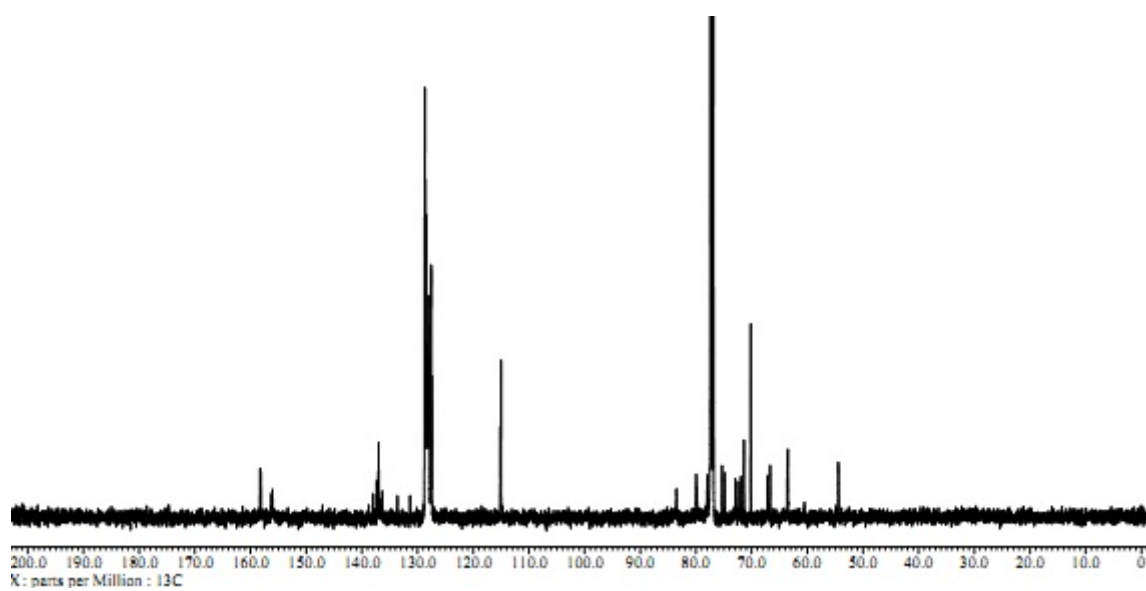

**Figure 13.2:**  $^{13}\text{C NMR}$  (125 MHz,  $\text{CDCl}_3$ ) Spectrum of Compound 10

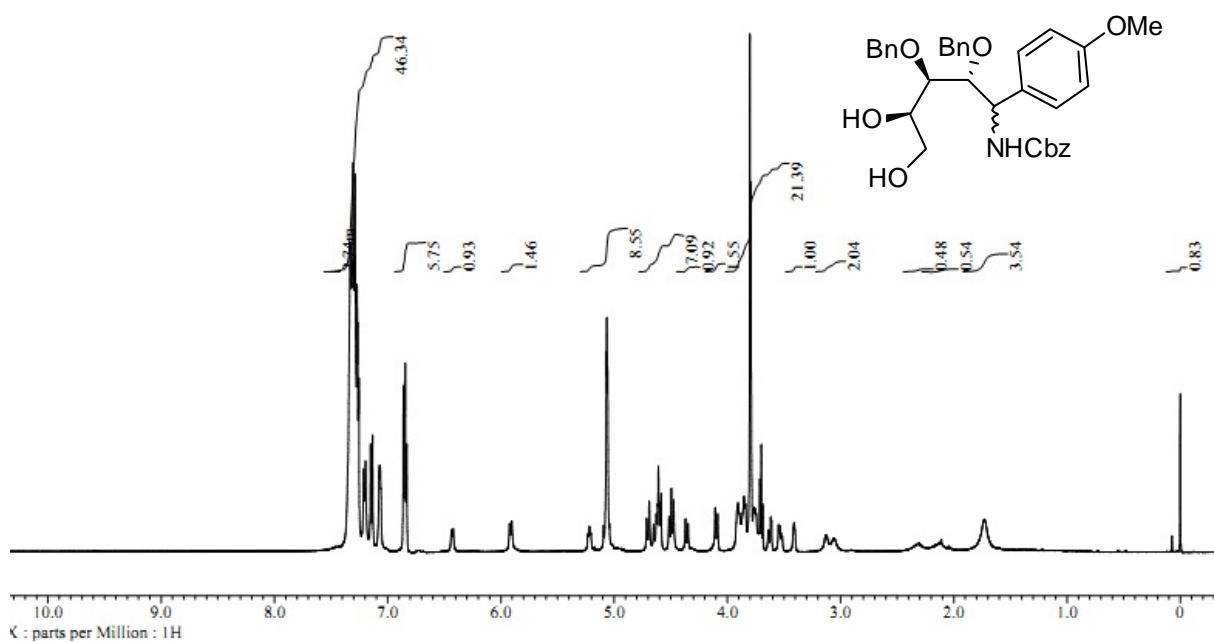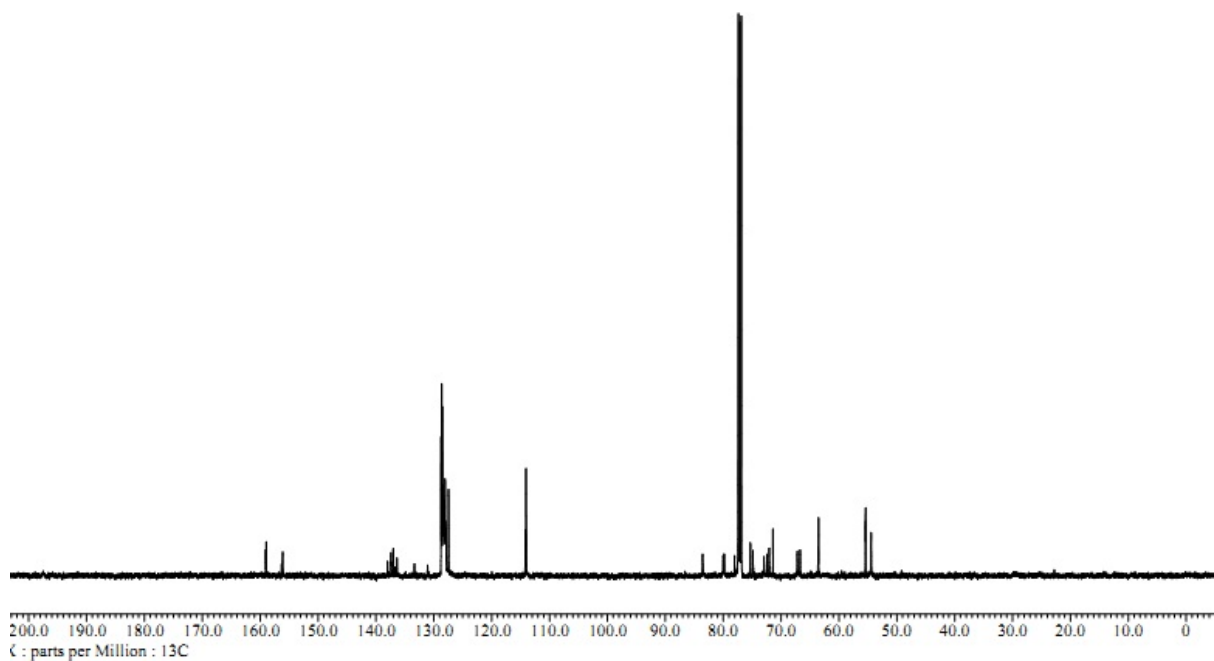



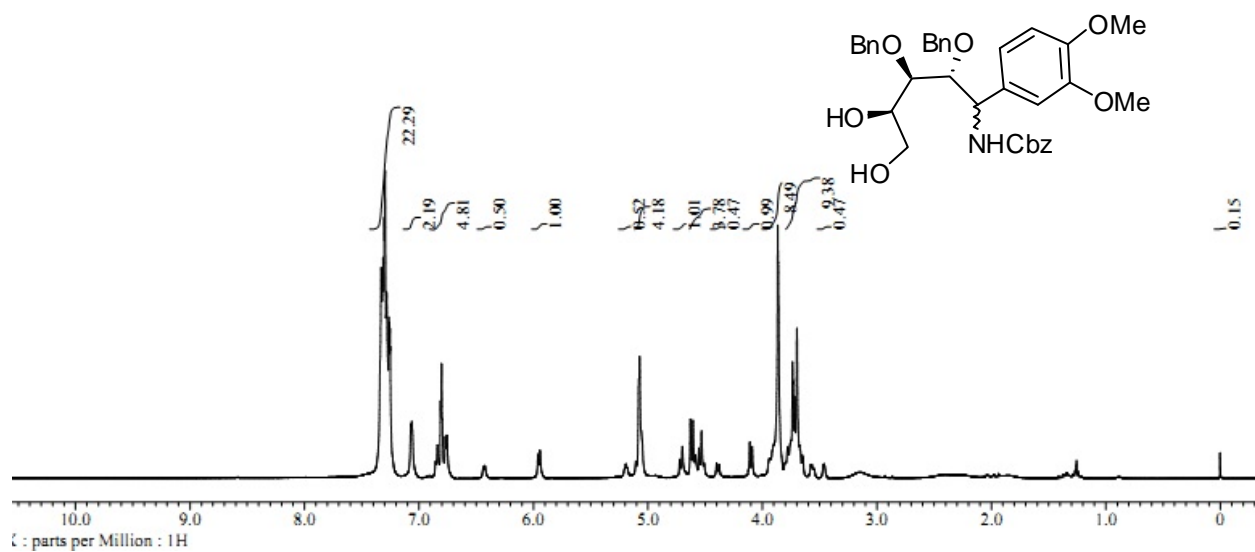

**Figure 15.1:**  $^1\text{H NMR}$  (500 MHz,  $\text{CDCl}_3$ ) Spectrum of Compound 22

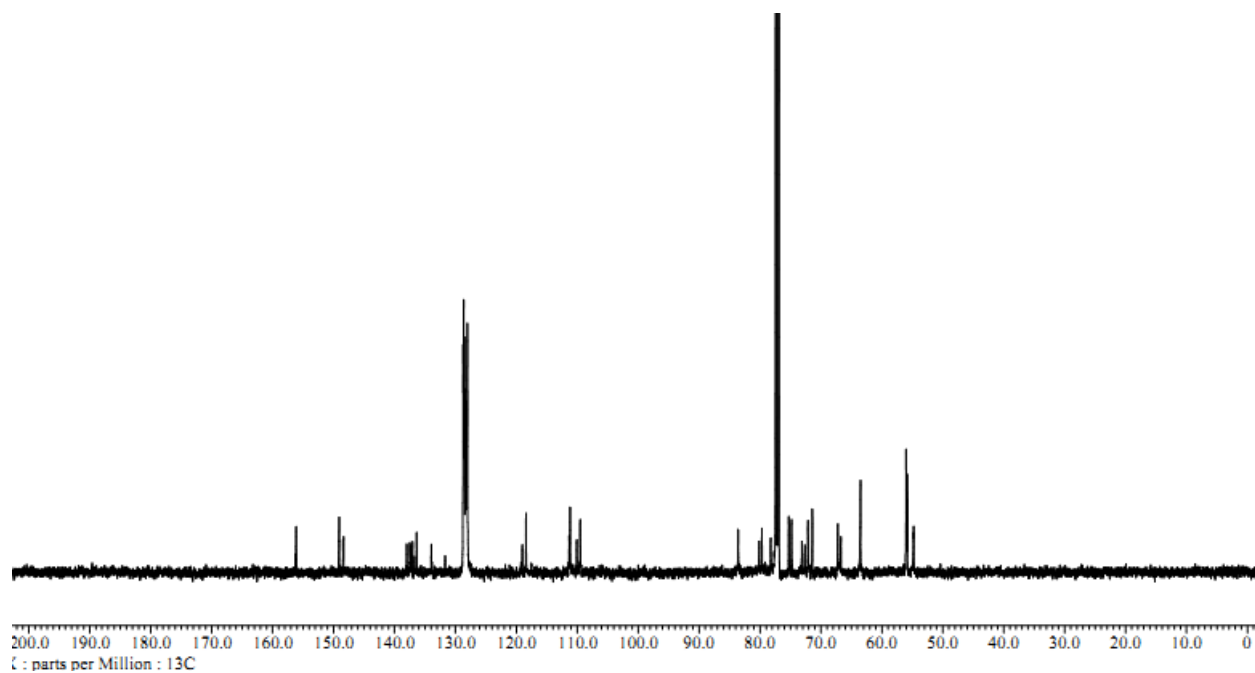

**Figure 15.2:**  $^{13}\text{C NMR}$  (125 MHz,  $\text{CDCl}_3$ ) Spectrum of Compound 22

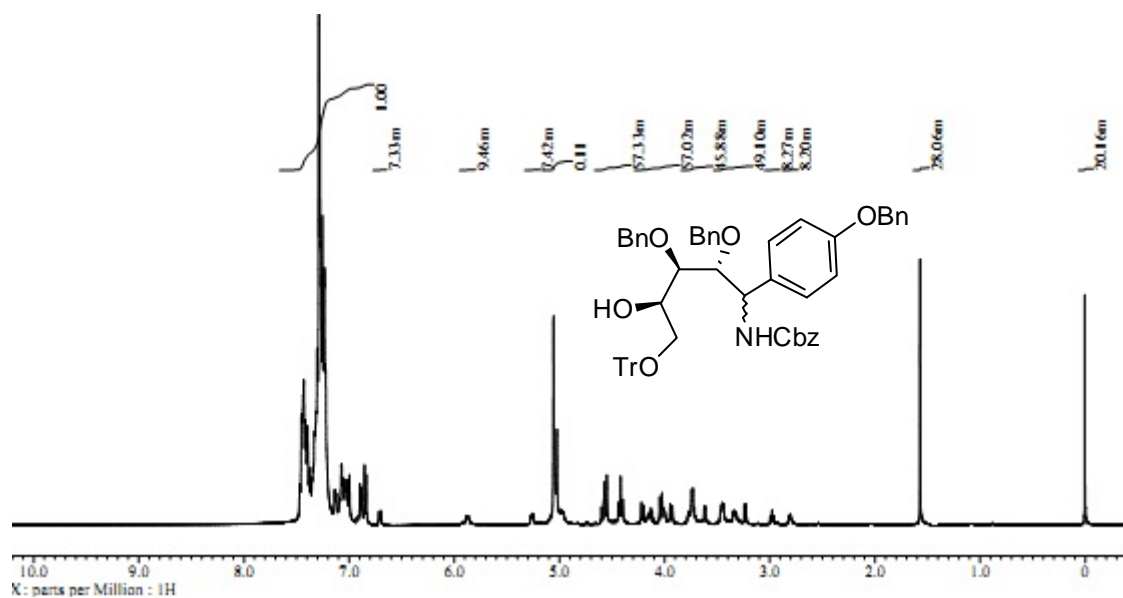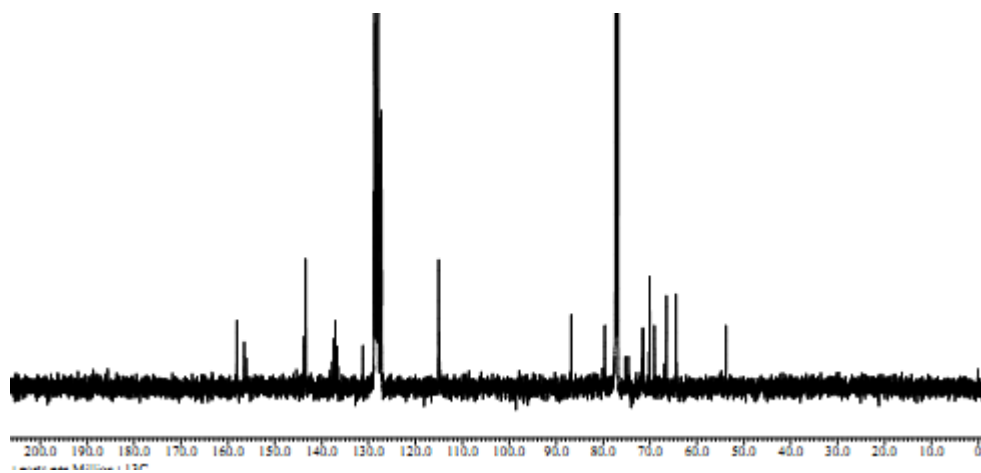

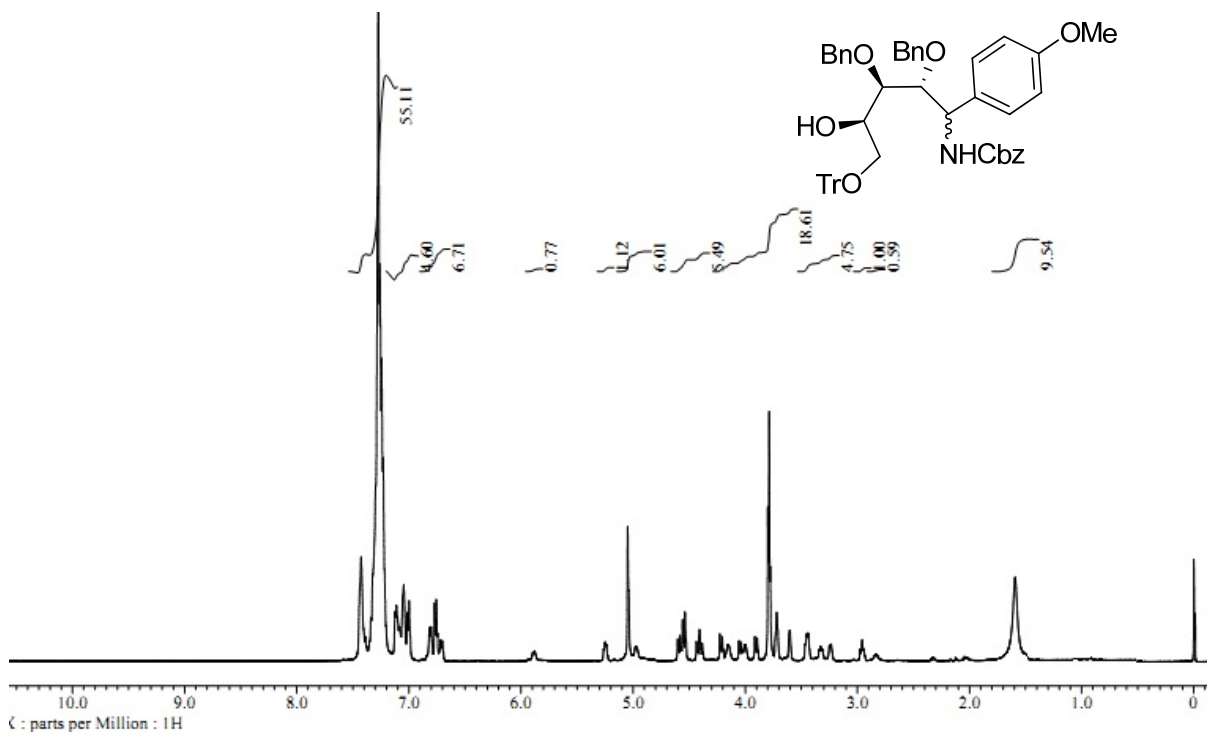

**Figure 17.1:** <sup>1</sup>H NMR (500 MHz, CDCl<sub>3</sub>) Spectrum of Compound **23**

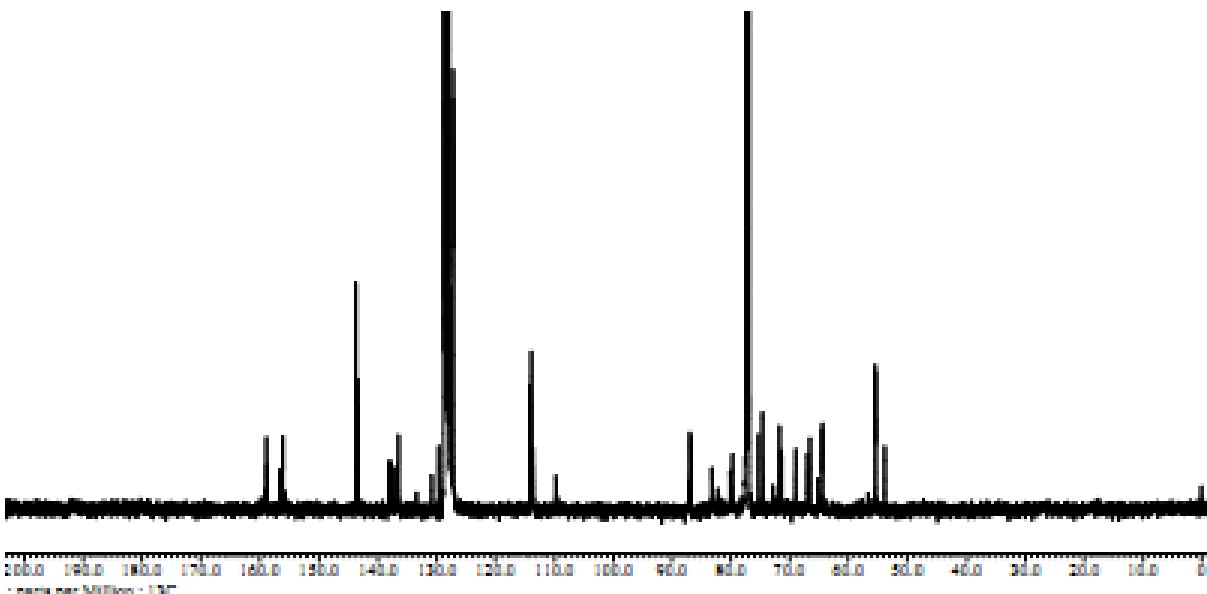

**Figure 17.2:** <sup>13</sup>C NMR (125 MHz, CDCl<sub>3</sub>) Spectrum of Compound **23**

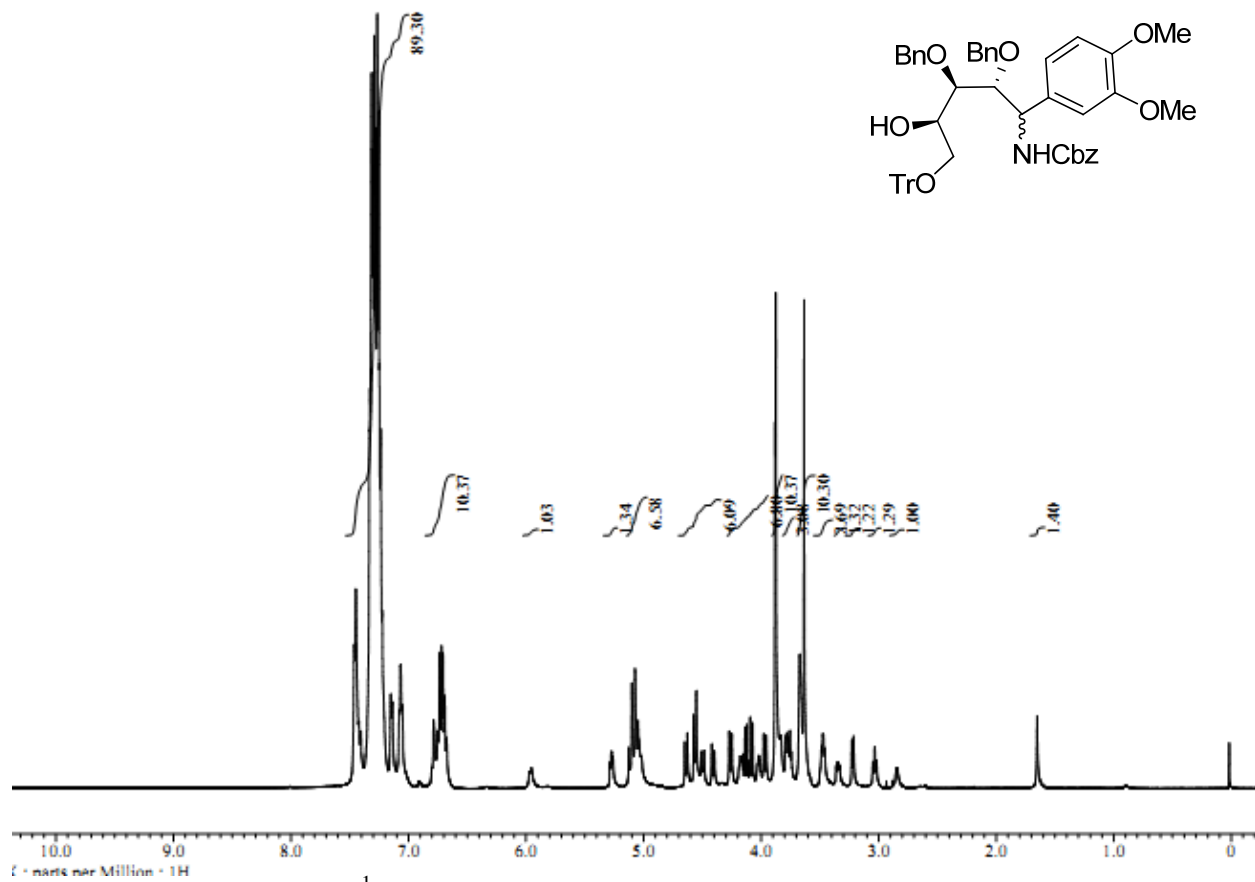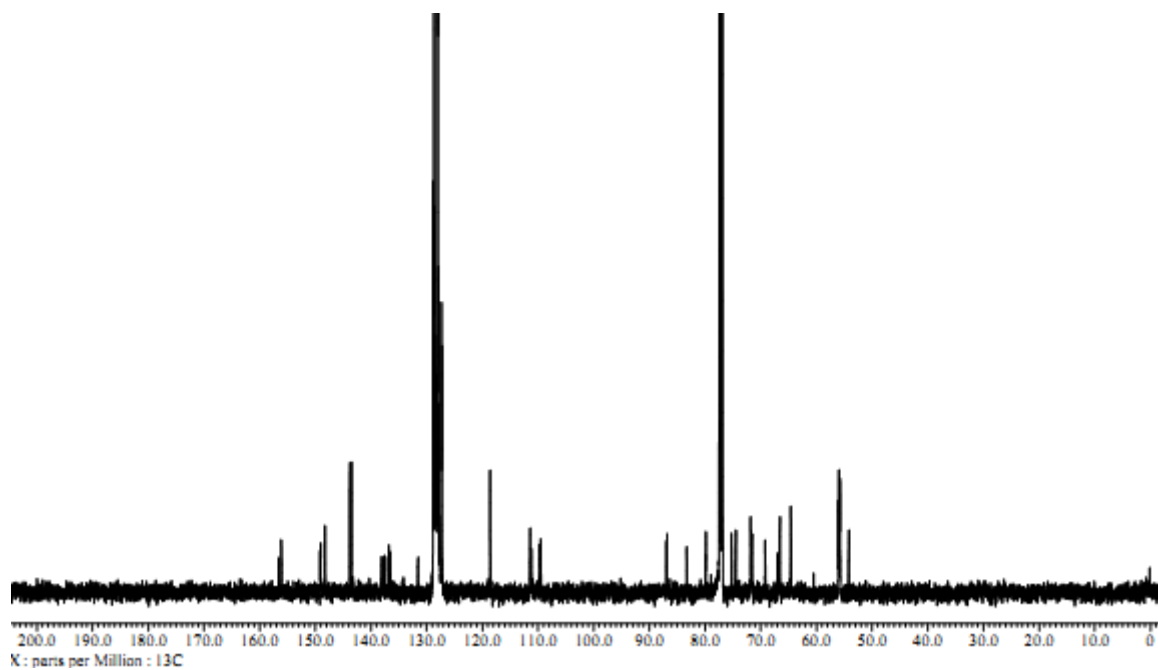

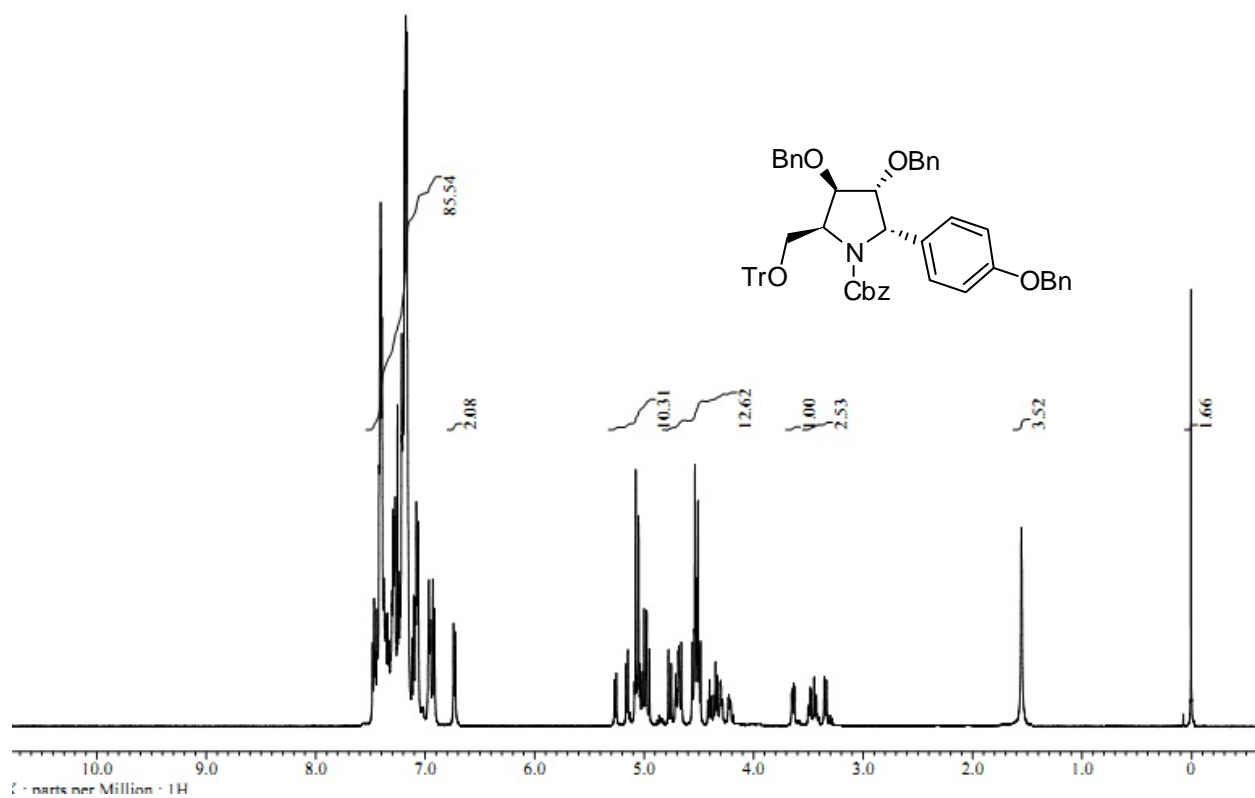

**Figure 19.1:**  $^1\text{H}$  NMR (500 MHz,  $\text{CDCl}_3$ ) Spectrum of Compound **12a**

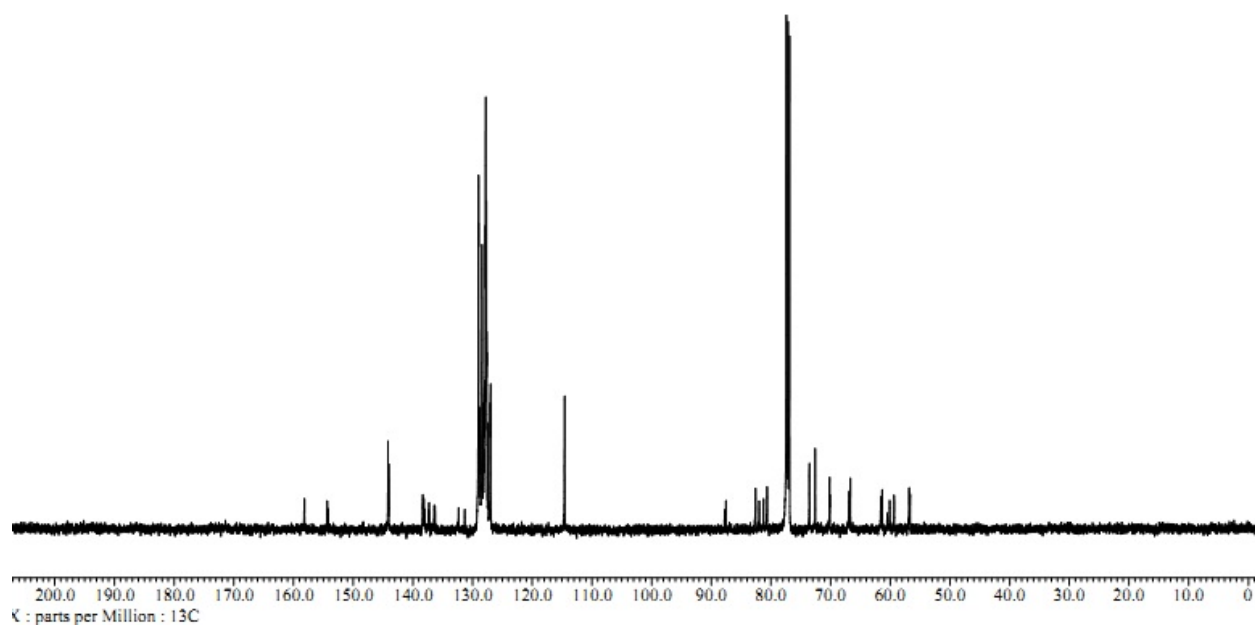

**Figure 19.2:**  $^{13}\text{C}$  NMR (125 MHz,  $\text{CDCl}_3$ ) Spectrum of Compound **12a**

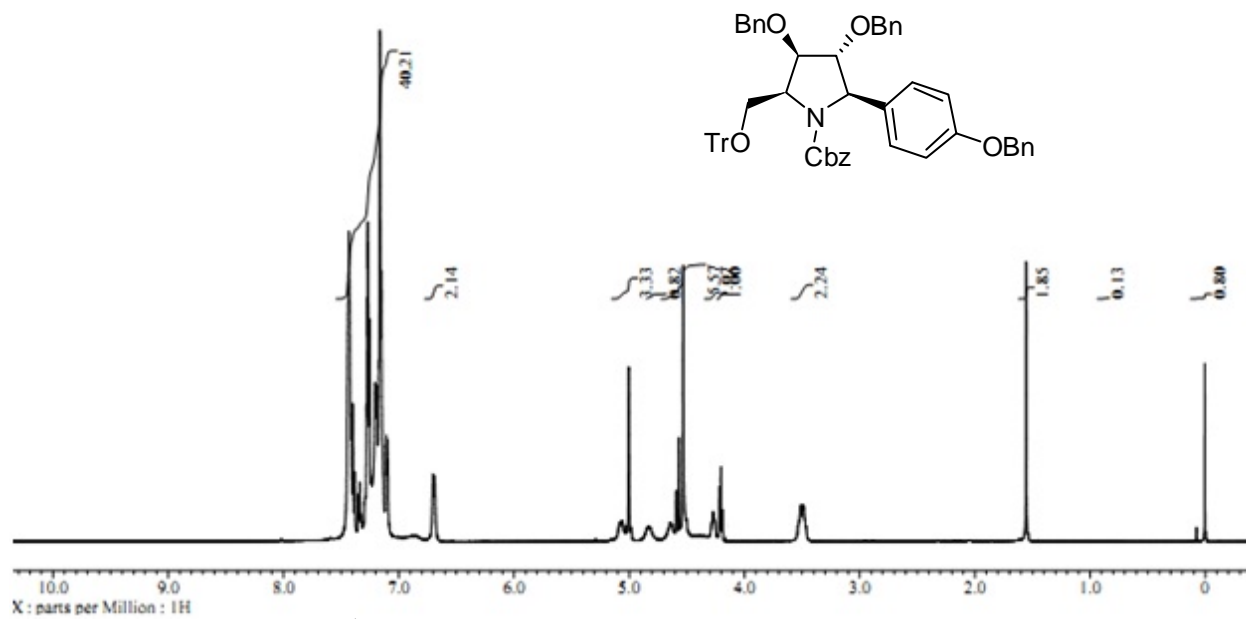

**Figure 20.1:**  $^1\text{H}$  NMR (500 MHz,  $\text{CDCl}_3$ ) Spectrum of Compound **12b**

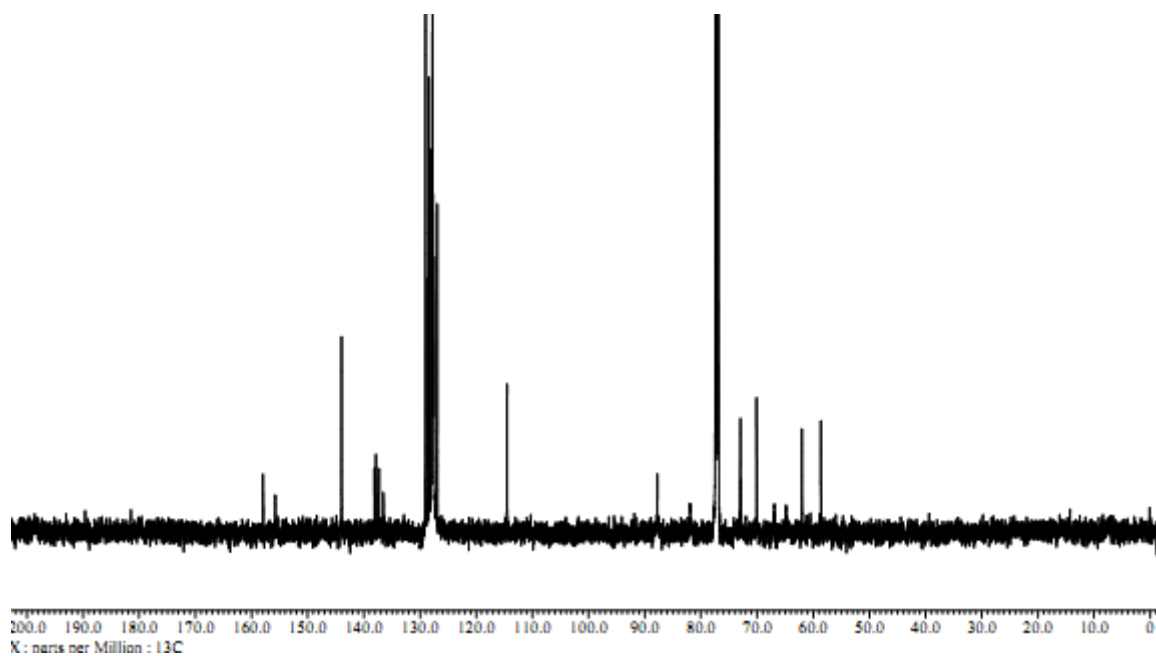

**Figure 20.2:**  $^{13}\text{C}$  NMR (125 MHz,  $\text{CDCl}_3$ ) Spectrum of Compound **12b**

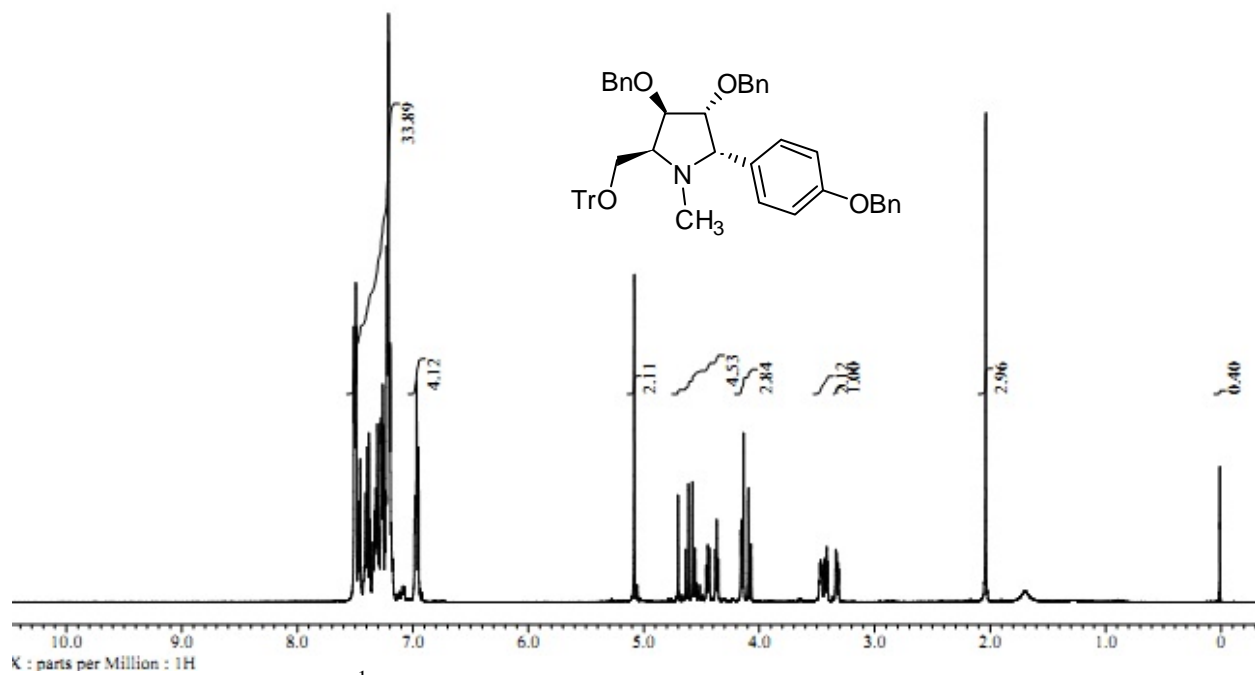

**Figure 21.1:**  $^1\text{H}$  NMR (500 MHz,  $\text{CDCl}_3$ ) Spectrum of Compound 13a

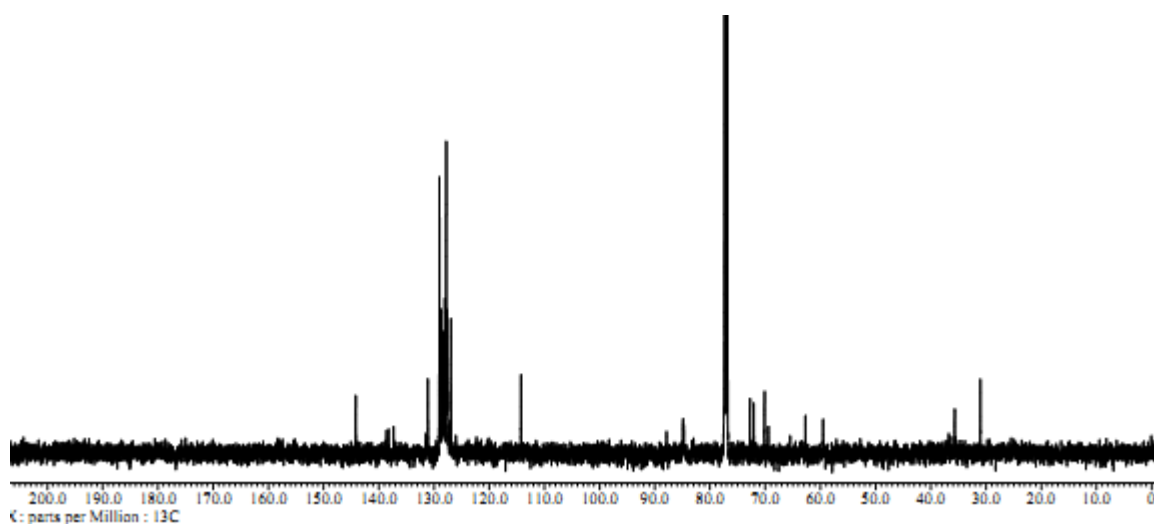

**Figure 21.2:**  $^{13}\text{C}$  NMR (125 MHz,  $\text{CDCl}_3$ ) Spectrum of Compound 13a

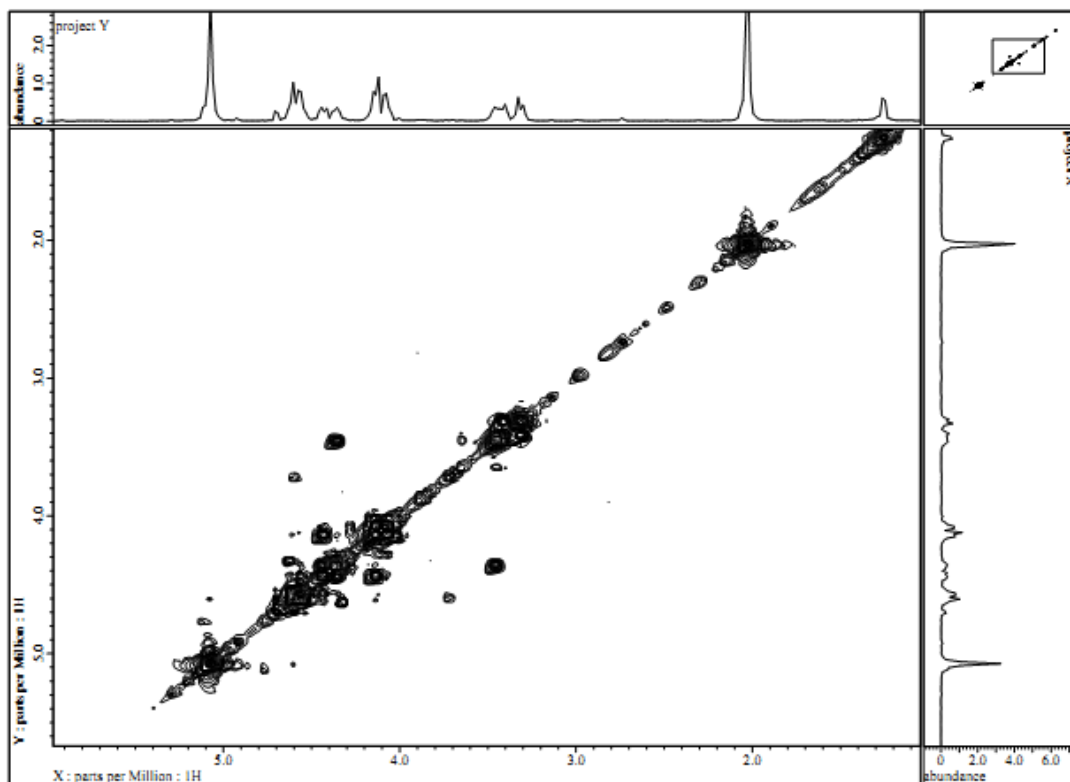

Figure 21.3:  $^1\text{H}-^1\text{H}$  COSY Spectrum of Compound 13a

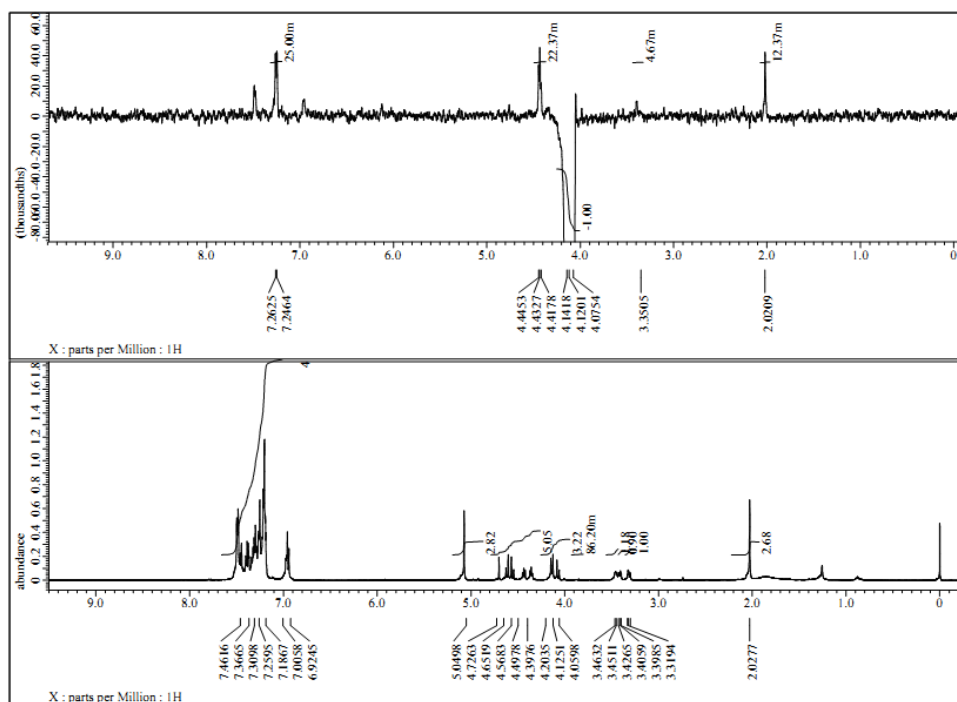

Figure 21.4: NOE irradiation of H-2 proton Spectrum of Compound 13a



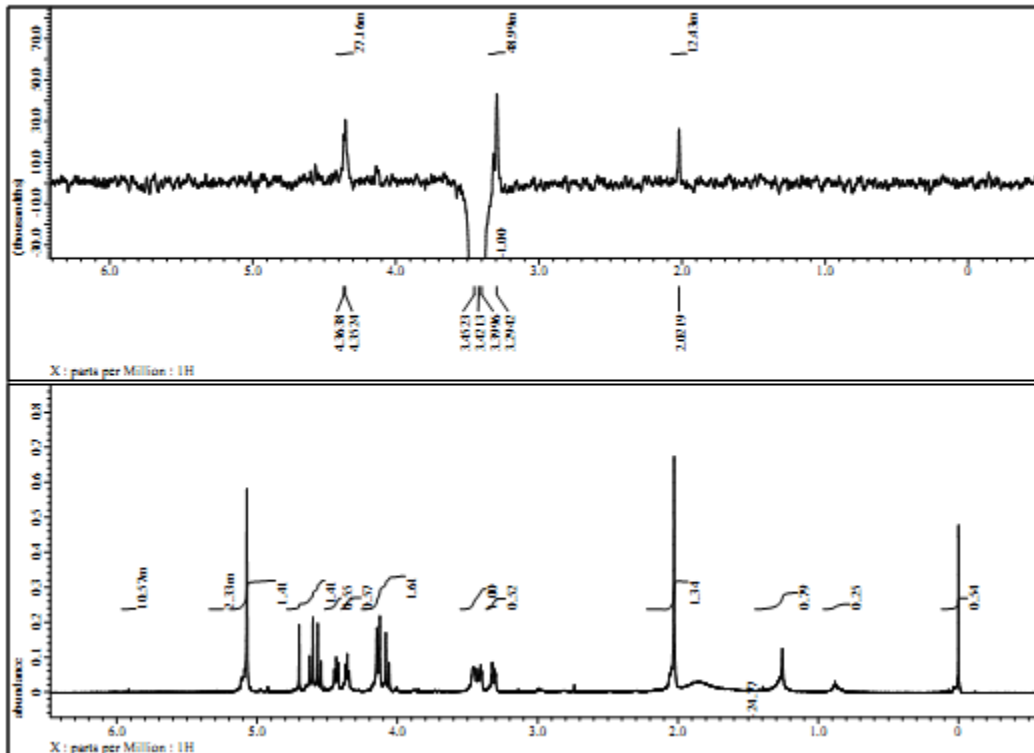

**Figure 21.5:** NOE irradiation of H-5 proton Spectrum of Compound 13a

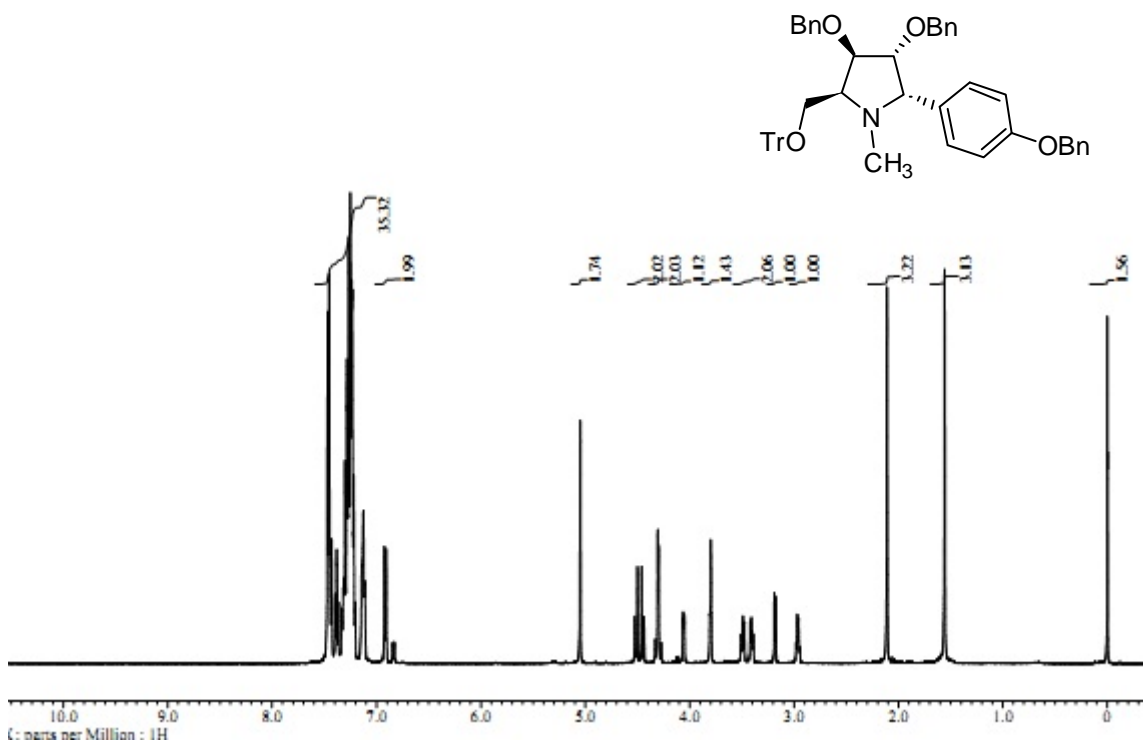

**Figure 22.1:** <sup>1</sup>H NMR (500 MHz, CDCl<sub>3</sub>) Spectrum of Compound 13b

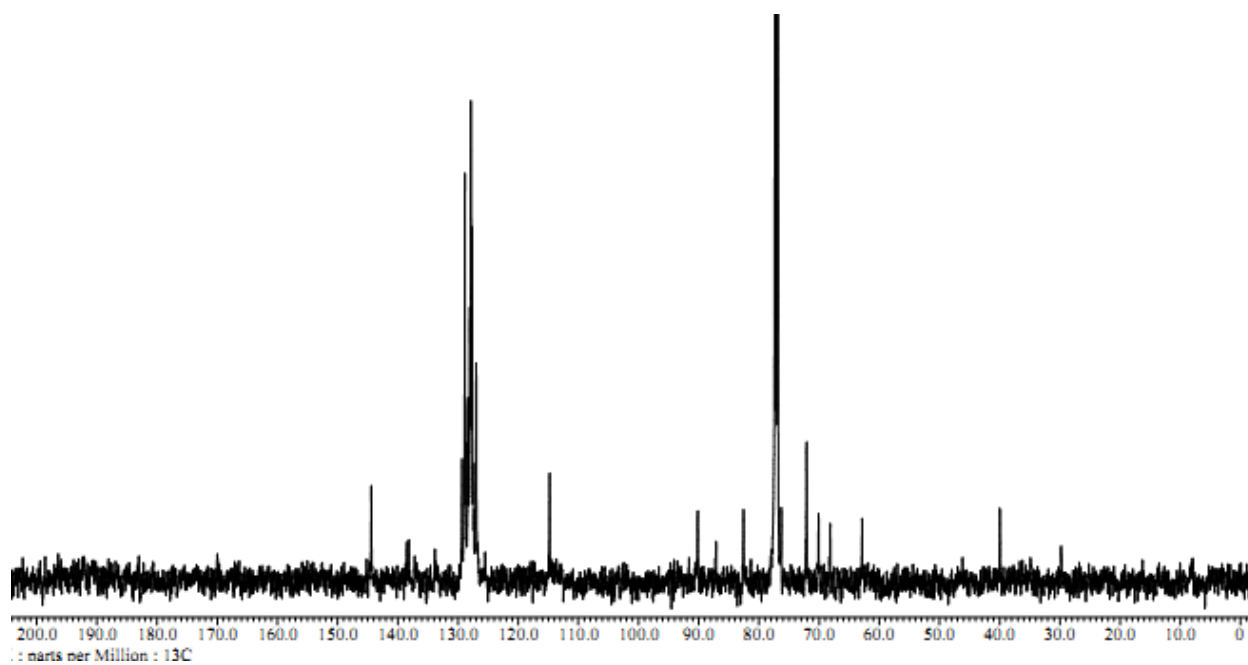

**Figure 22.2:** <sup>13</sup>C NMR (125 MHz, CDCl<sub>3</sub>) Spectrum of Compound 13b

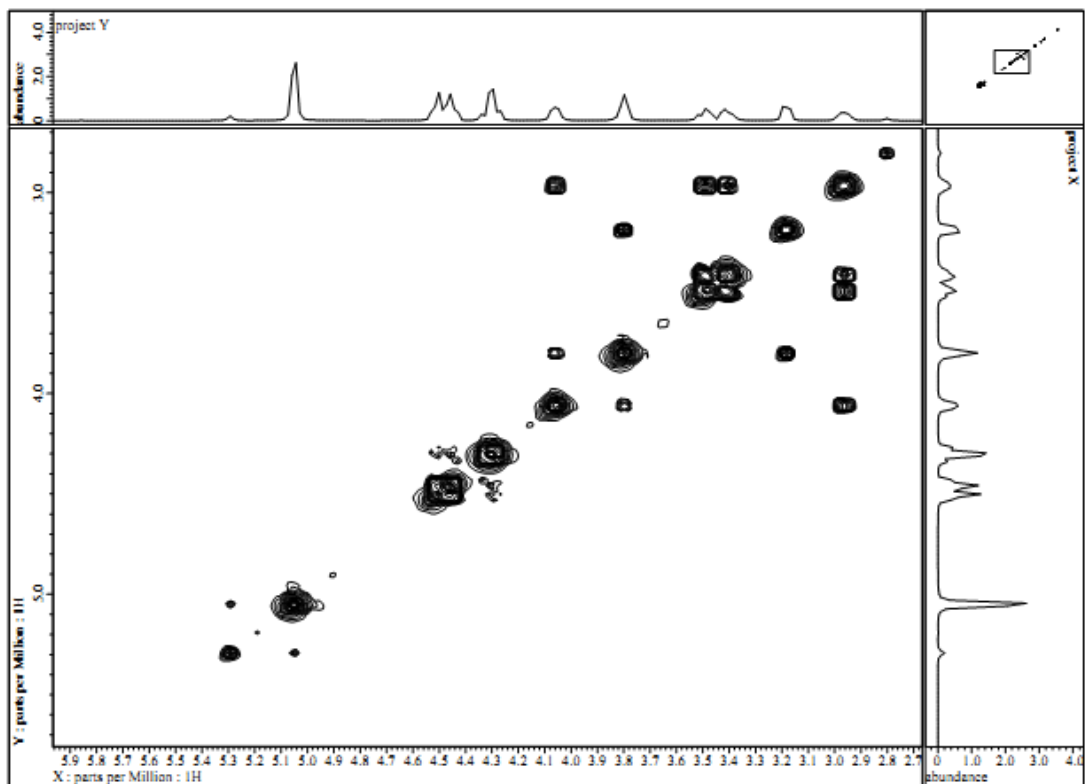

Figure 22.3:  $^1\text{H}$ - $^1\text{H}$  COSY Spectrum of Compound **13b**

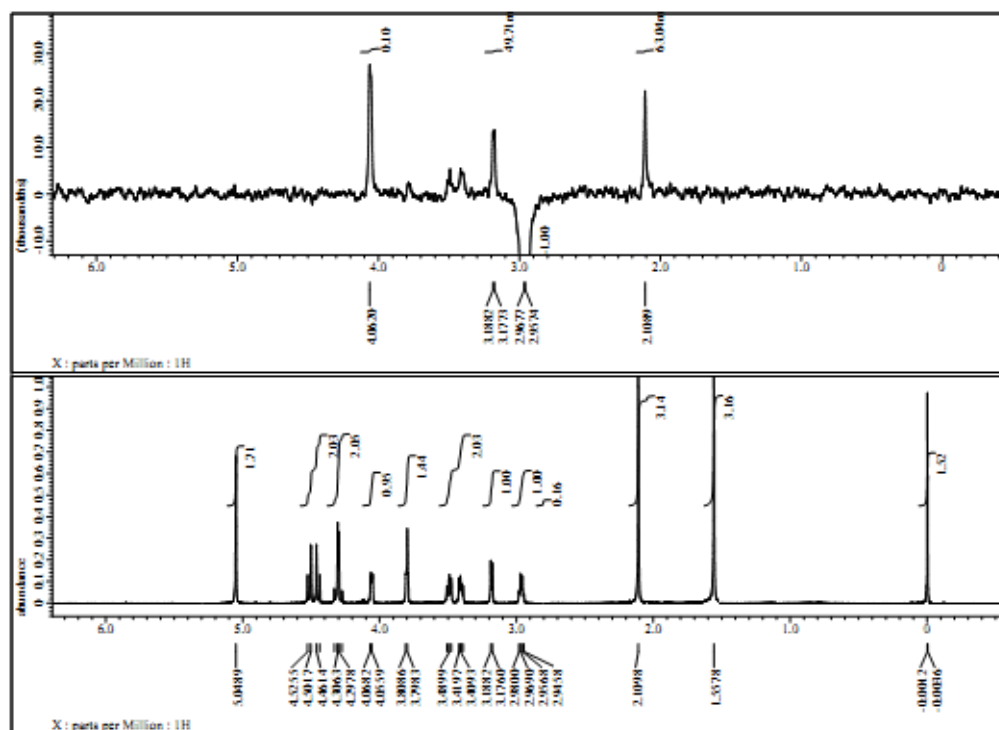

Figure 22.4: NOE irradiation of H-5 proton Spectrum of Compound **13b**

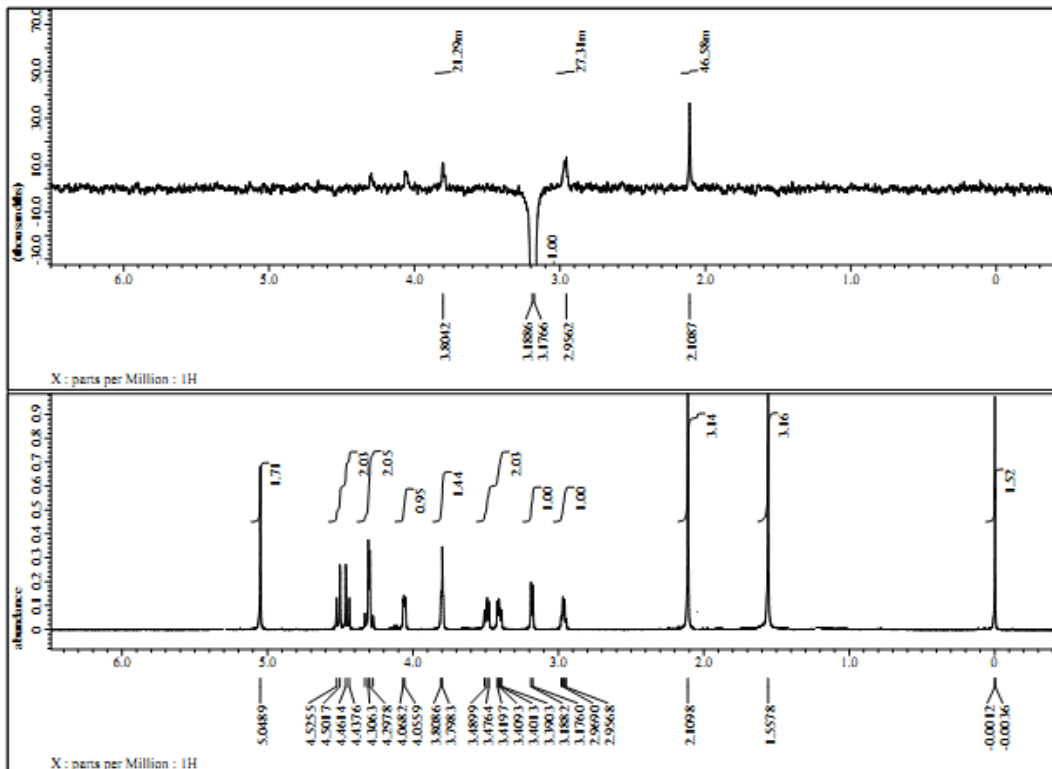

**Figure 22.5:** NOE irradiation of H-2 proton Spectrum of Compound 13b

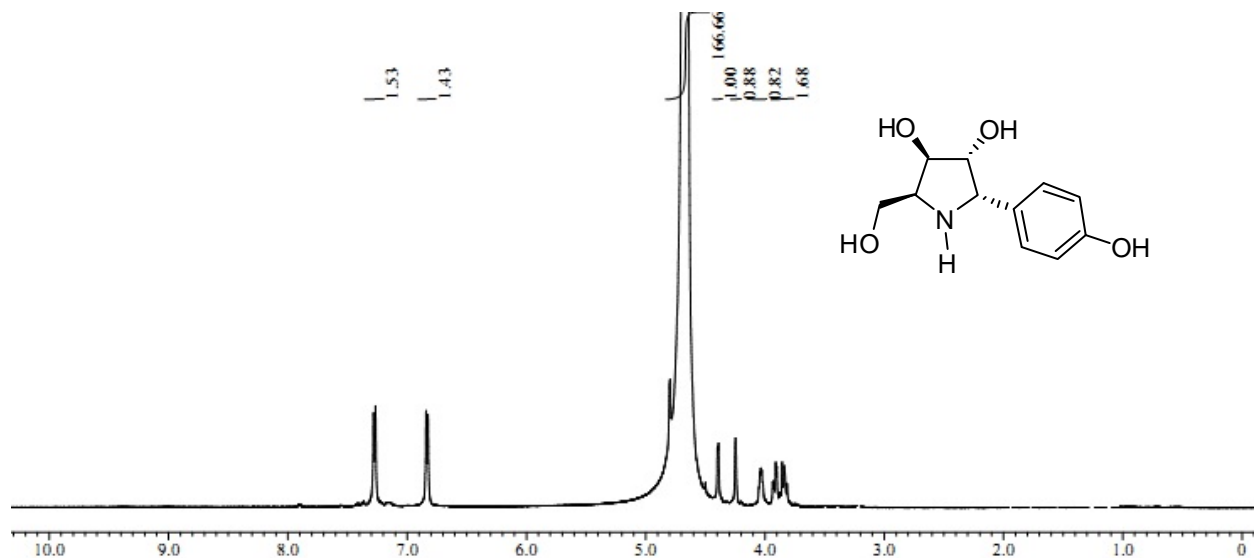

**Figure 23.1:**  $^1\text{H}$  NMR (500 MHz,  $\text{D}_2\text{O}$ ) Spectrum of Compound 14a

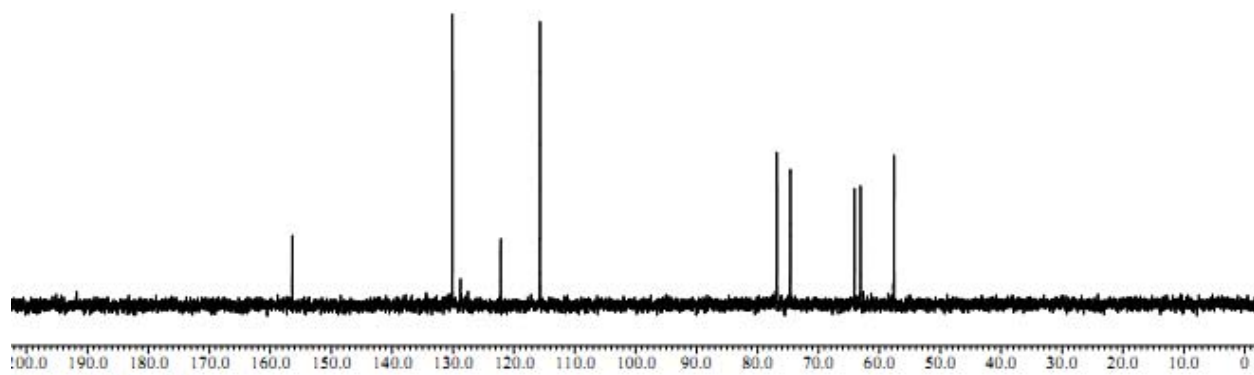

**Figure 23.2:**  $^{13}\text{C}$  NMR (125 MHz,  $\text{D}_2\text{O}$ ) Spectrum of Compound 14a

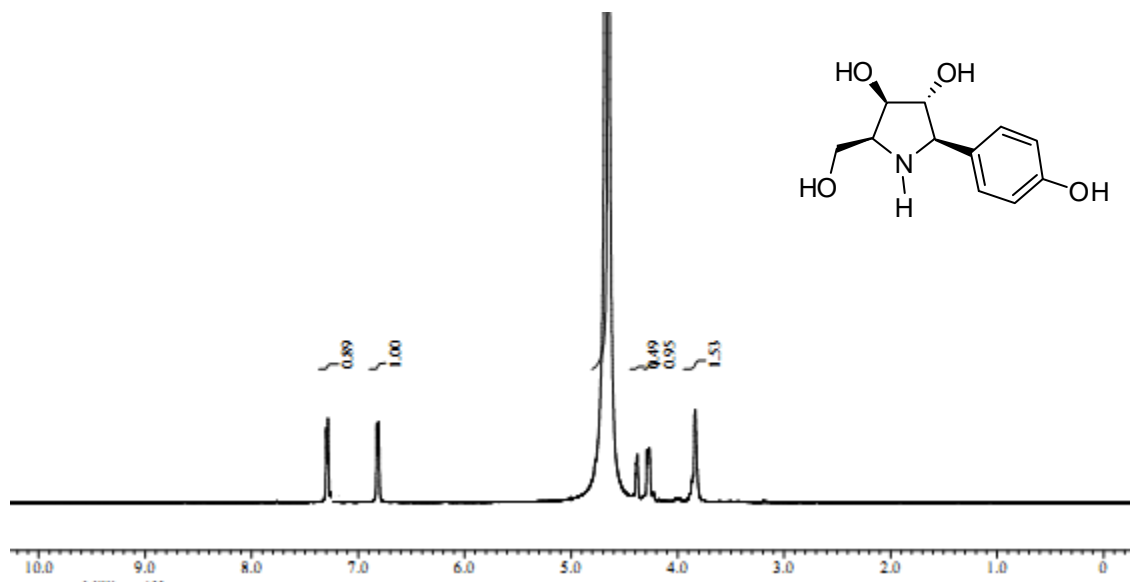

Figure 24.1:  $^1\text{H}$  NMR (500 MHz,  $\text{D}_2\text{O}$ ) Spectrum of Compound **14b**

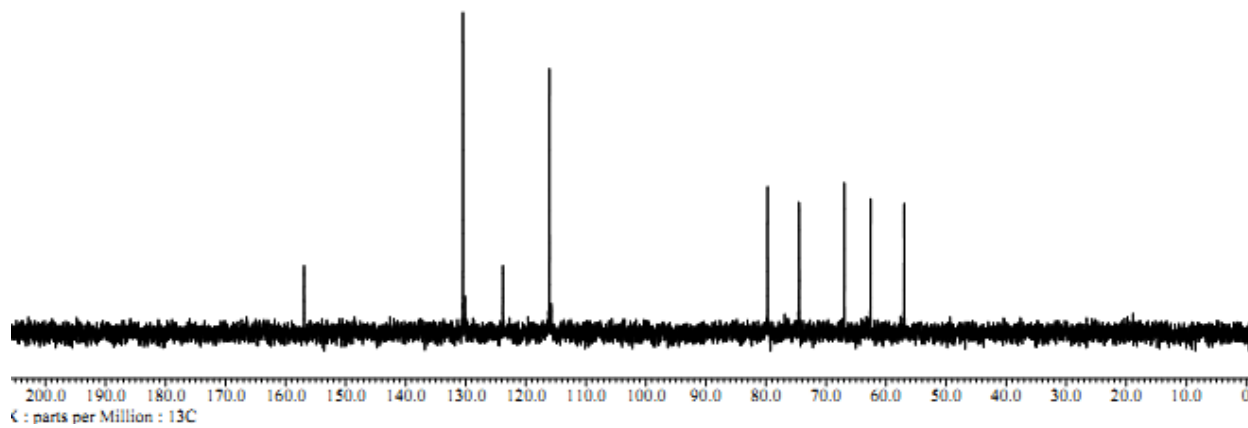

Figure 24.2:  $^{13}\text{C}$  NMR (125 MHz,  $\text{D}_2\text{O}$ ) Spectrum of Compound **14b**

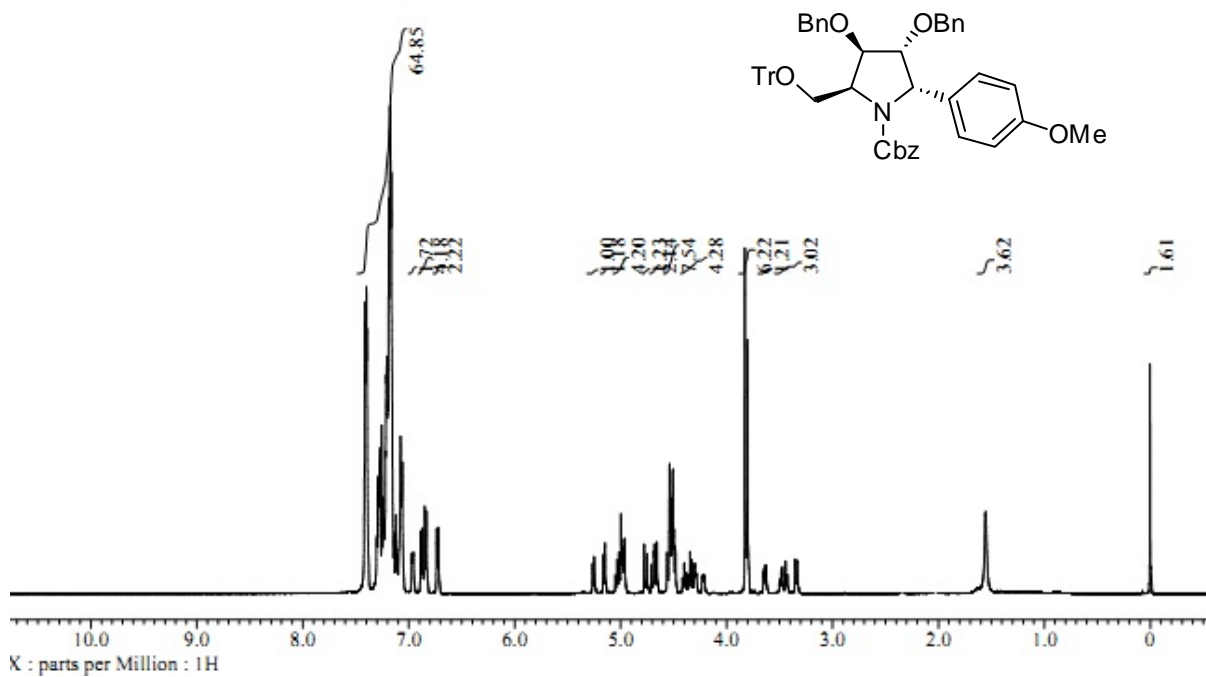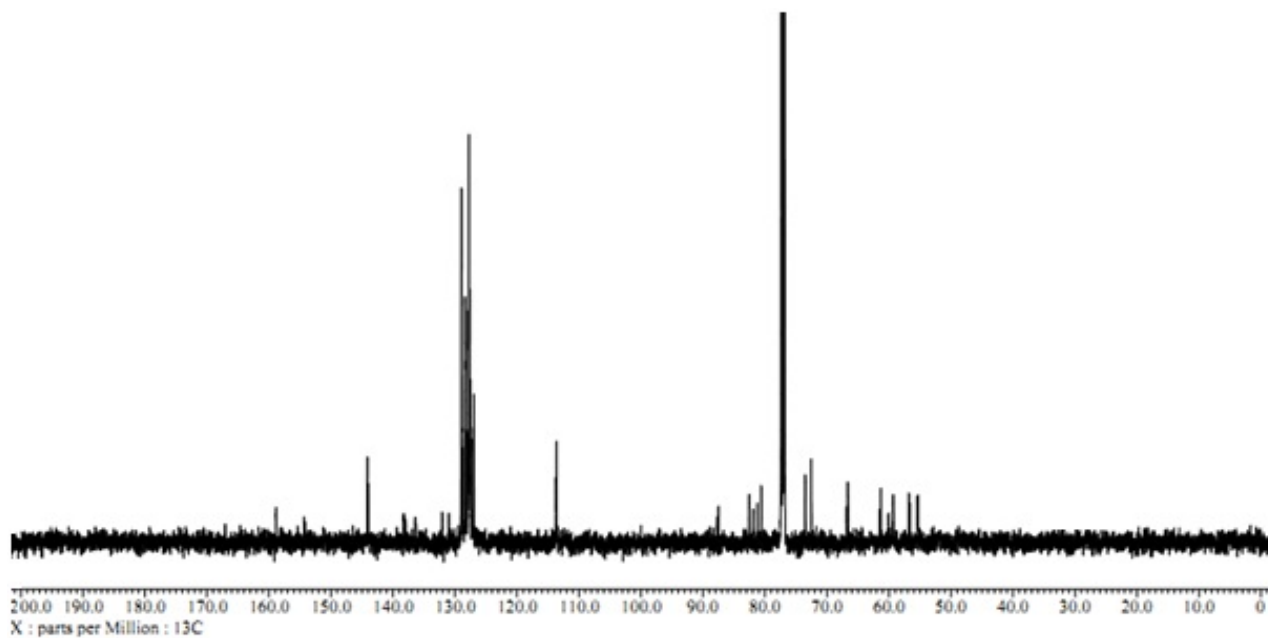

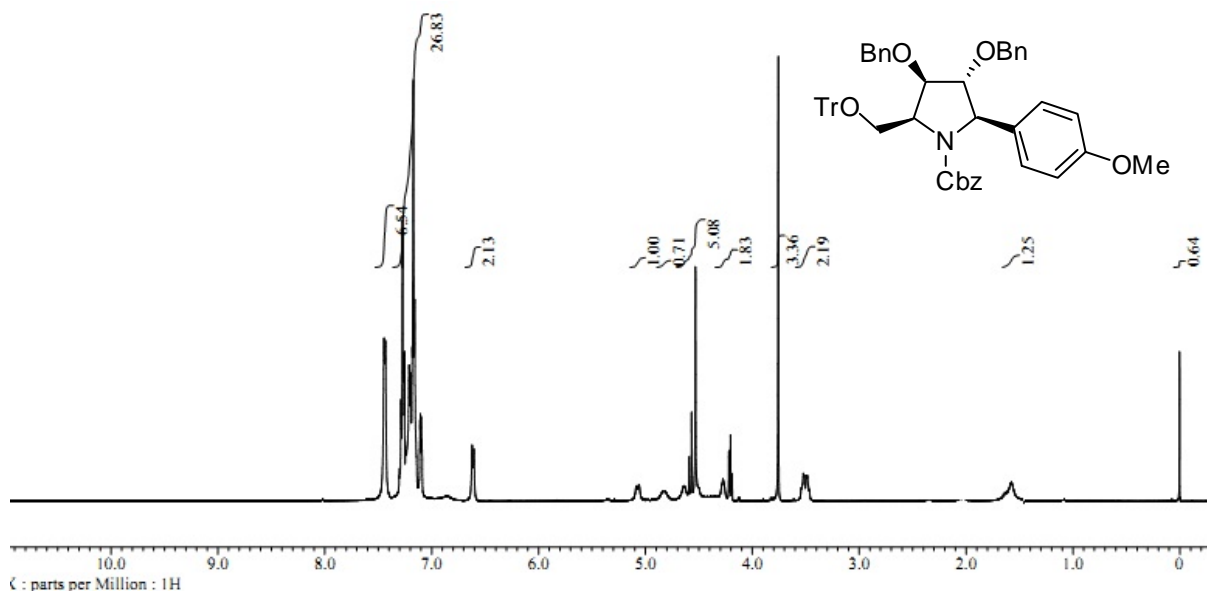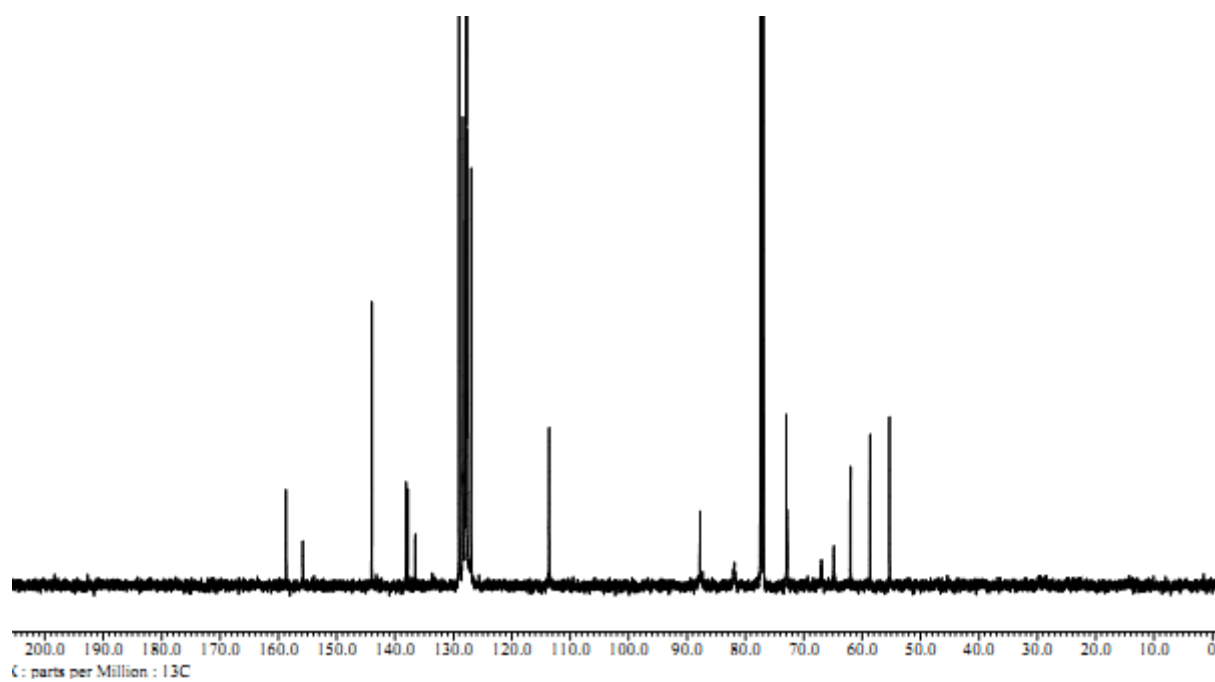



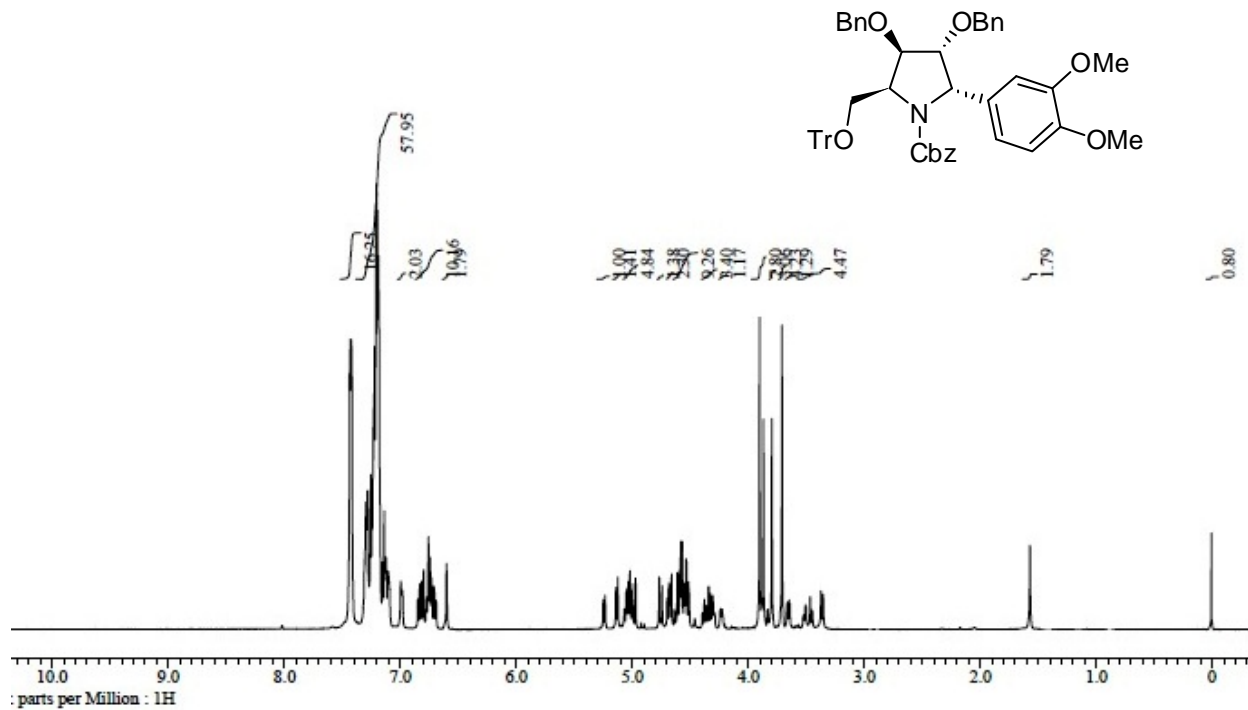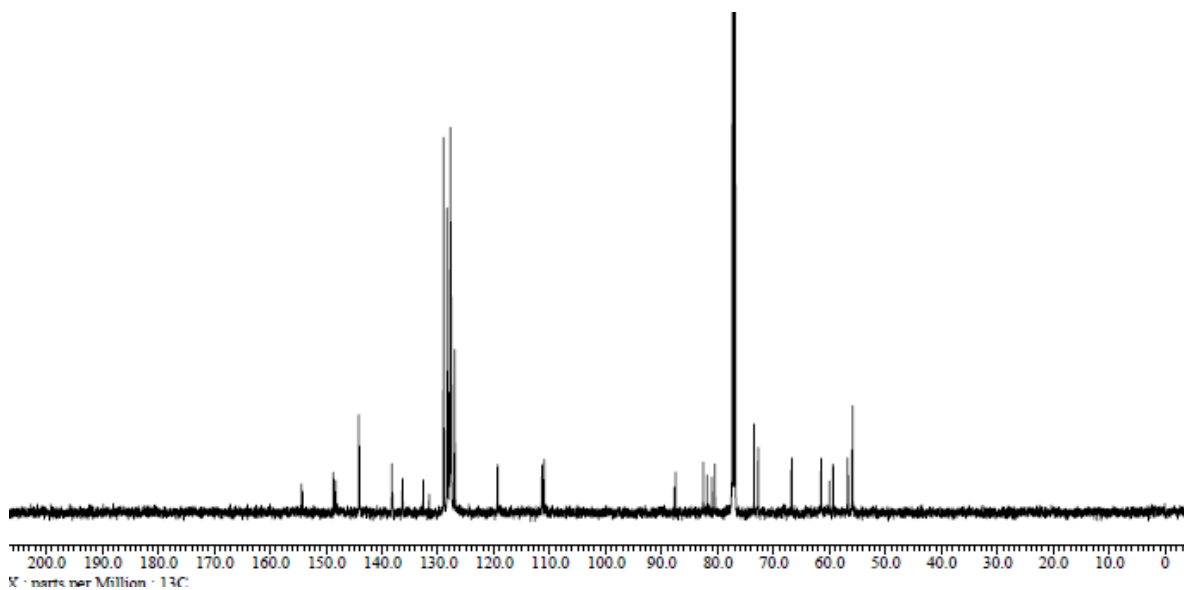

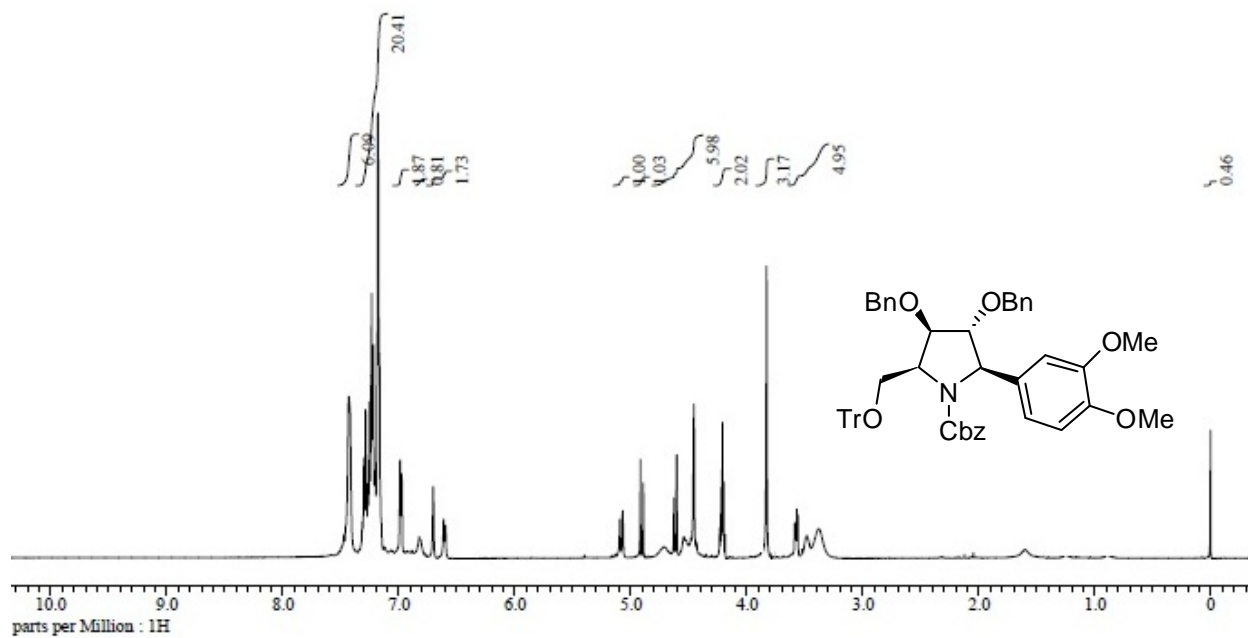

**Figure 28.1:**  $^1\text{H}$  NMR (500 MHz,  $\text{CDCl}_3$ ) Spectrum of Compound **26b**

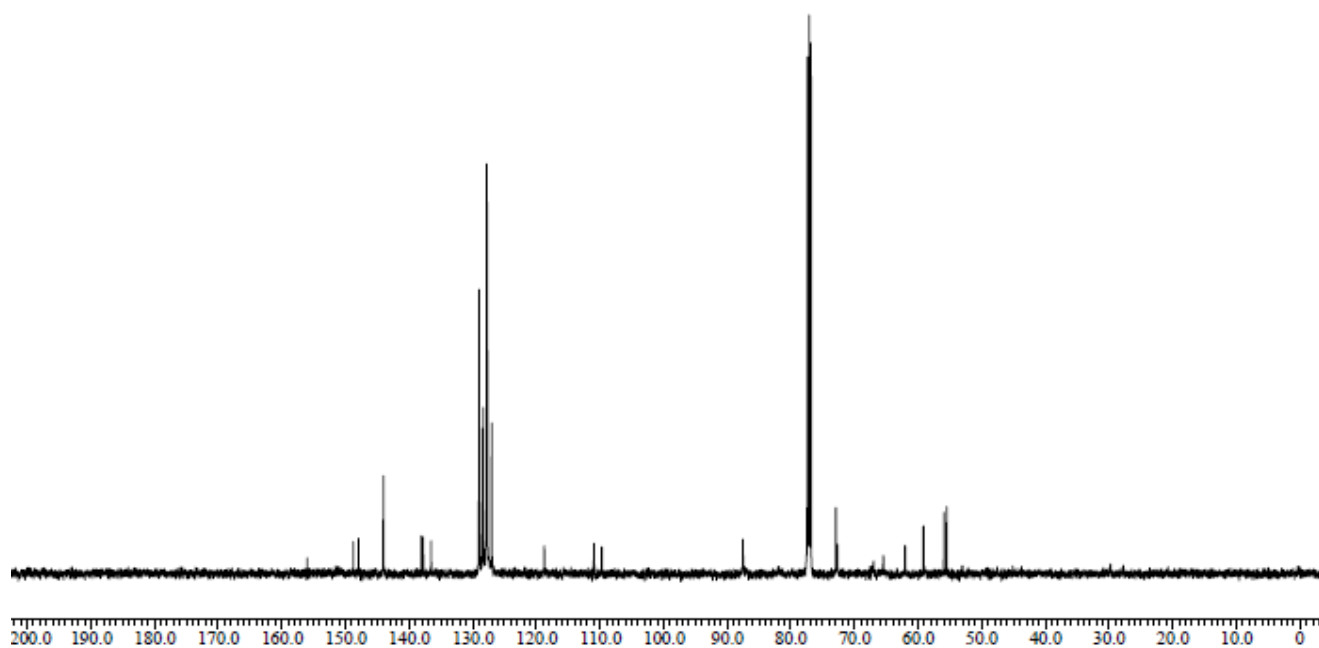

**Figure 28.2:**  $^{13}\text{C}$  NMR (125 MHz,  $\text{CDCl}_3$ ) Spectrum of Compound **26b**

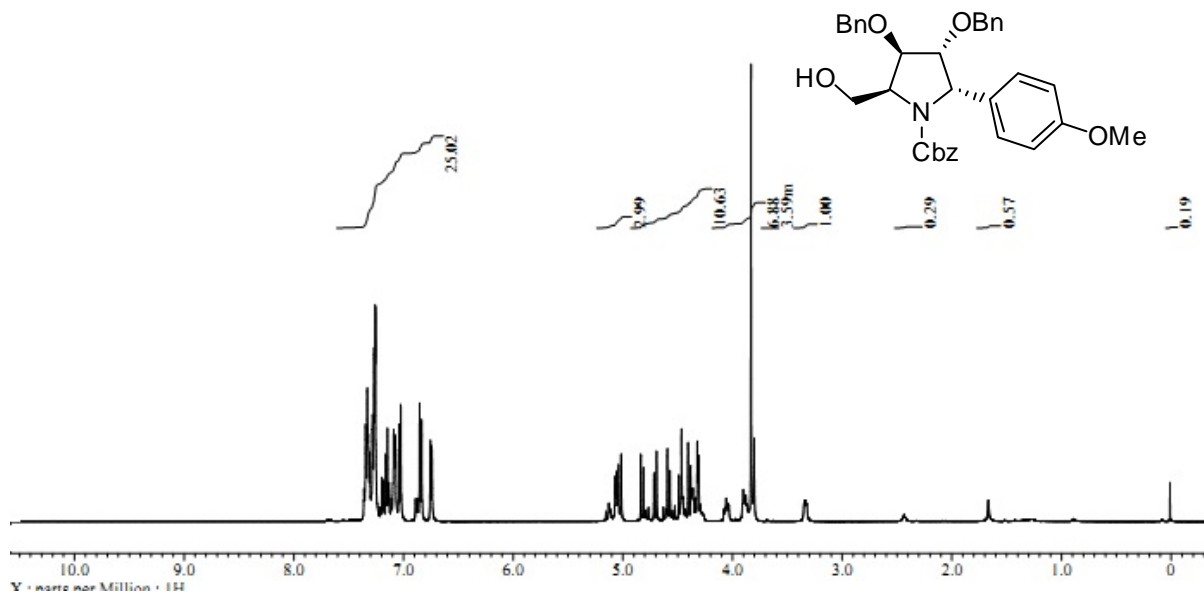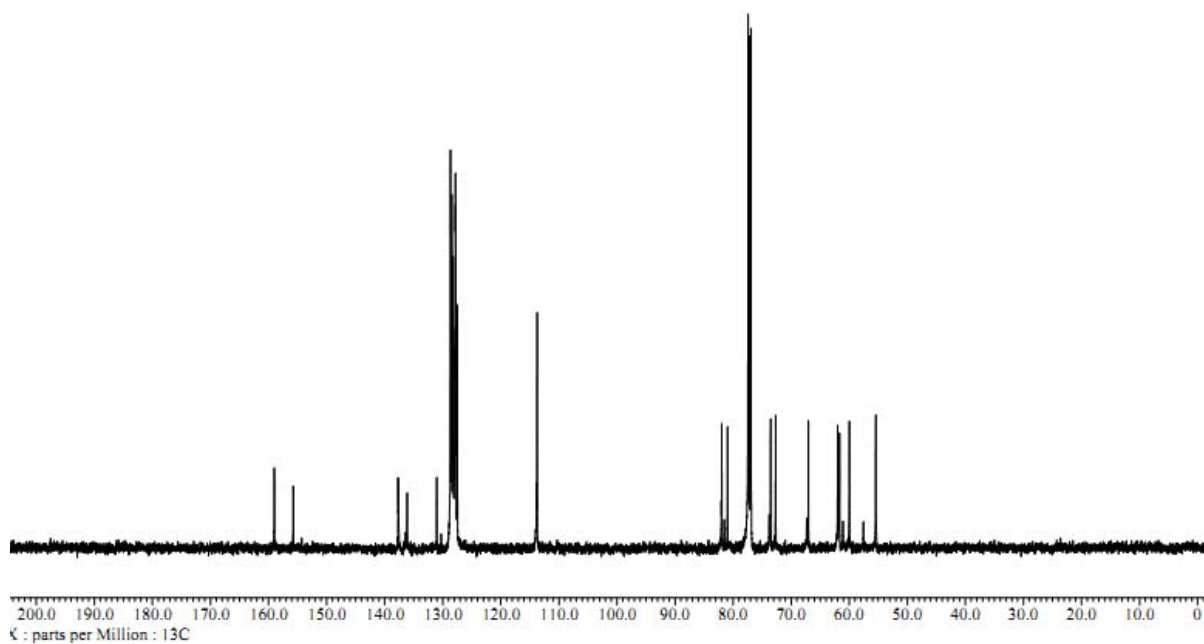

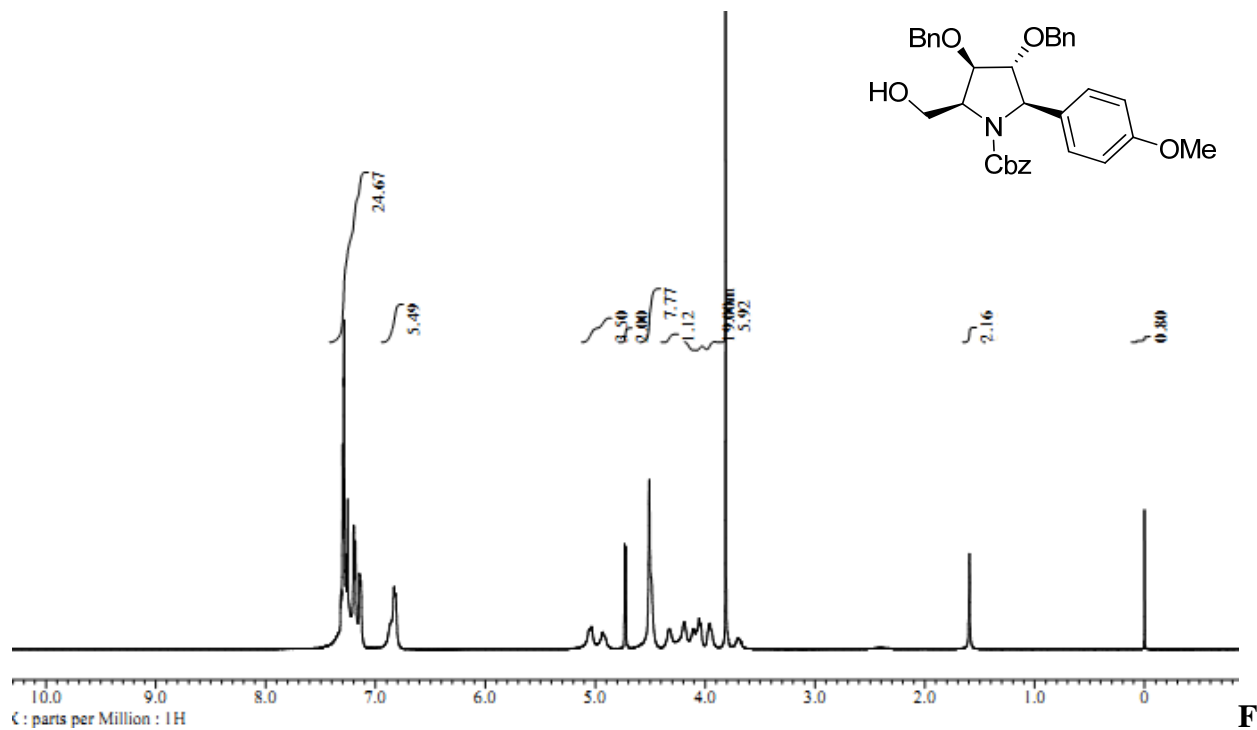

**figure 30.1:**  $^1\text{H}$  NMR (500 MHz,  $\text{CDCl}_3$ ) Spectrum of Compound 27b

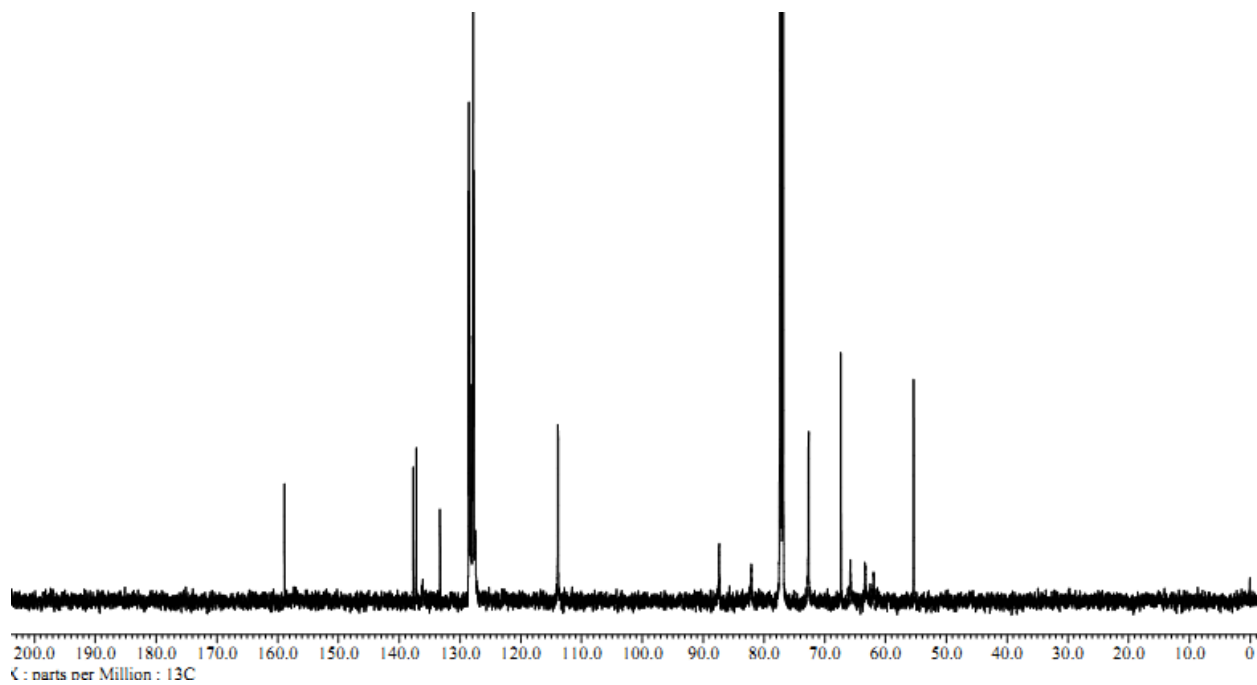

**Figure 30.2:**  $^{13}\text{C}$  NMR (125 MHz,  $\text{CDCl}_3$ ) Spectrum of Compound 27b

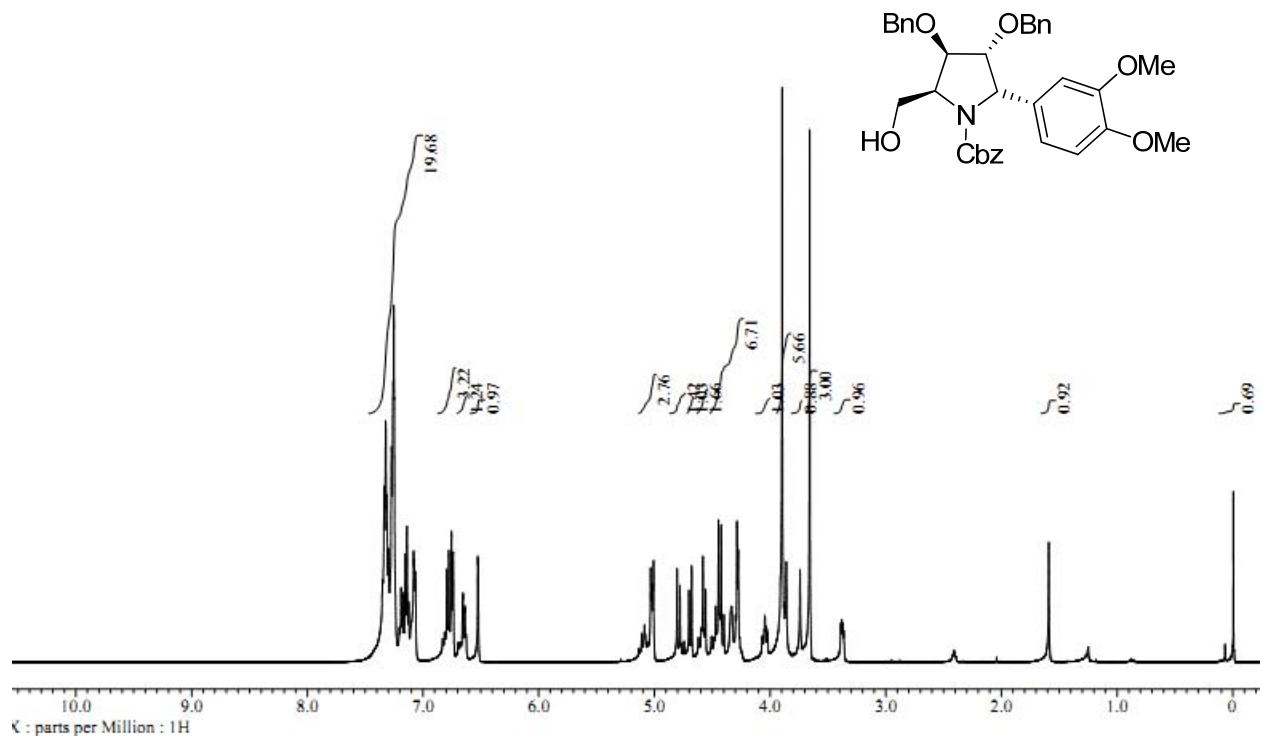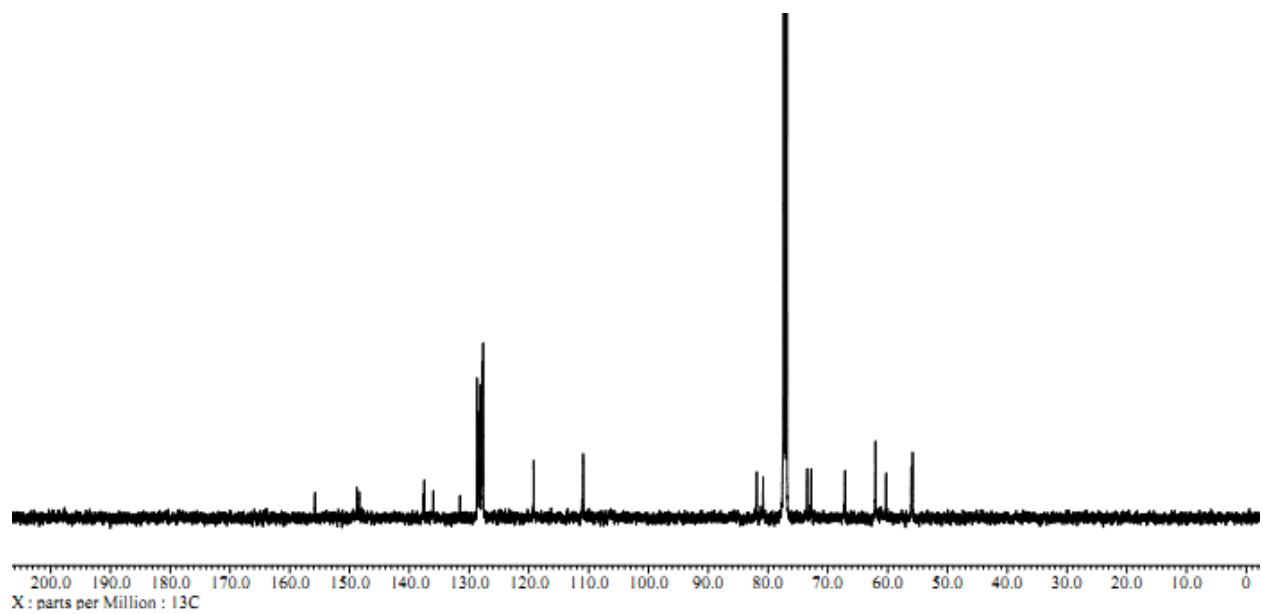

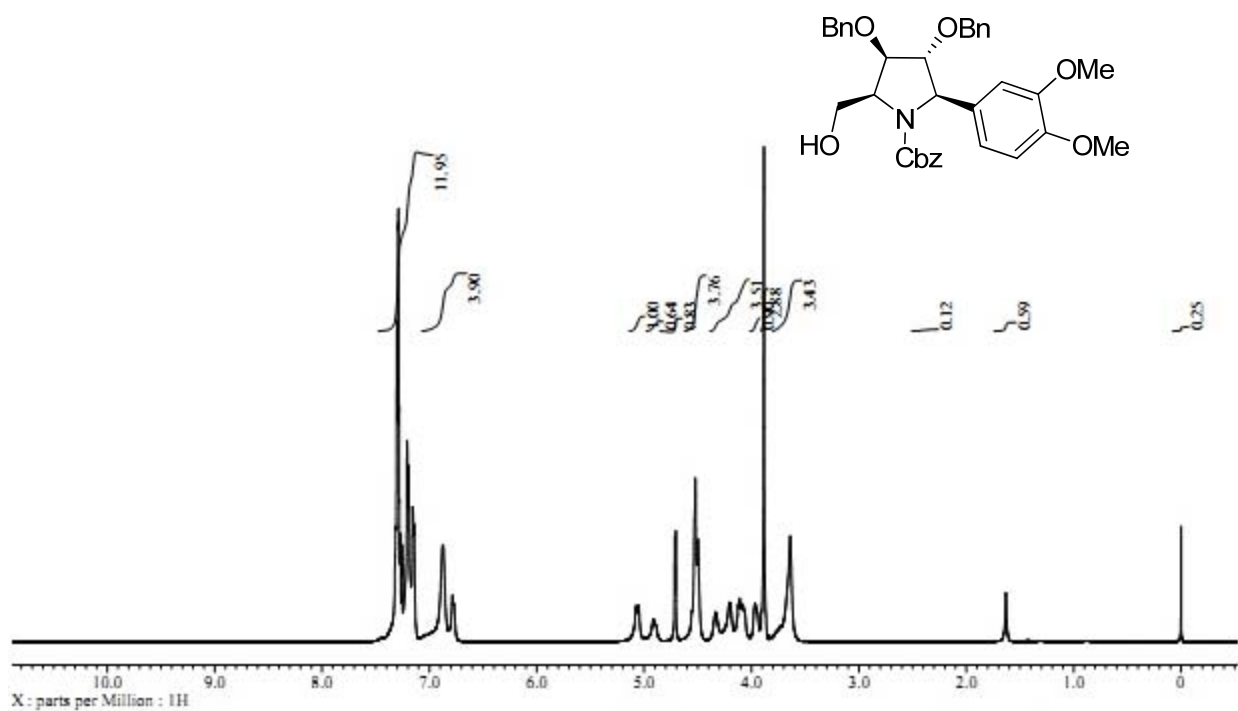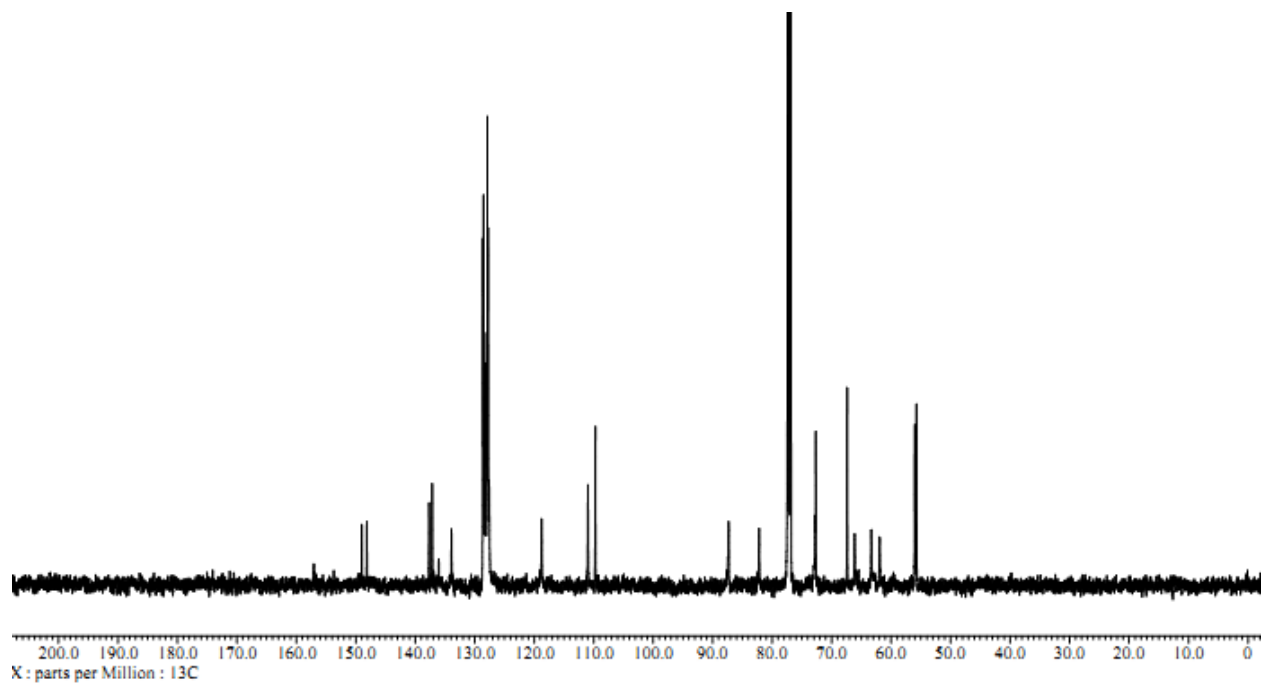

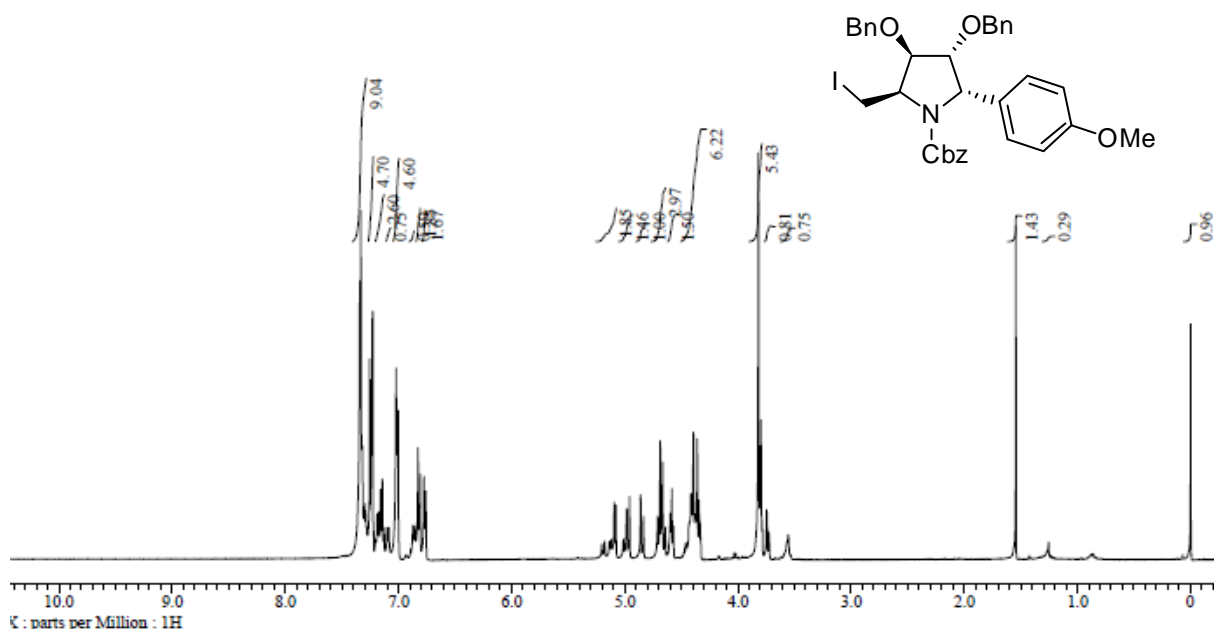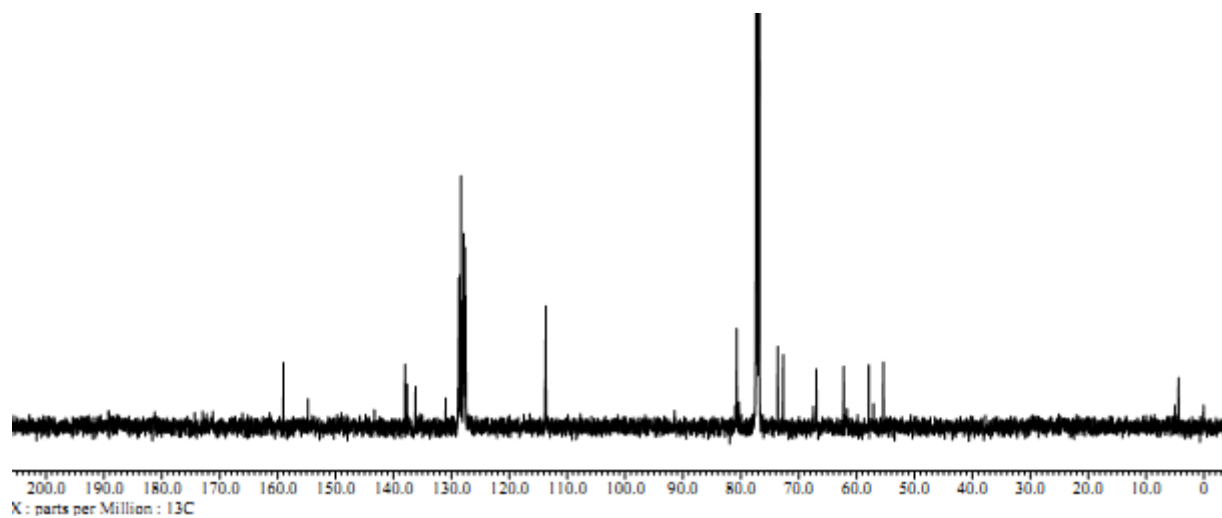

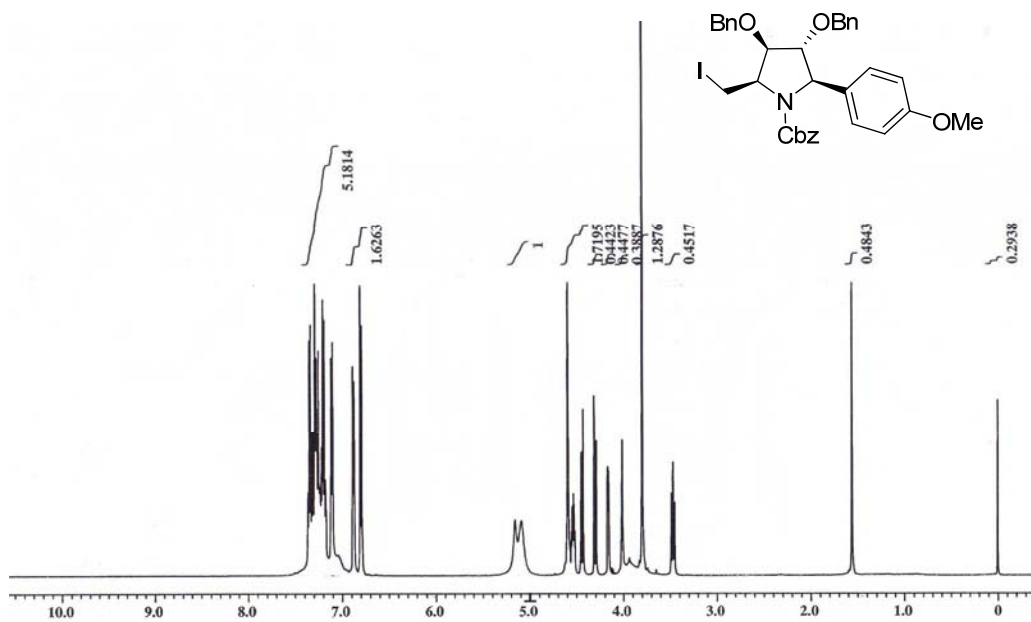

**Figure 34.1:**  $^1\text{H}$  NMR (500 MHz,  $\text{CDCl}_3$ ) Spectrum of Compound 29b

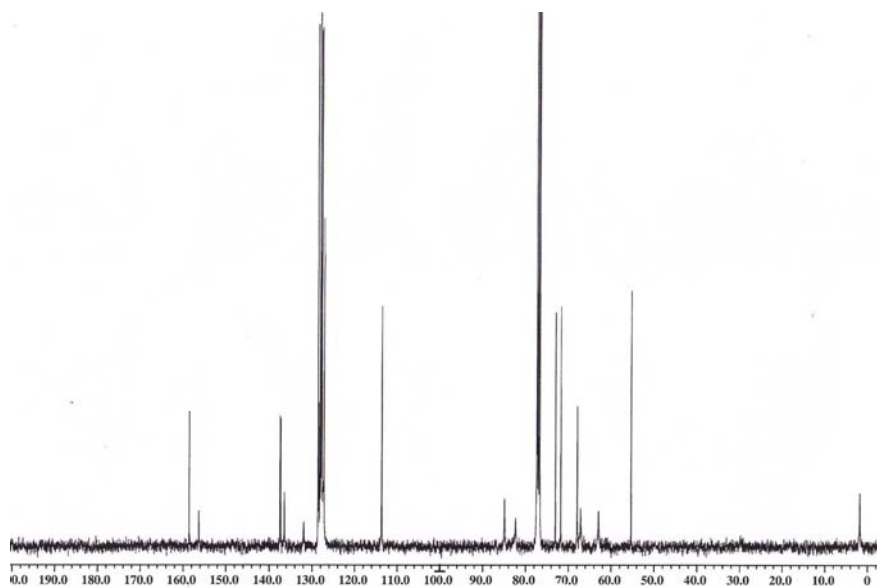

**Figure 34.2:**  $^{13}\text{C}$  NMR (100 MHz,  $\text{CDCl}_3$ ) Spectrum of Compound 29b



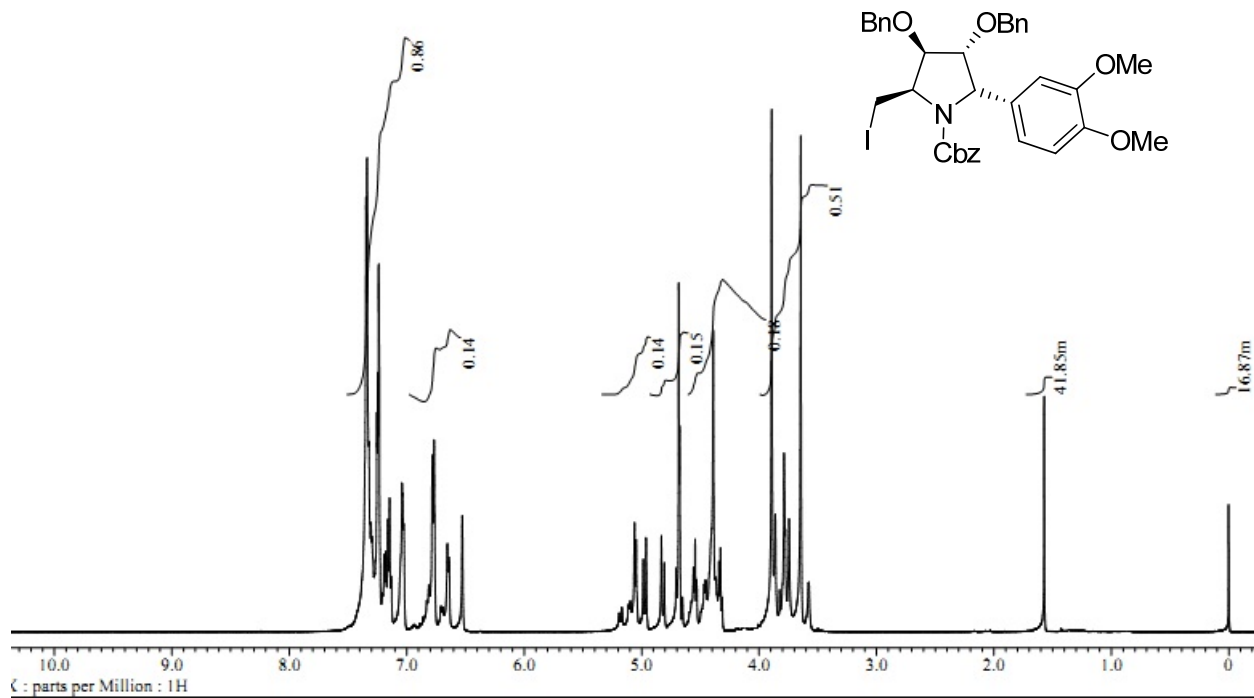

**Figure 35.1:**  $^1\text{H NMR}$  (500 MHz,  $\text{CDCl}_3$ ) Spectrum of Compound 30a

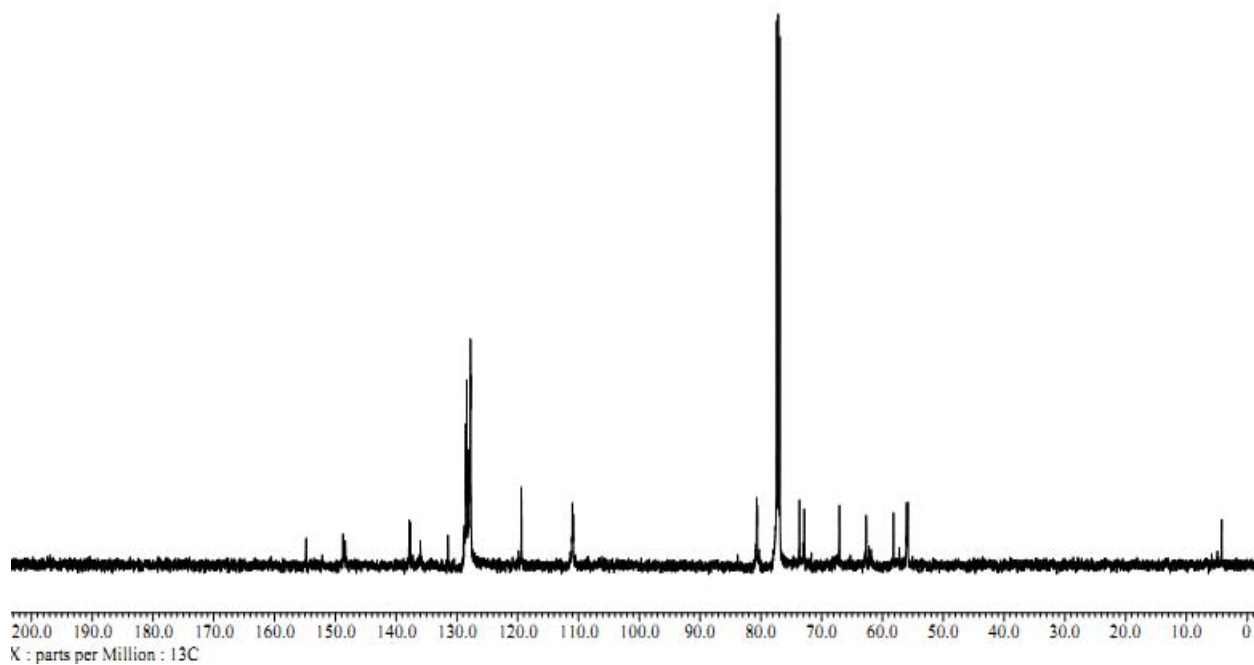

**Figure 35.2:**  $^{13}\text{C NMR}$  (125 MHz,  $\text{CDCl}_3$ ) Spectrum of Compound 30a

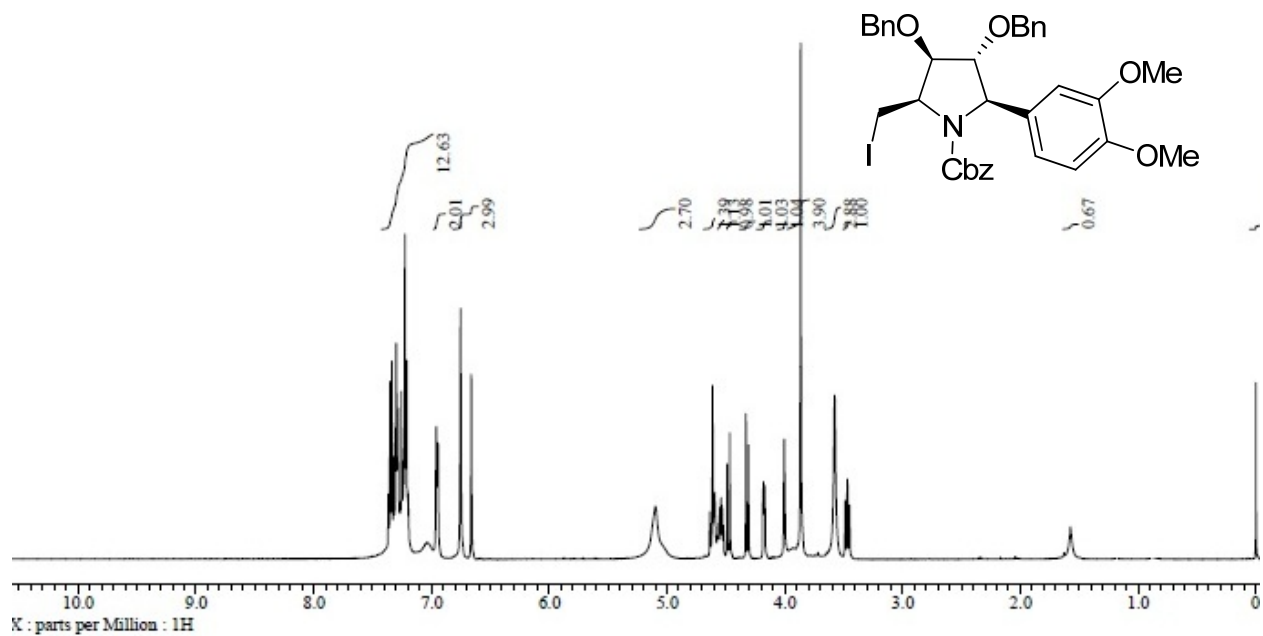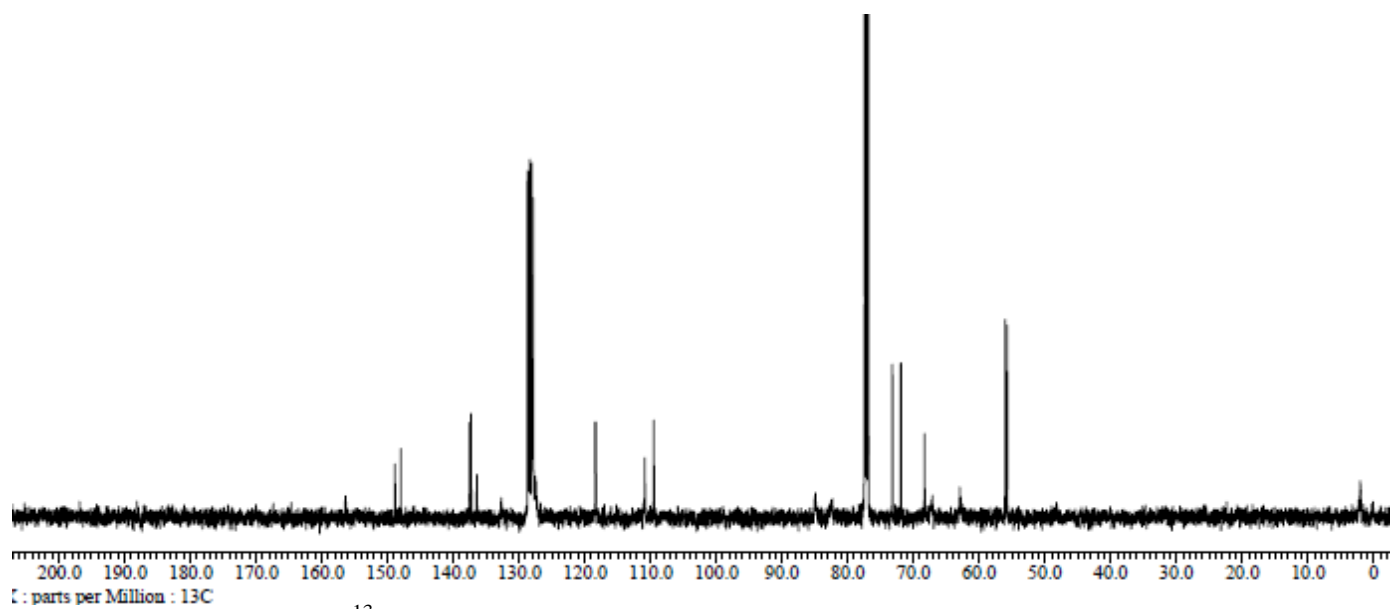

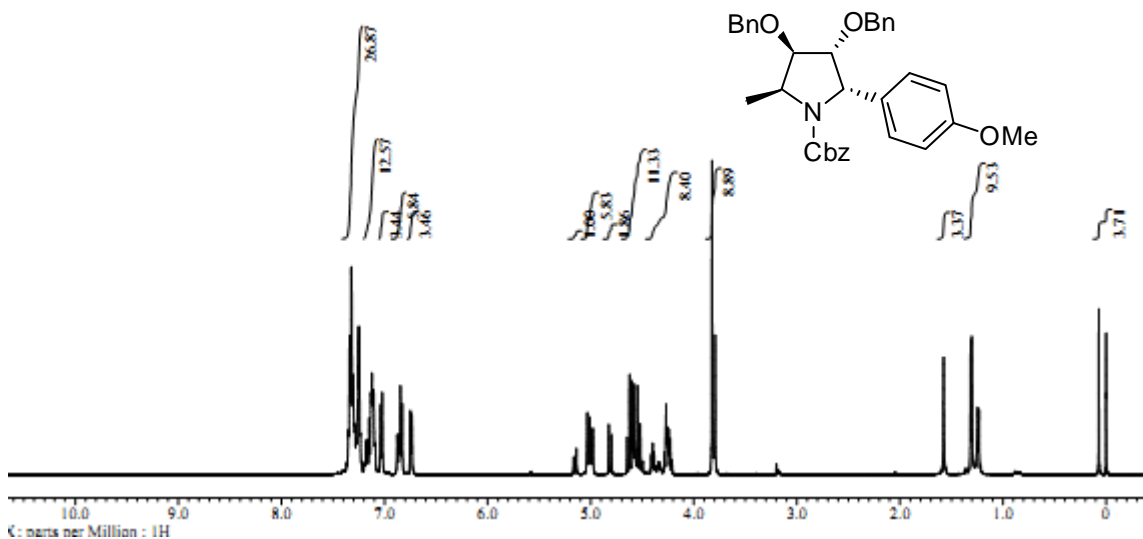

**Figure 37.1:**  $^1\text{H}$  NMR (500 MHz,  $\text{CDCl}_3$ ) Spectrum of Compound **31a**

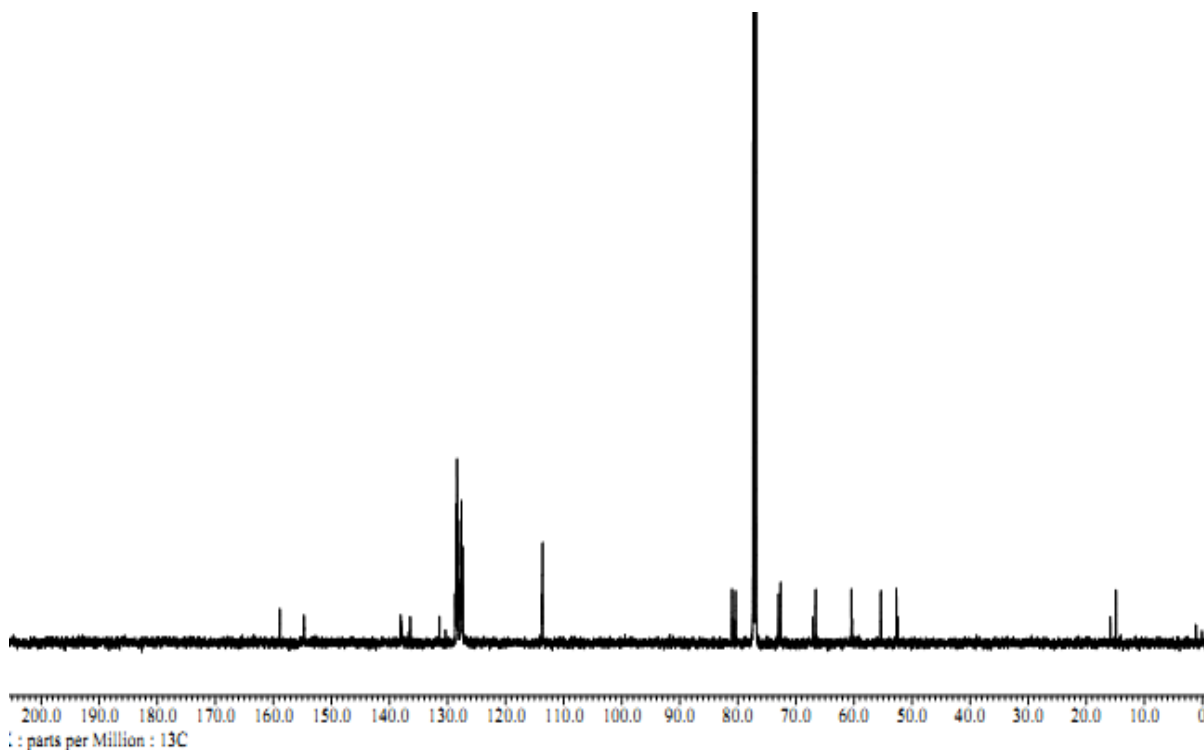

**Figure 37.2:**  $^{13}\text{C}$  NMR (125 MHz,  $\text{CDCl}_3$ ) Spectrum of Compound **31a**

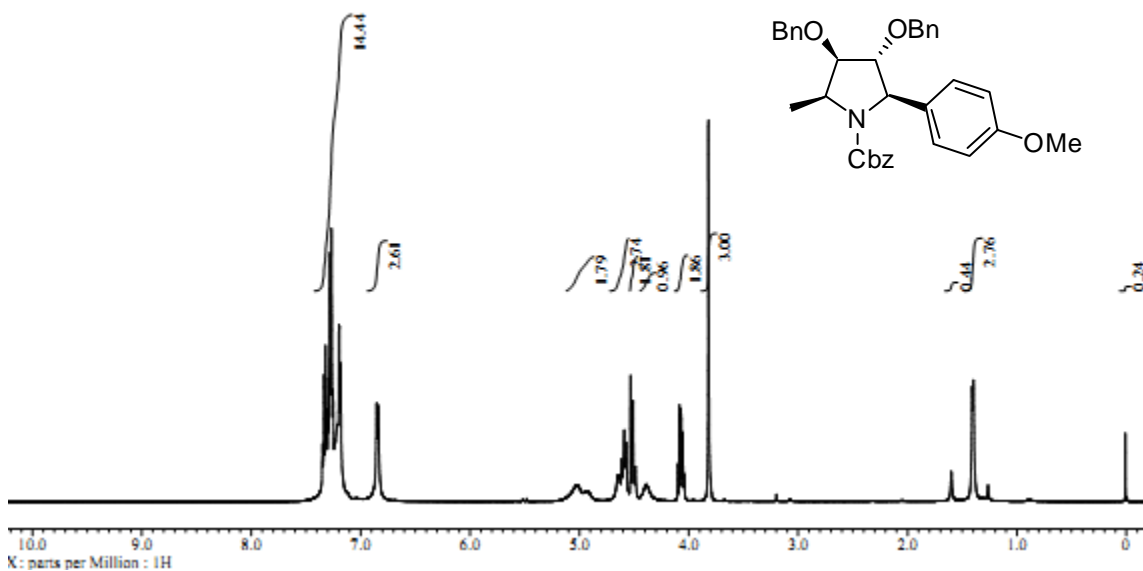

**Figure 38.1:**  $^1\text{H}$  NMR (500 MHz,  $\text{CDCl}_3$ ) Spectrum of Compound **31b**

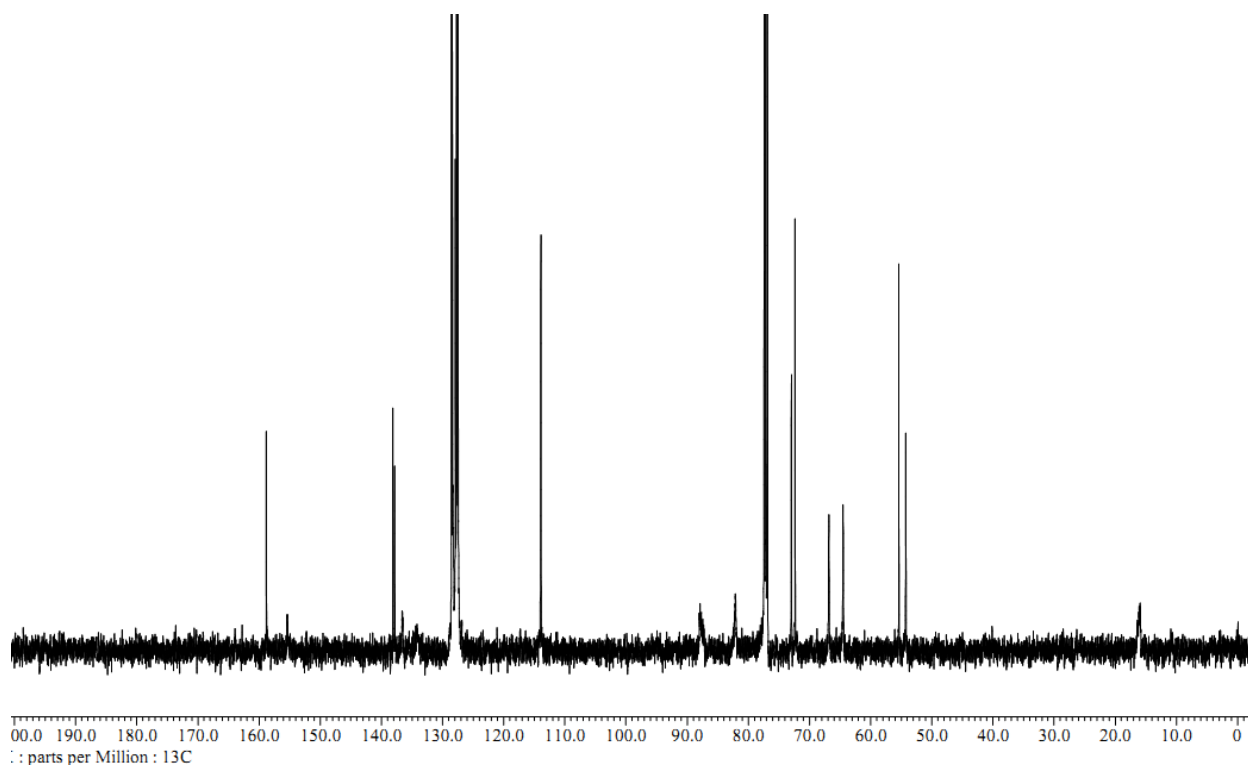

**Figure 38.2:**  $^{13}\text{C}$  NMR (125 MHz,  $\text{CDCl}_3$ ) Spectrum of Compound **31b**

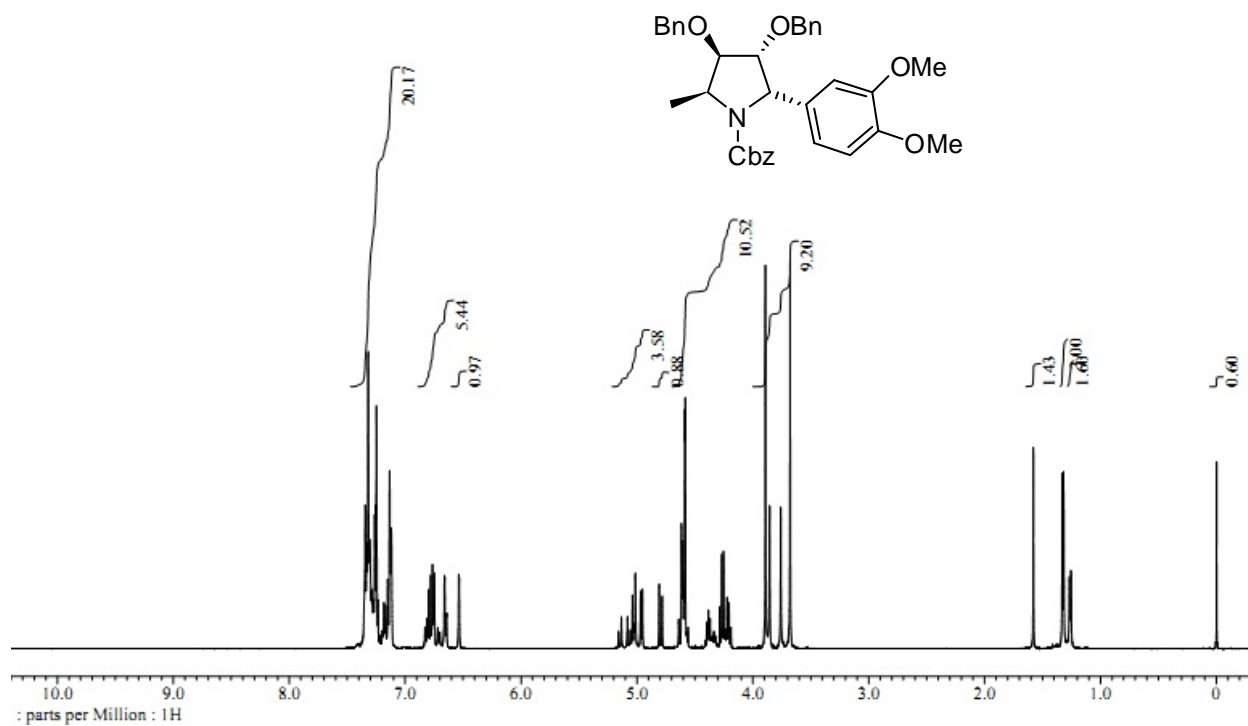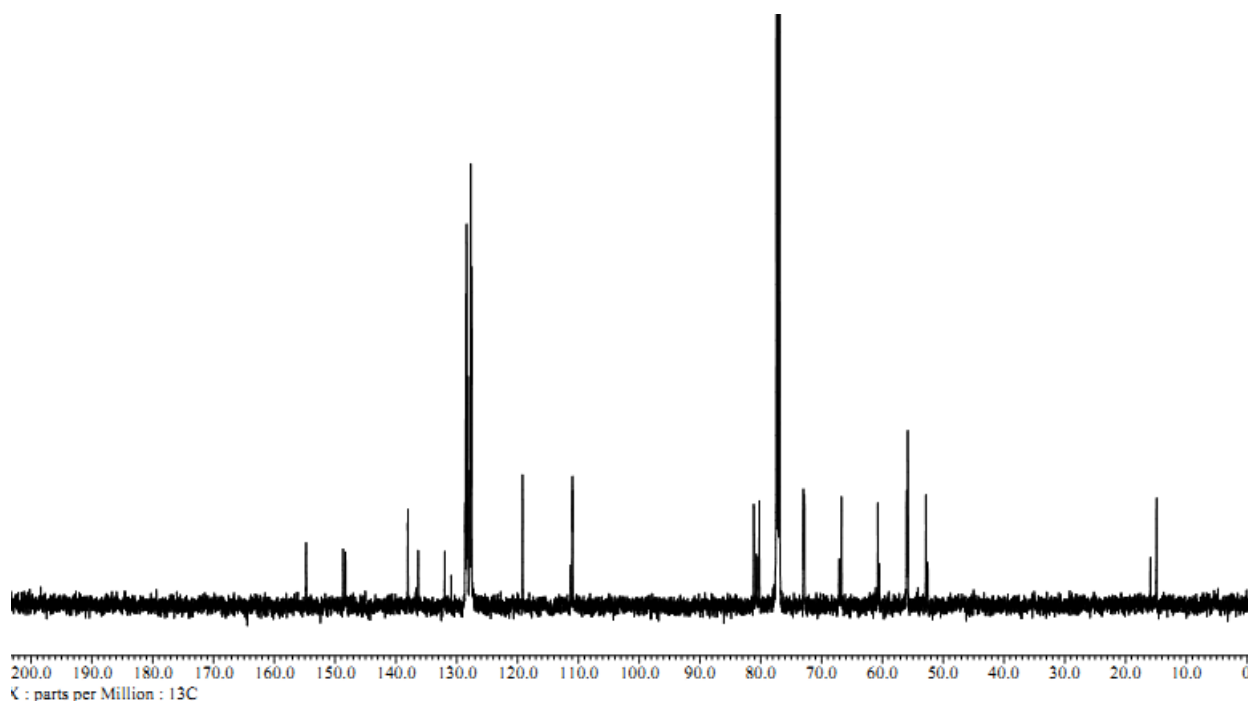

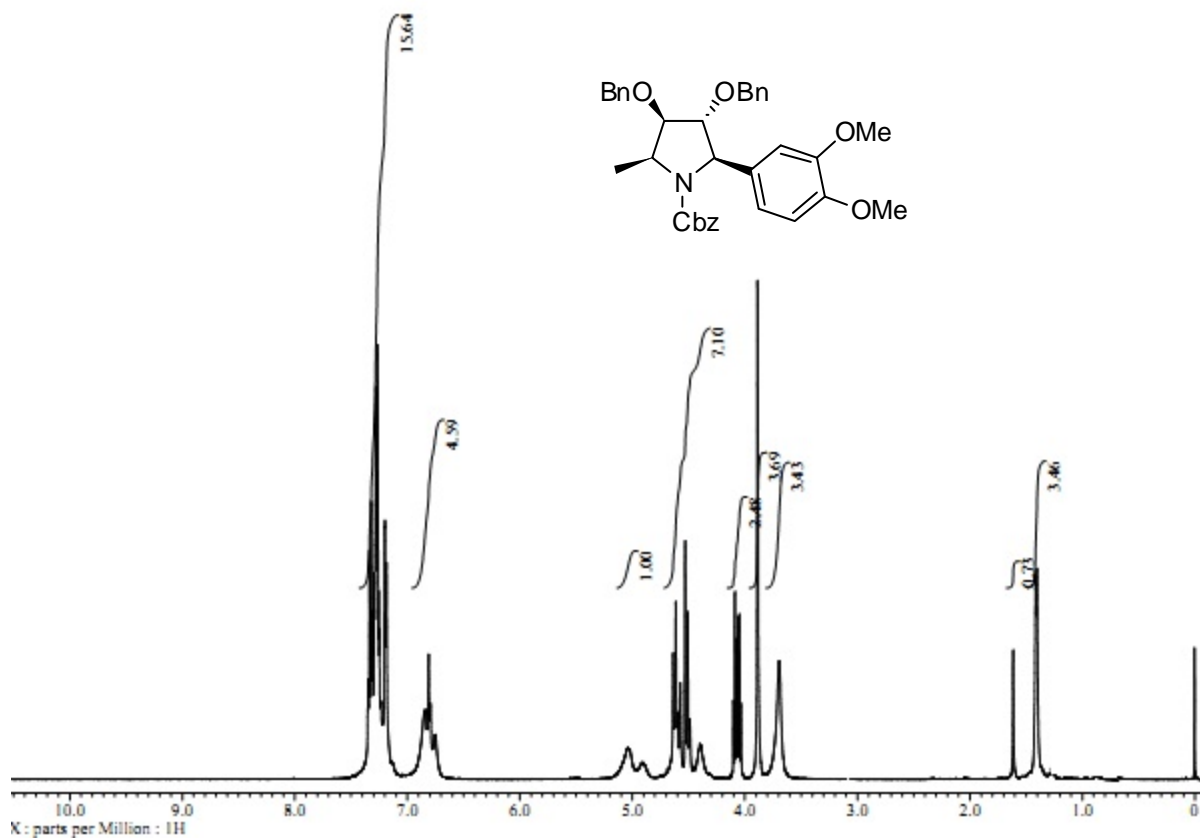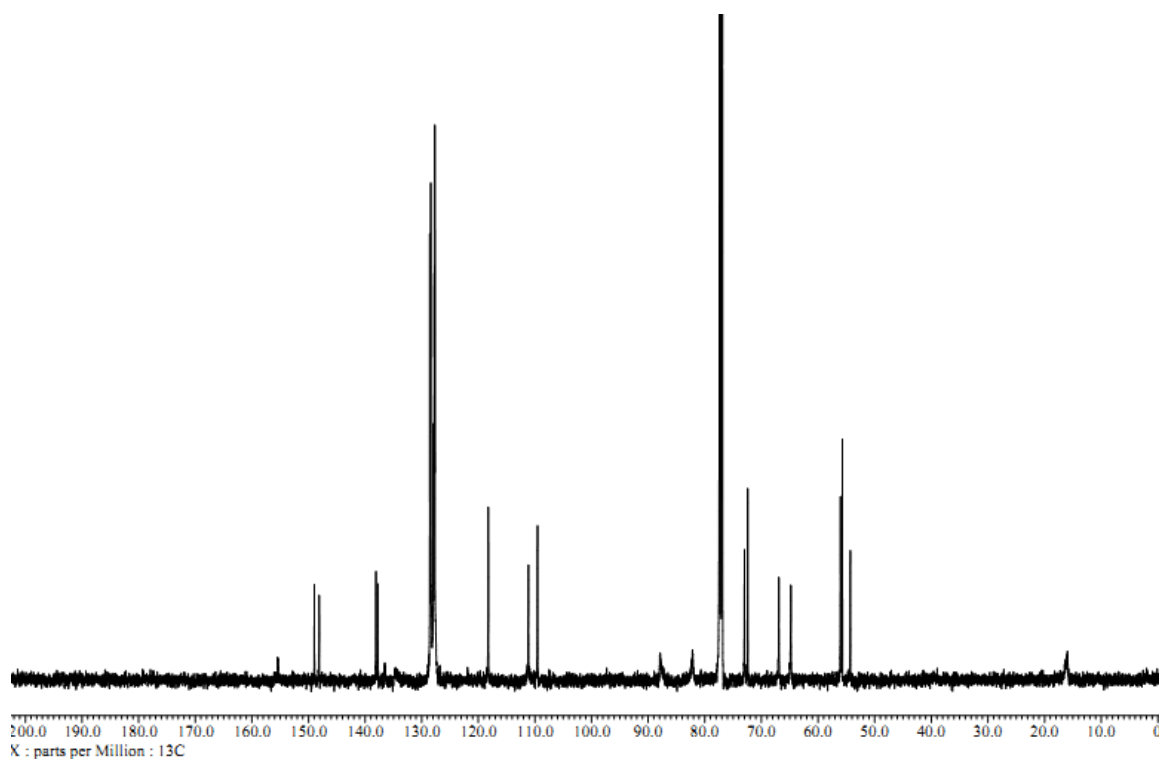



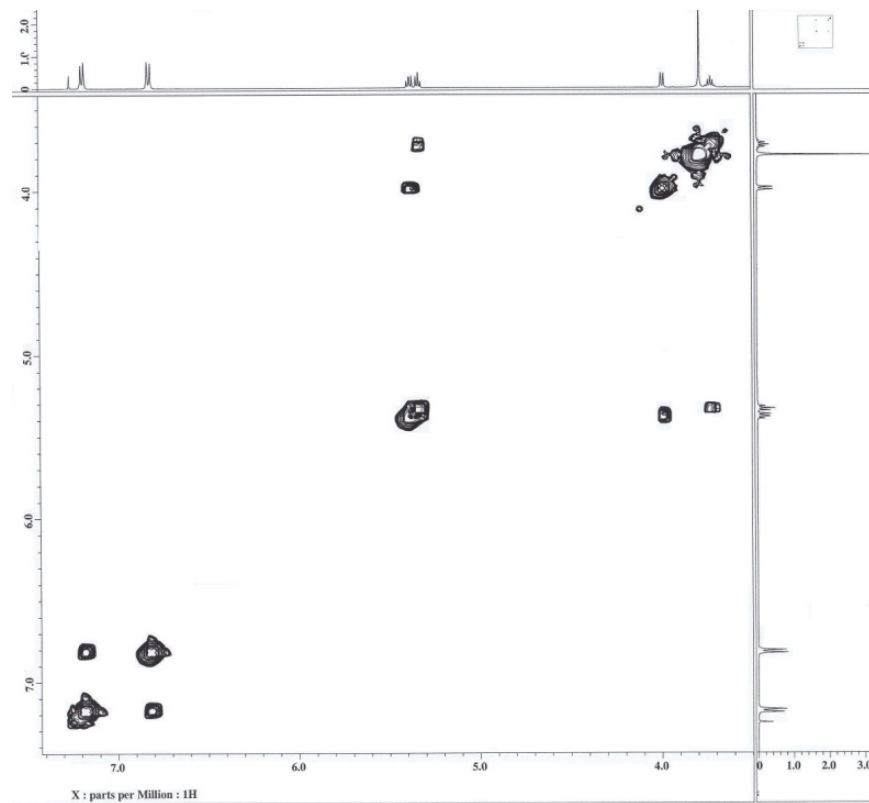

**Figure 41.3:**  $^1\text{H}$ - $^1\text{H}$  COSY Spectrum of Compound **33a**

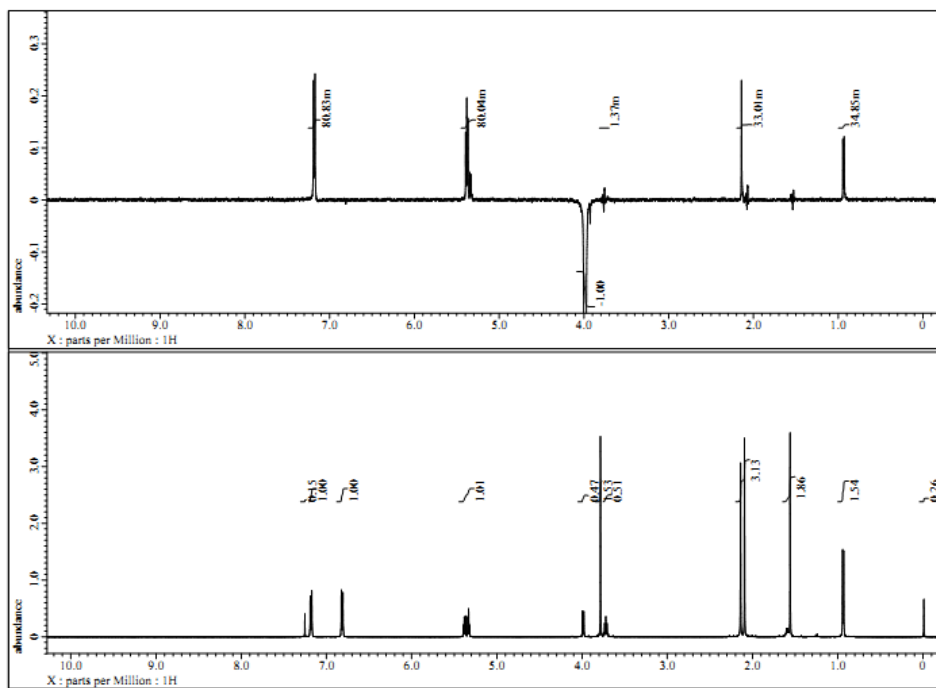

**Figure 41.4:** NOE Irradiation Spectrum of H-2 proton of Compound **33a**



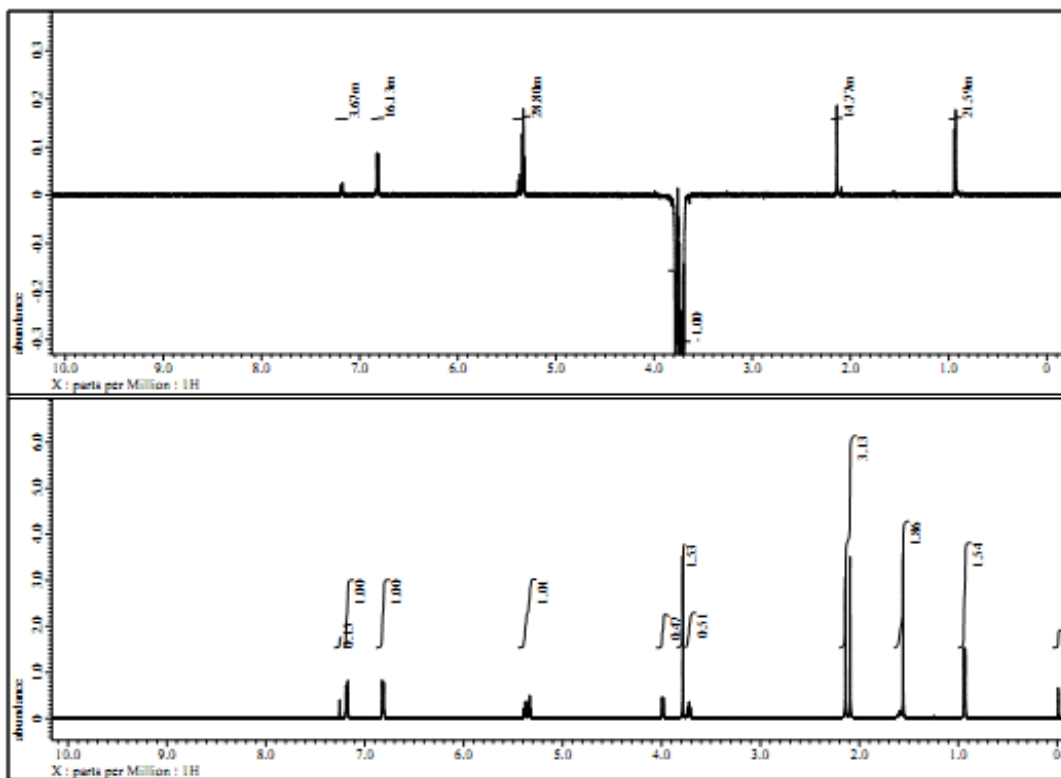

**Figure 41.5:** NOE Irradiation Spectrum of H-5 proton of Compound **33a**

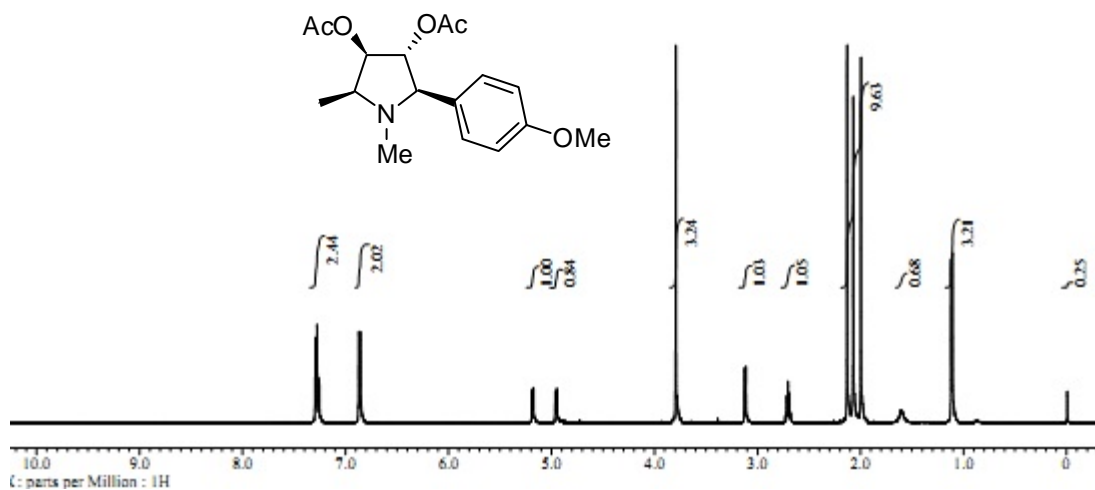

**Figure 42.1:**  $^1\text{H NMR}$  (500 MHz,  $\text{CDCl}_3$ ) Spectrum of Compound 33b

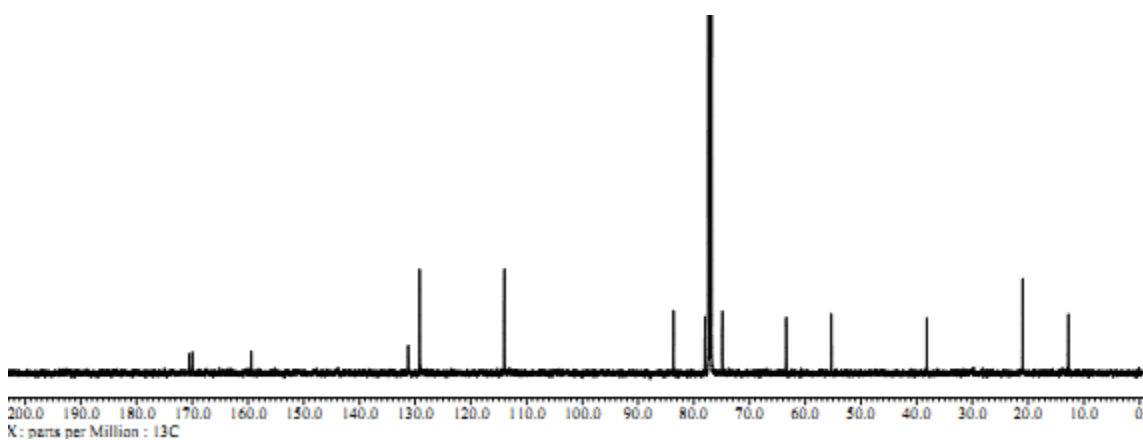

**Figure 42.2:**  $^{13}\text{C NMR}$  (125 MHz,  $\text{CDCl}_3$ ) Spectrum of Compound 33b

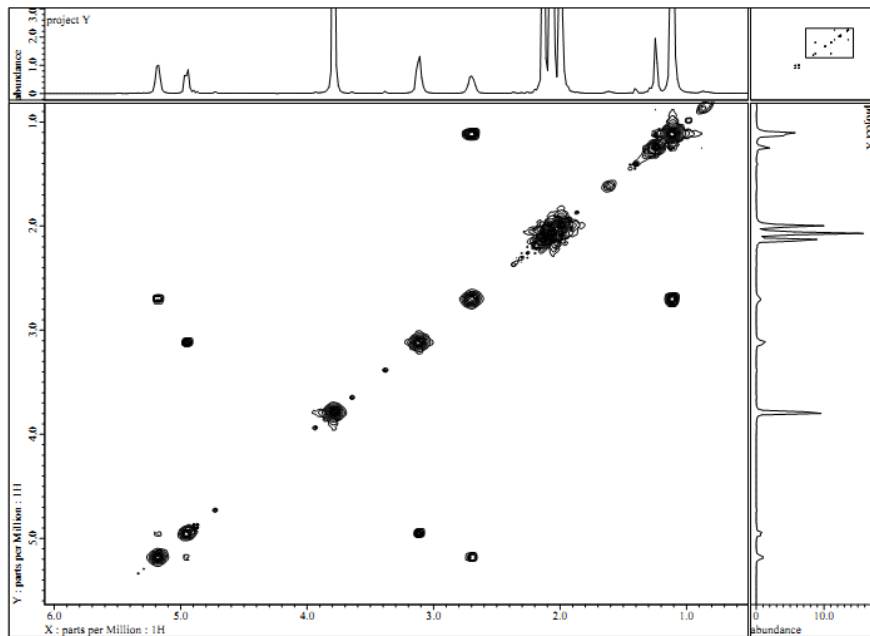

**Figure 42.3:**  $^1\text{H}$ - $^1\text{H}$  COSY Spectrum of Compound **33b**

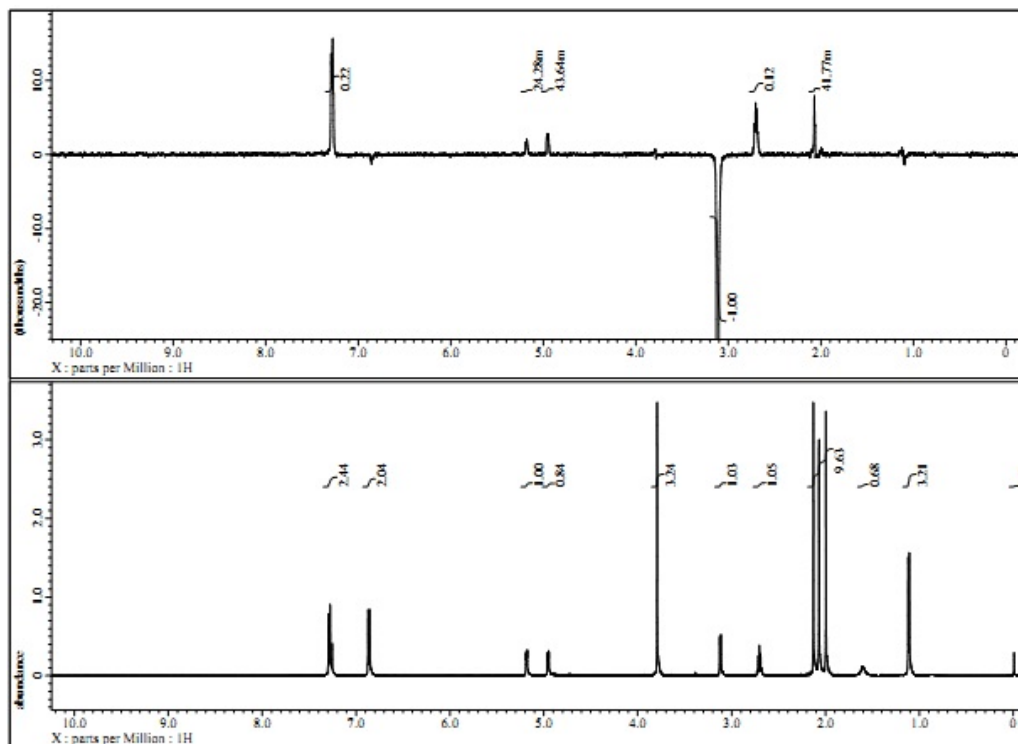

**Figure 42.4:** NOE Irradiation Spectrum of H-2 proton of Compound **33b**

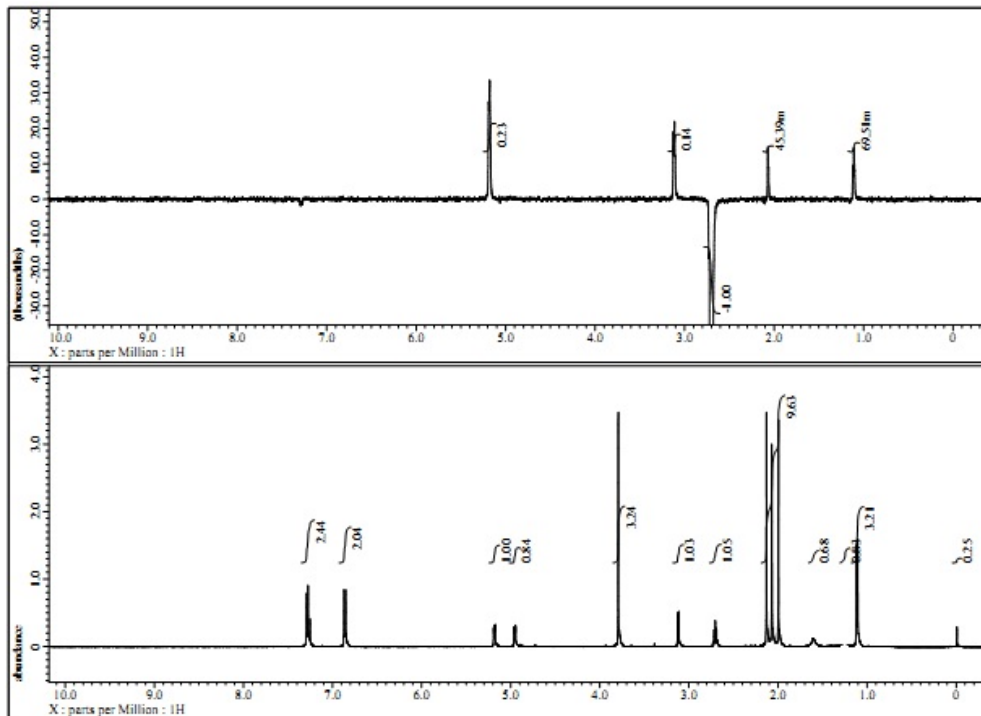

**Figure 42.5:** NOE Irradiation Spectrum of H-2 proton of Compound **33b**

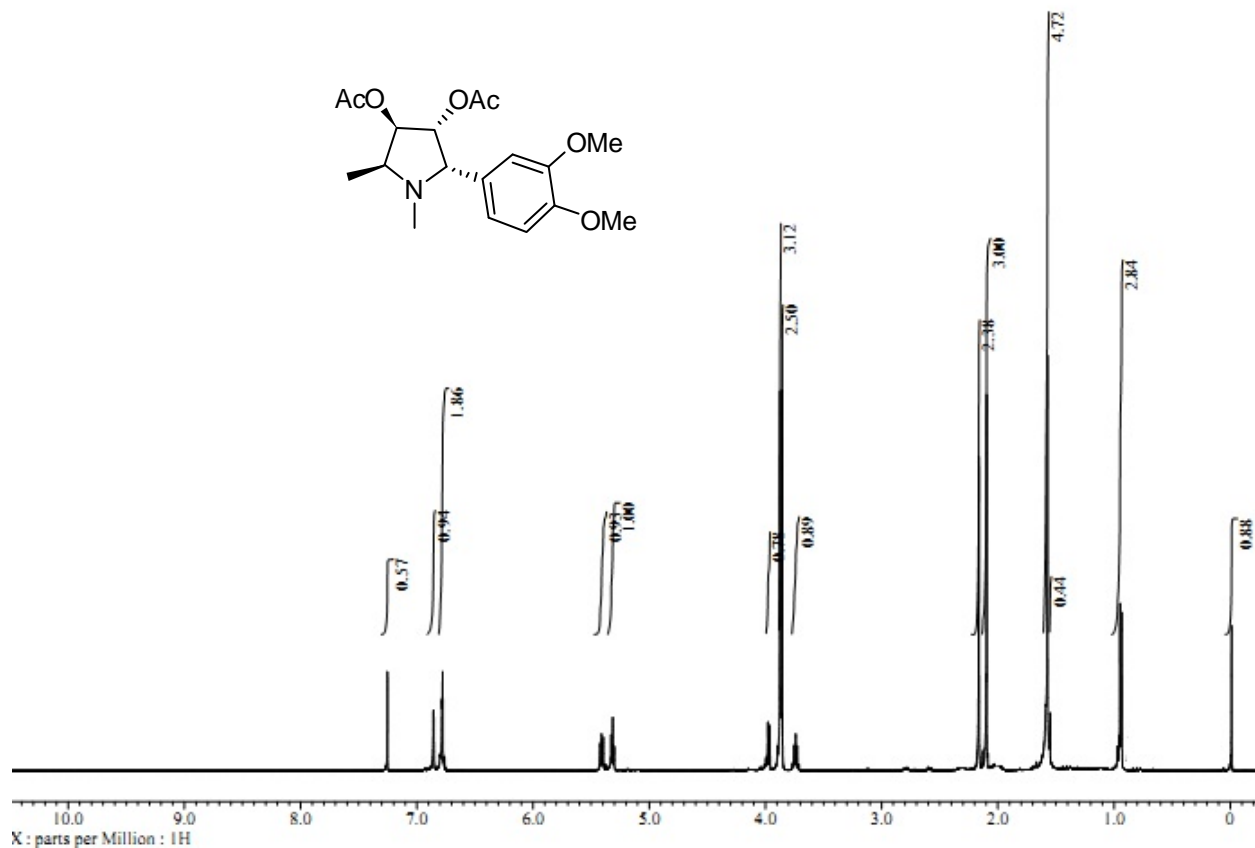

**Figure 43.1:** <sup>1</sup>H NMR (500 MHz, CDCl<sub>3</sub>) Spectrum of Compound 34a

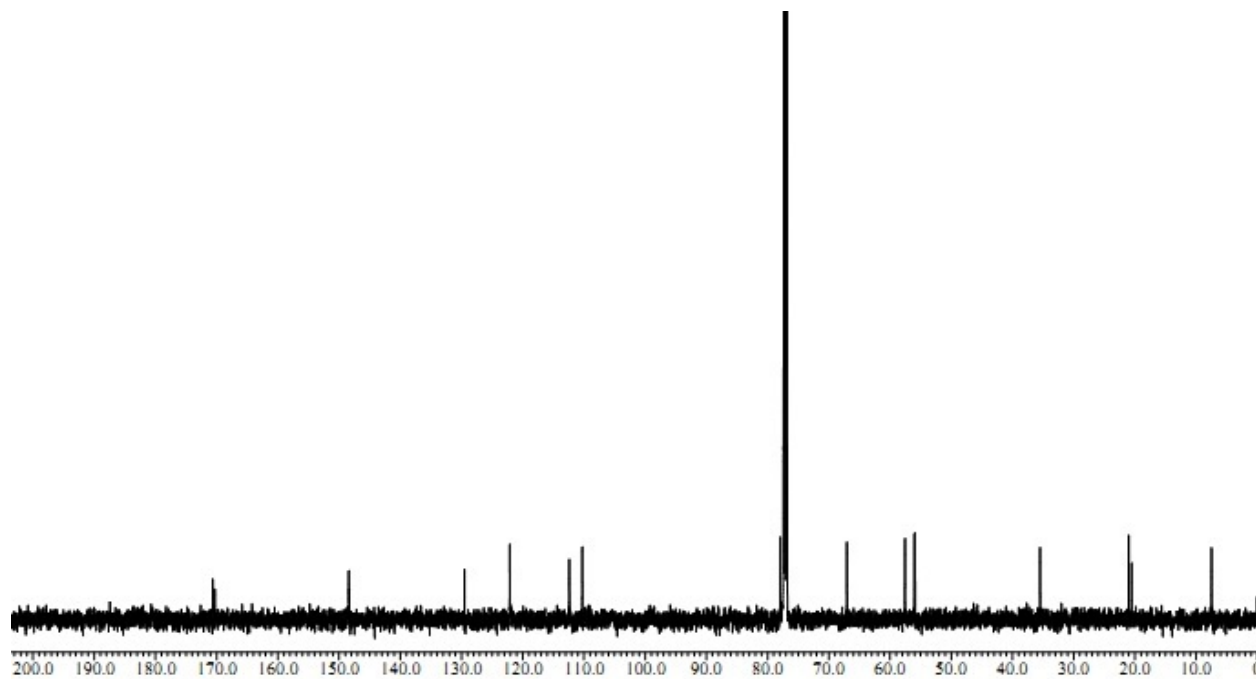

**Figure 43.2:** <sup>13</sup>C NMR (125 MHz, CDCl<sub>3</sub>) Spectrum of Compound 34a

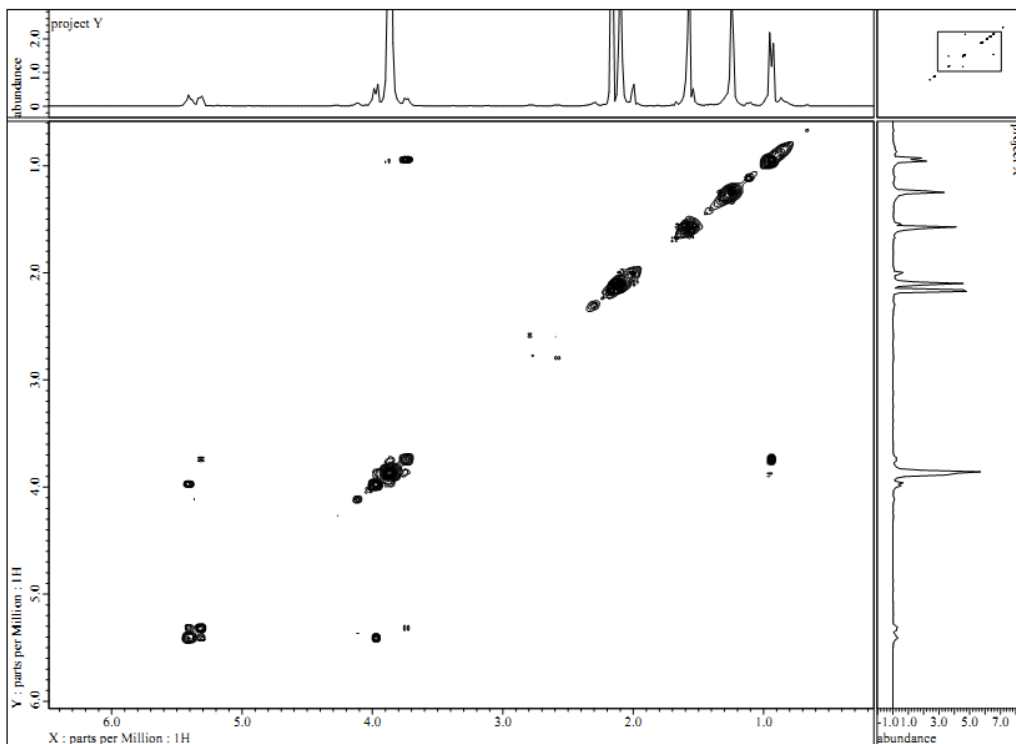

Figure 43.3:  $^1\text{H}$ - $^1\text{H}$  COSY Spectrum of Compound **34a**

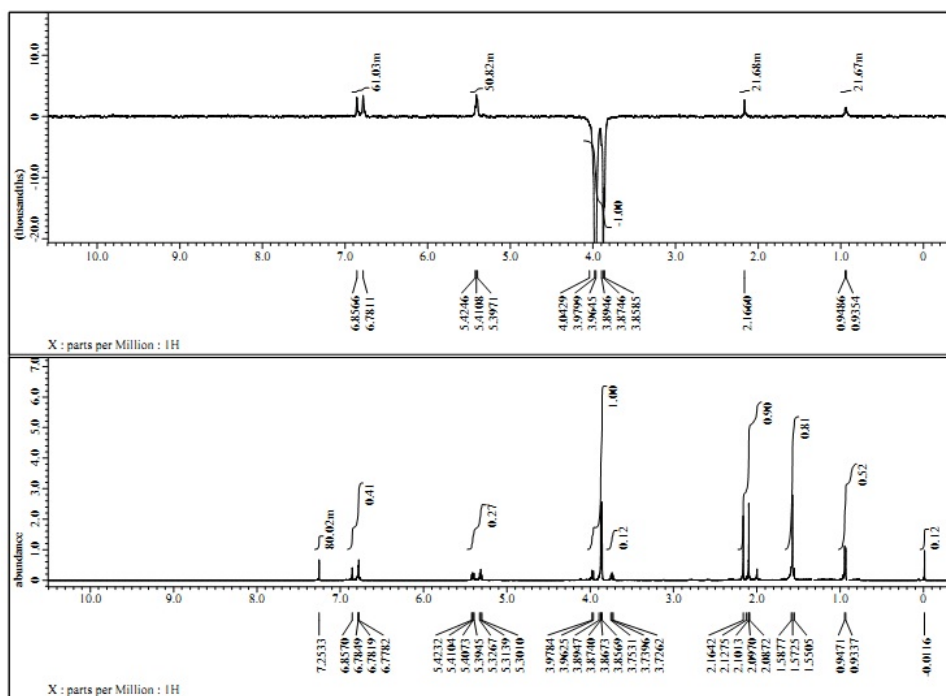

Figure 43.4: NOE irradiation of H-2 proton Spectrum of Compound **34a**

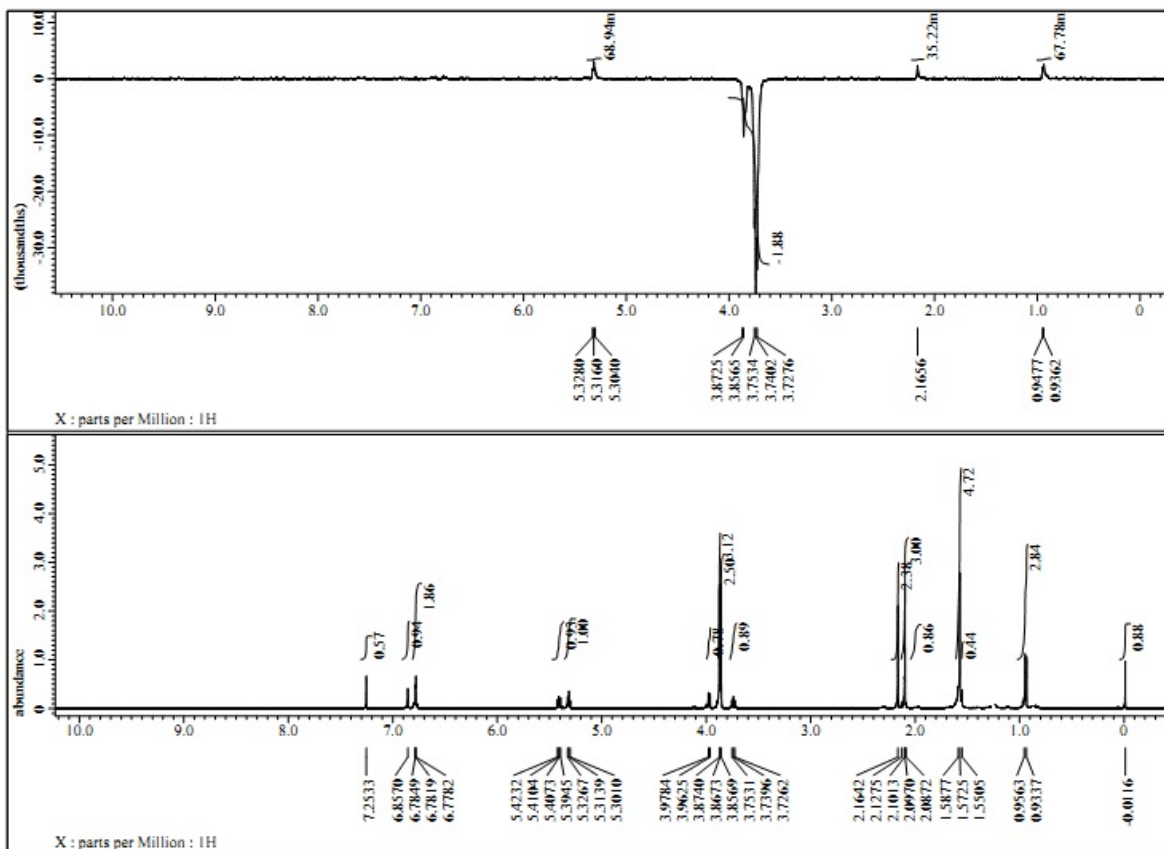

**Figure 43.5:** NOE irradiation of H-5 proton Spectrum of Compound 34a

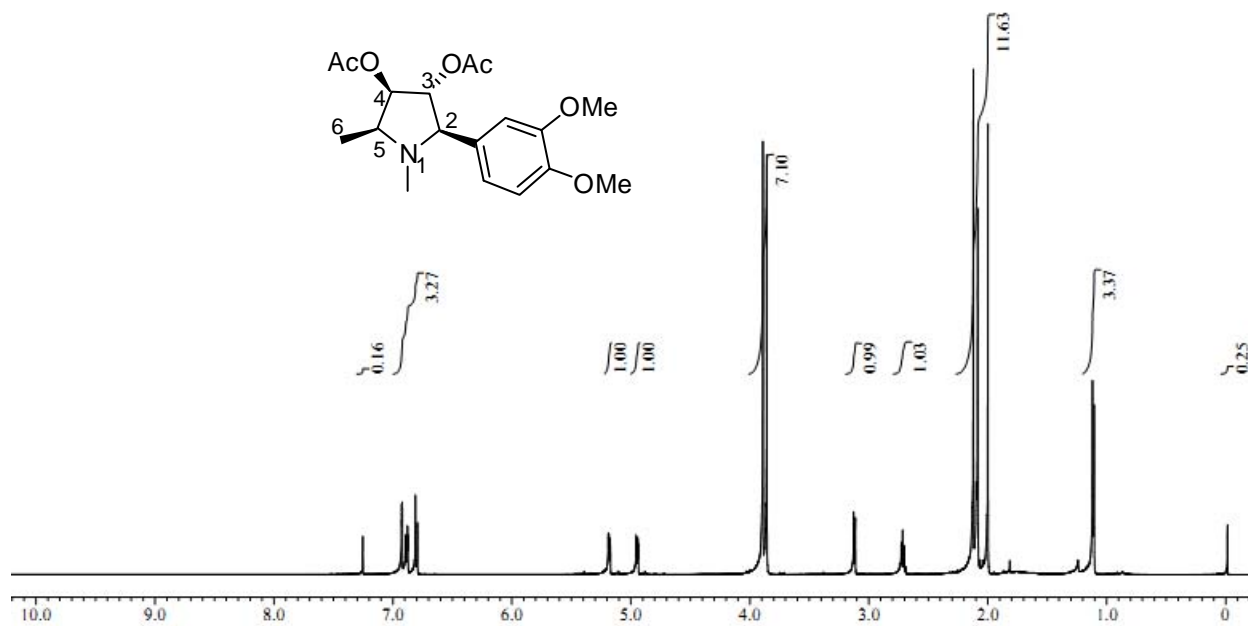

**Figure 44.1:** <sup>1</sup>H NMR (500 MHz, CDCl<sub>3</sub>) Spectrum of Compound 34b

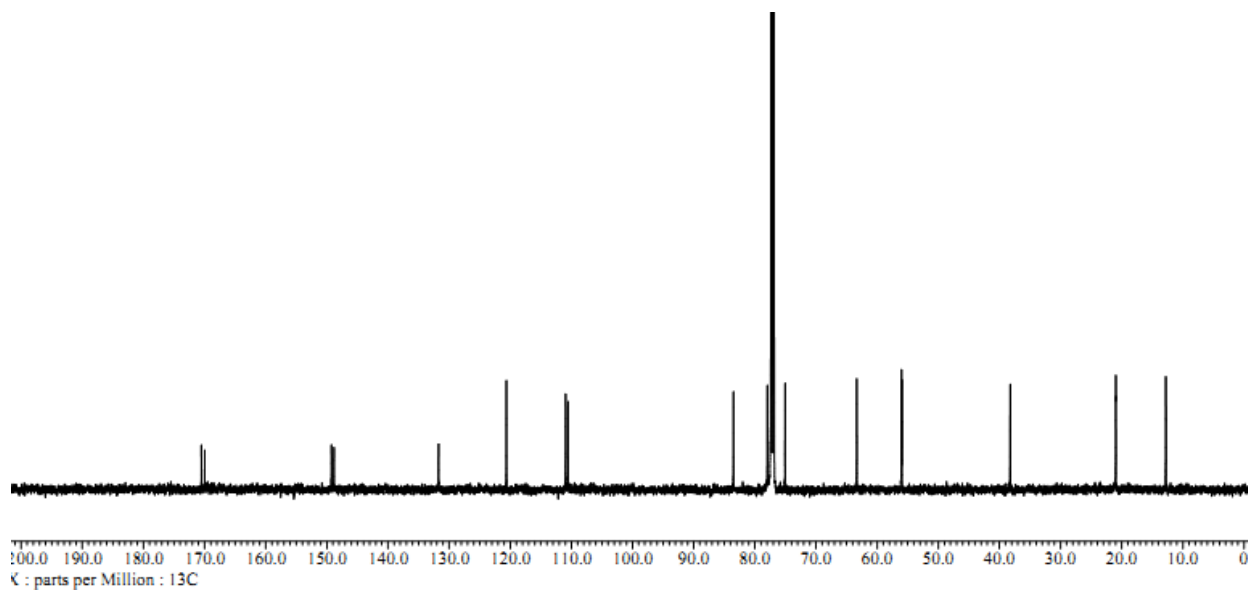

**Figure 44.2:** <sup>13</sup>C NMR (125 MHz, CDCl<sub>3</sub>) Spectrum of Compound 34b



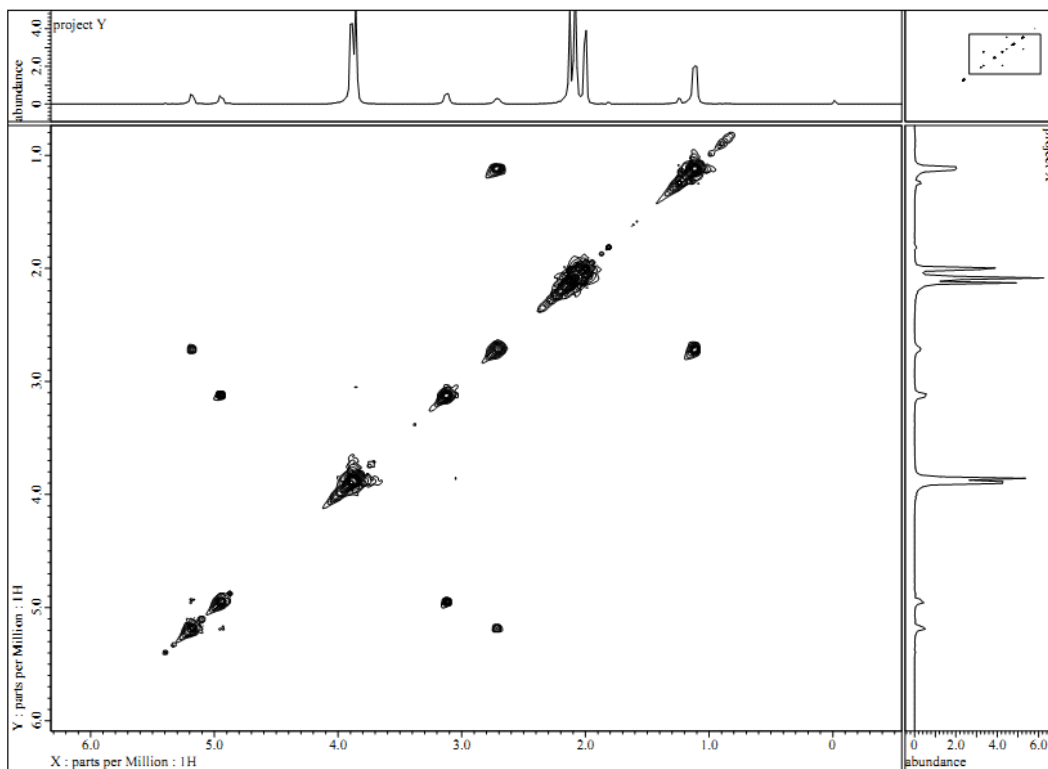

**Figure 44.3:**  $^1\text{H}$ - $^1\text{H}$  COSY Spectrum of Compound **34b**

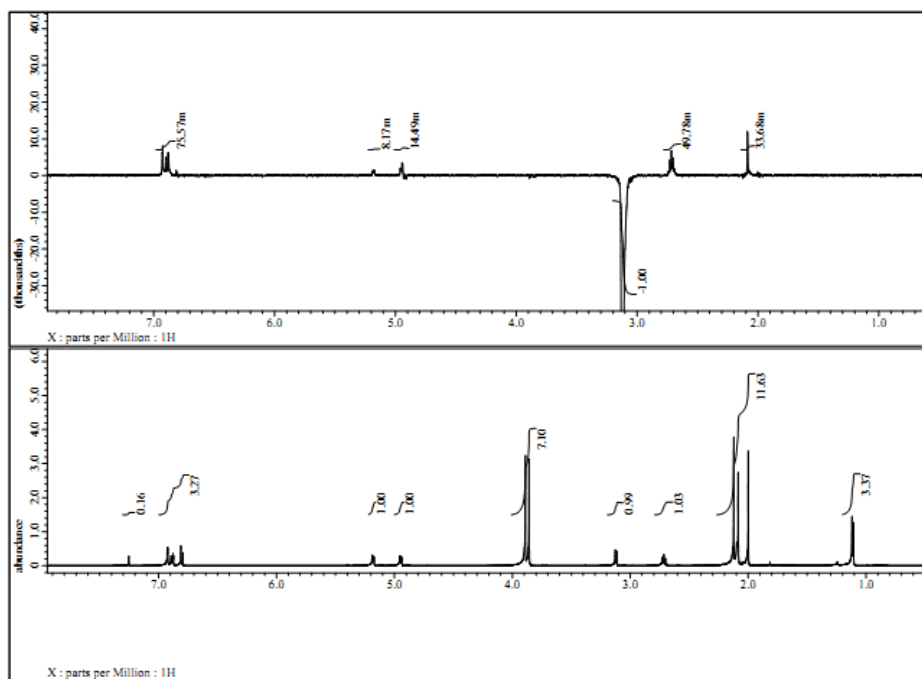

**Figure 44.4:** NOE irradiation of H-2 proton Spectrum of Compound **34b**

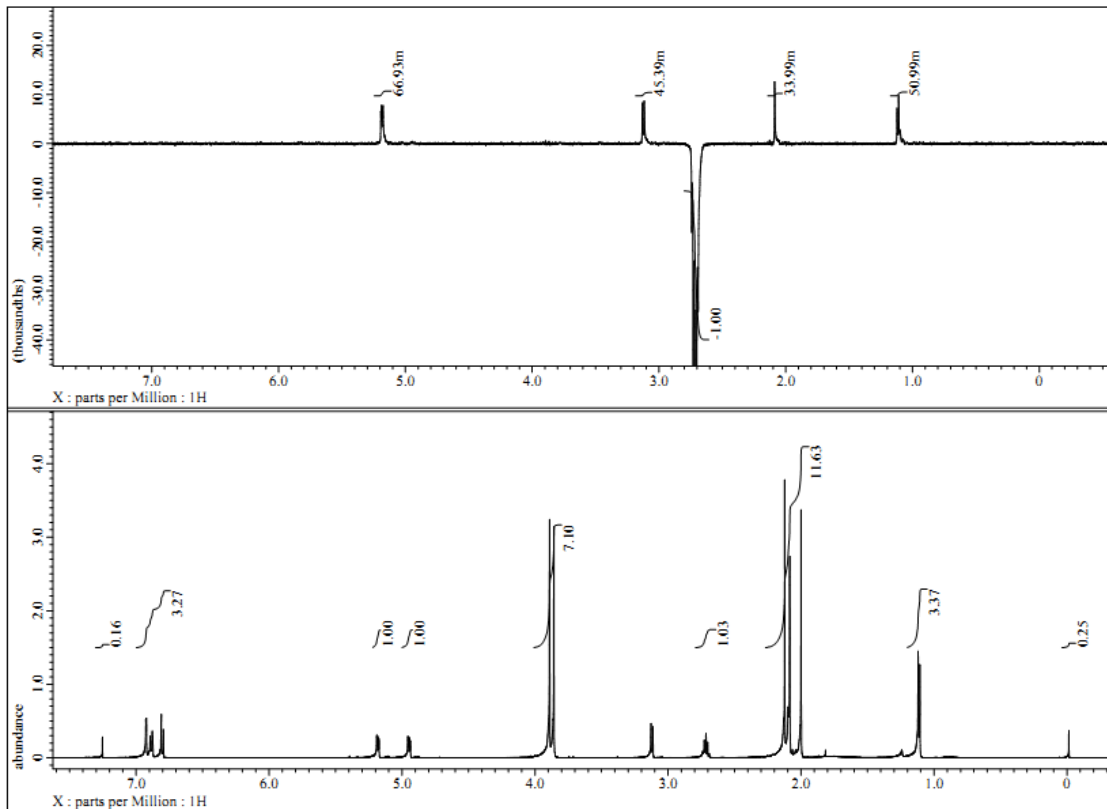

**Figure 44.5:** NOE irradiation of H-5 proton Spectrum of Compound **34b**

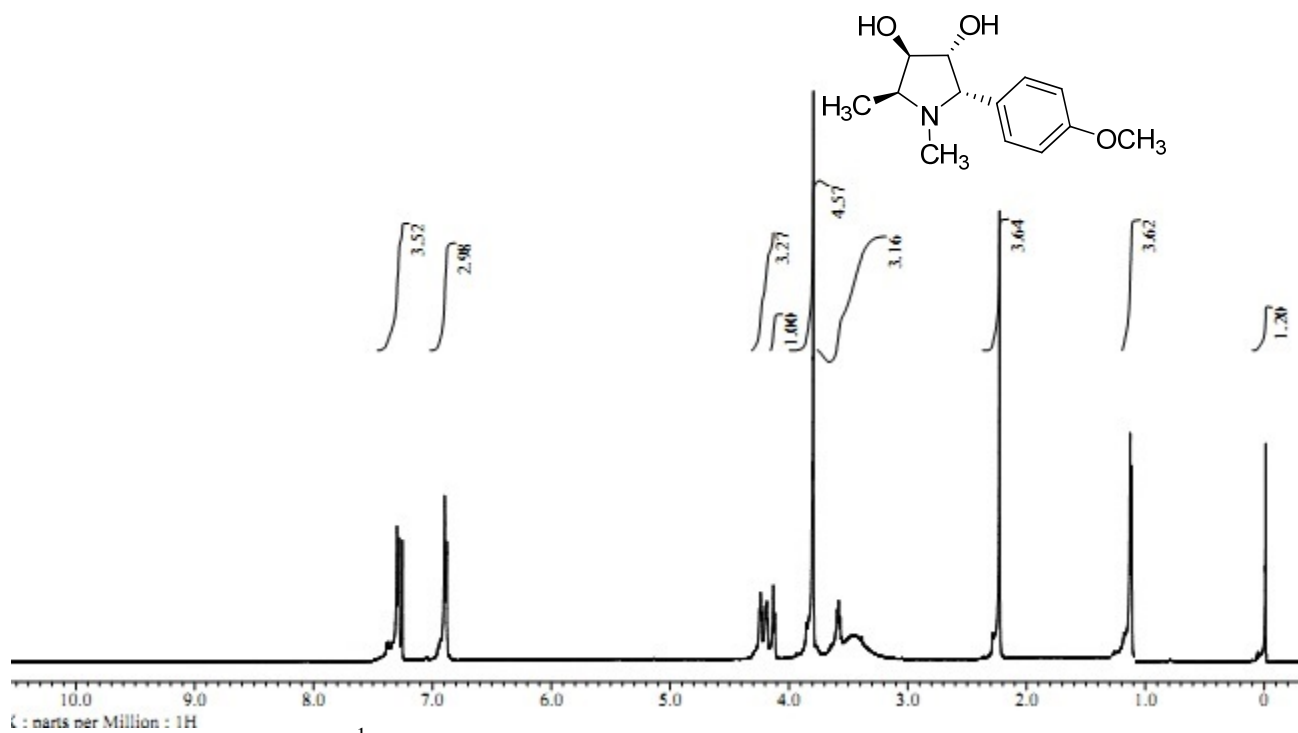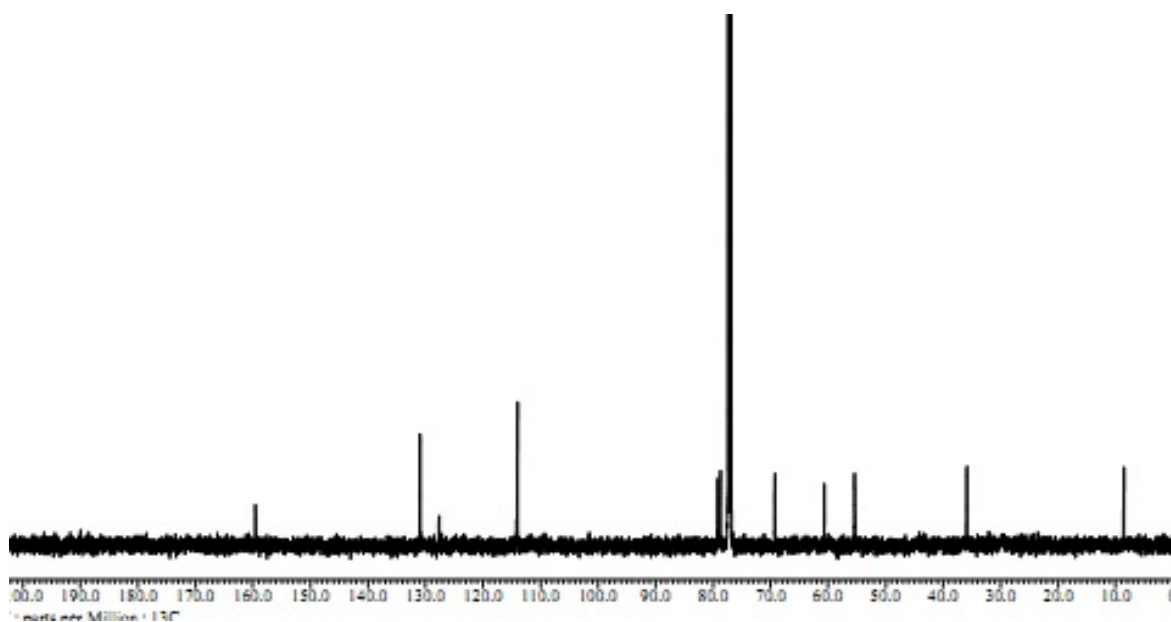

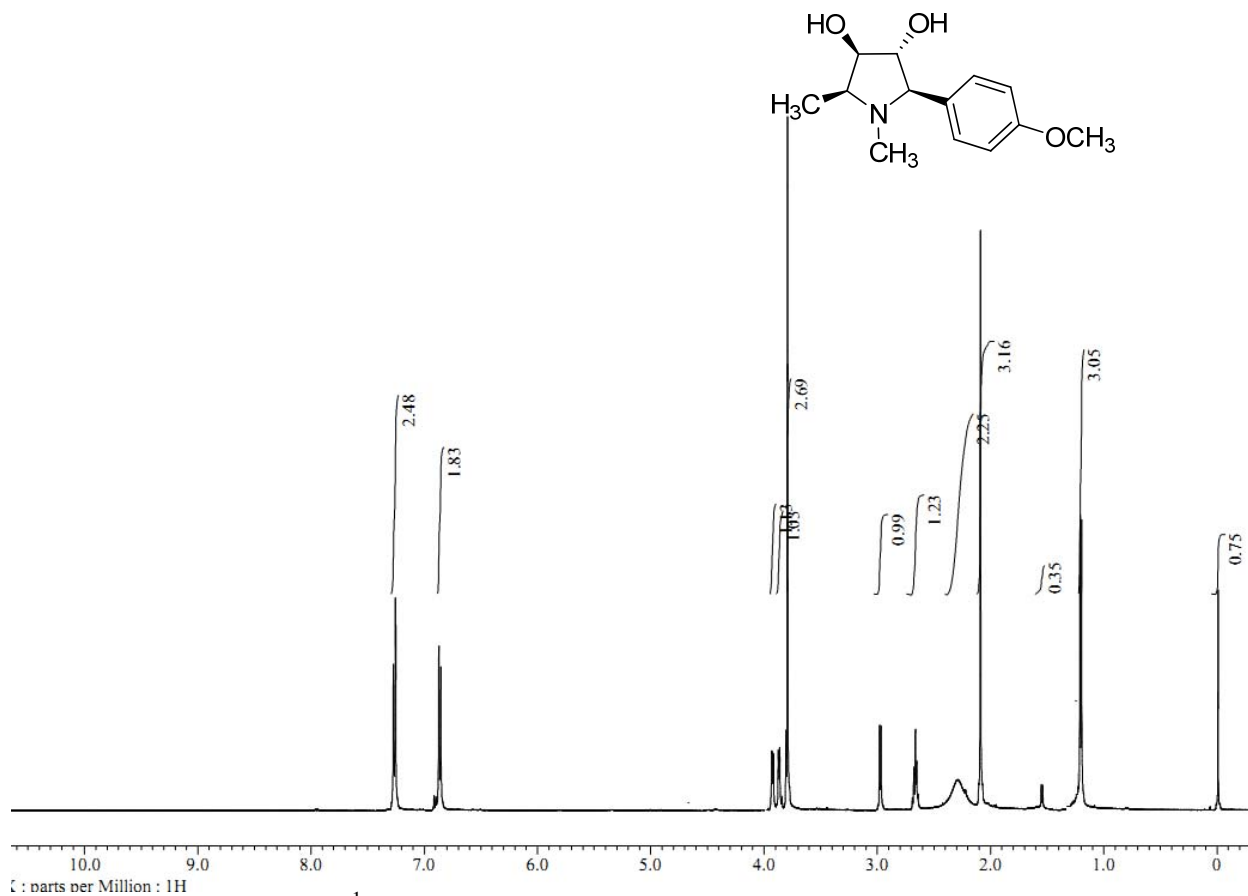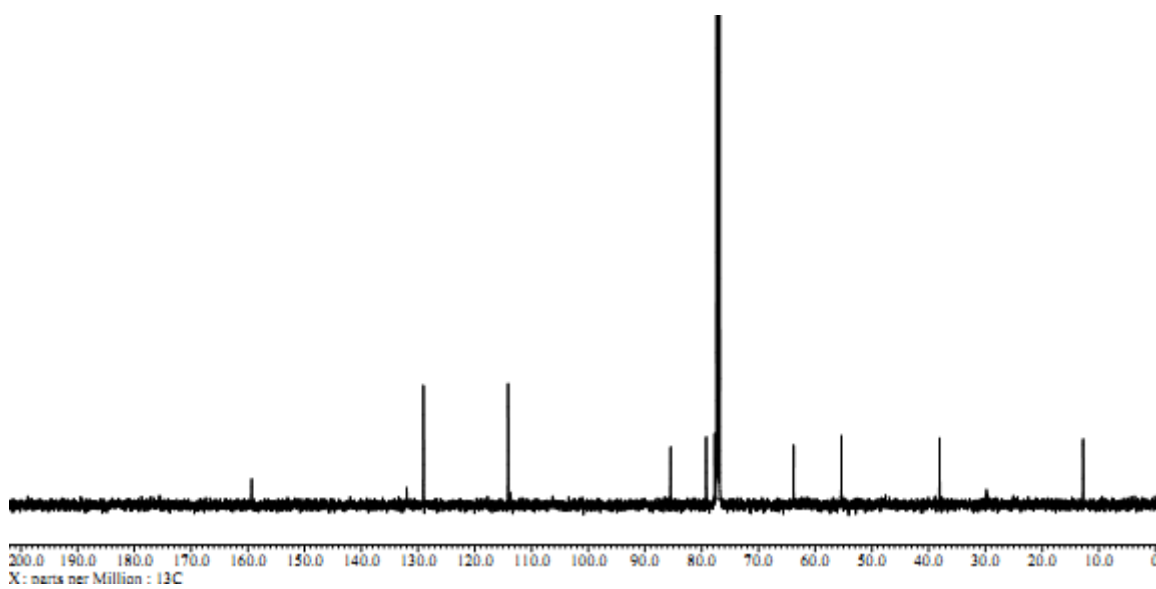

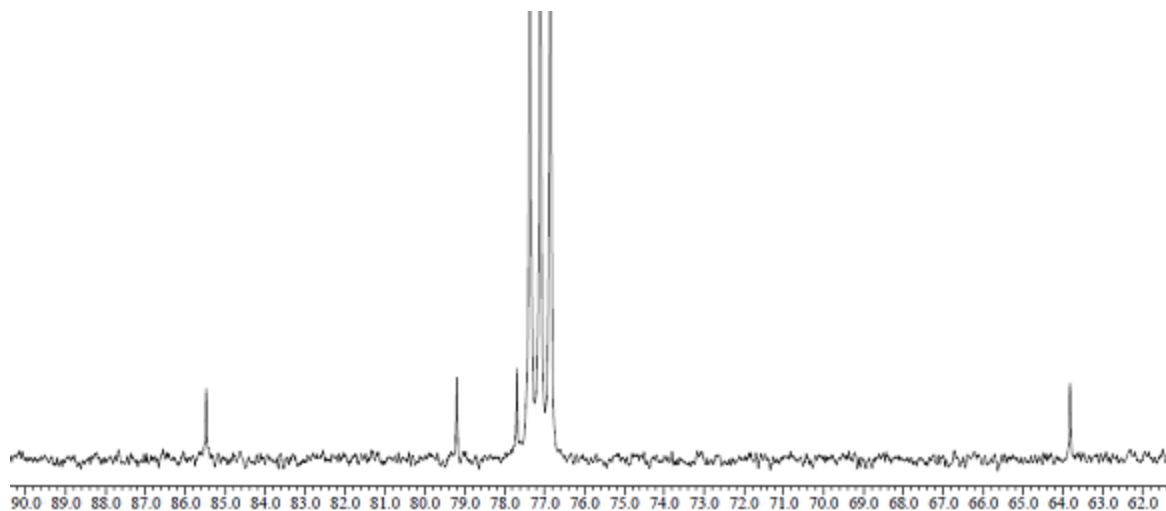

**Figure 46.3:** Expansion of  $^{13}\text{C}$  NMR (125 MHz,  $\text{CDCl}_3$ ) Spectrum of Compound **35b**

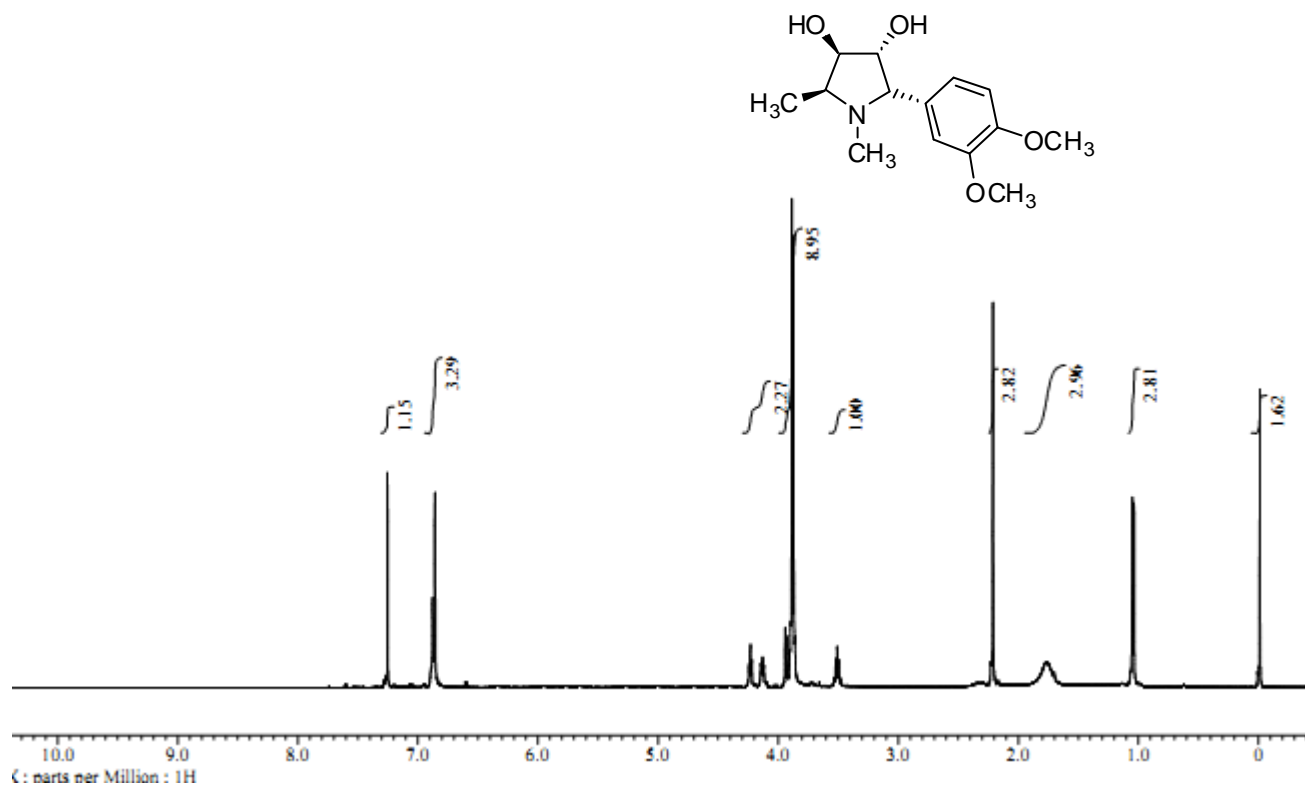

**Figure 47.1:**  $^1\text{H}$  NMR (500 MHz,  $\text{CDCl}_3$ ) Spectrum of Compound 36a

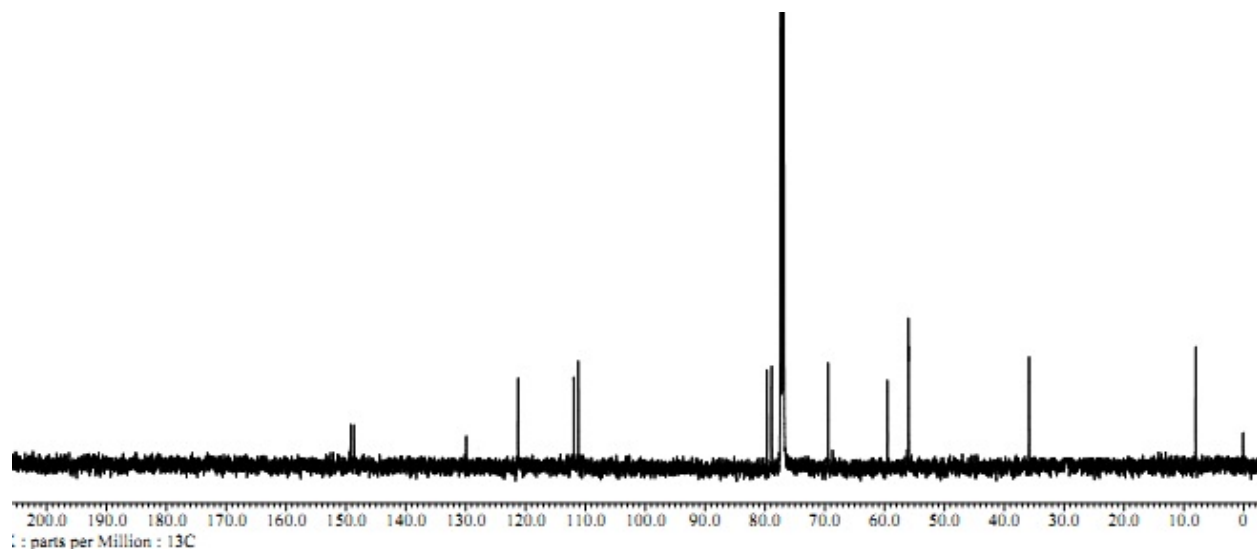

**Figure 47.2:**  $^{13}\text{C}$  NMR (125 MHz,  $\text{CDCl}_3$ ) Spectrum of Compound 36a

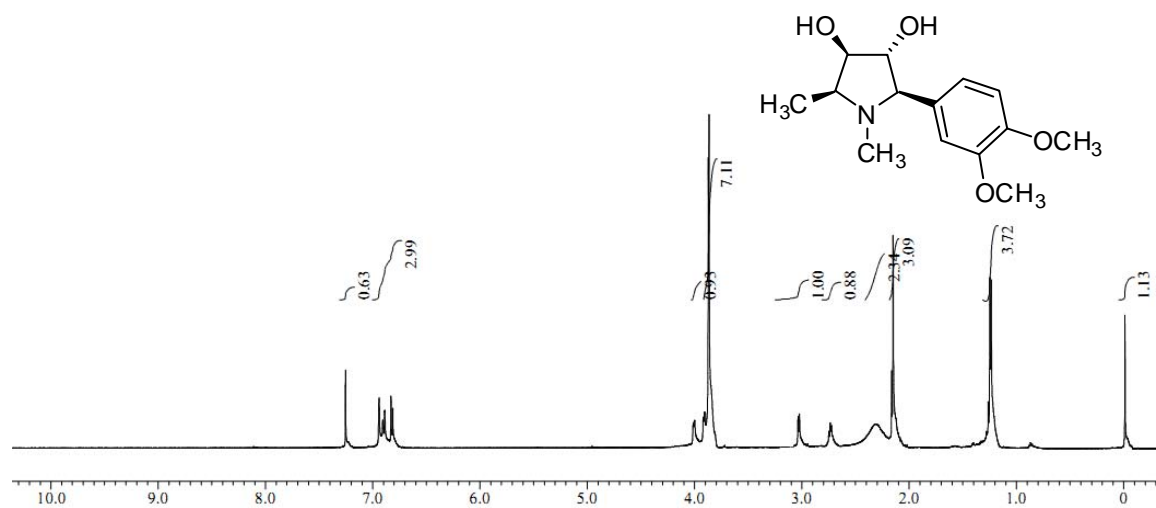

**Figure 48.1:** <sup>1</sup>H NMR (500 MHz, CDCl<sub>3</sub>) Spectrum of Compound **36b**

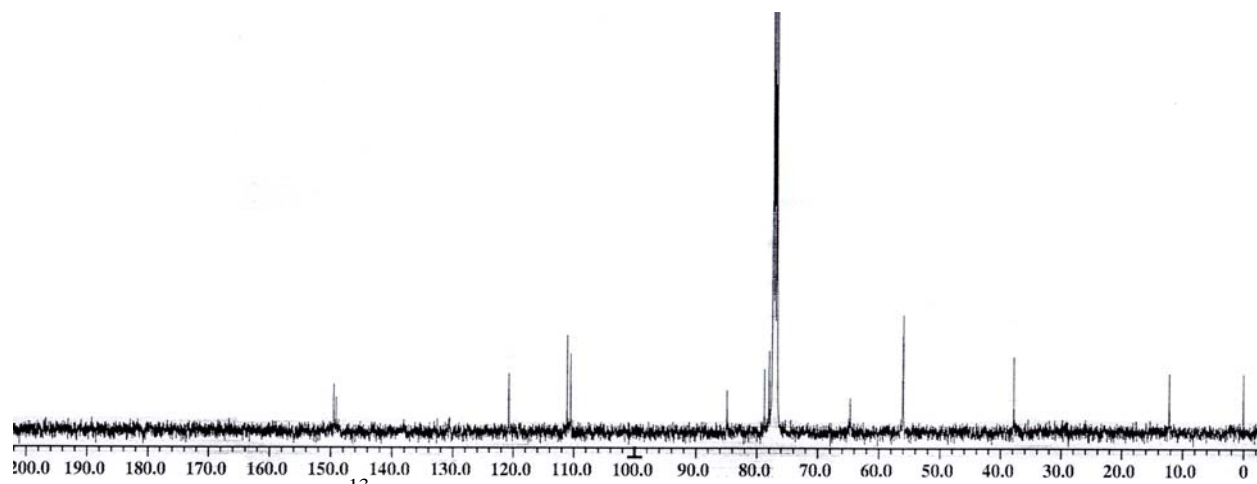

**Figure 48.2:** <sup>13</sup>C NMR (100 MHz, CDCl<sub>3</sub>) Spectrum of Compound **36b**

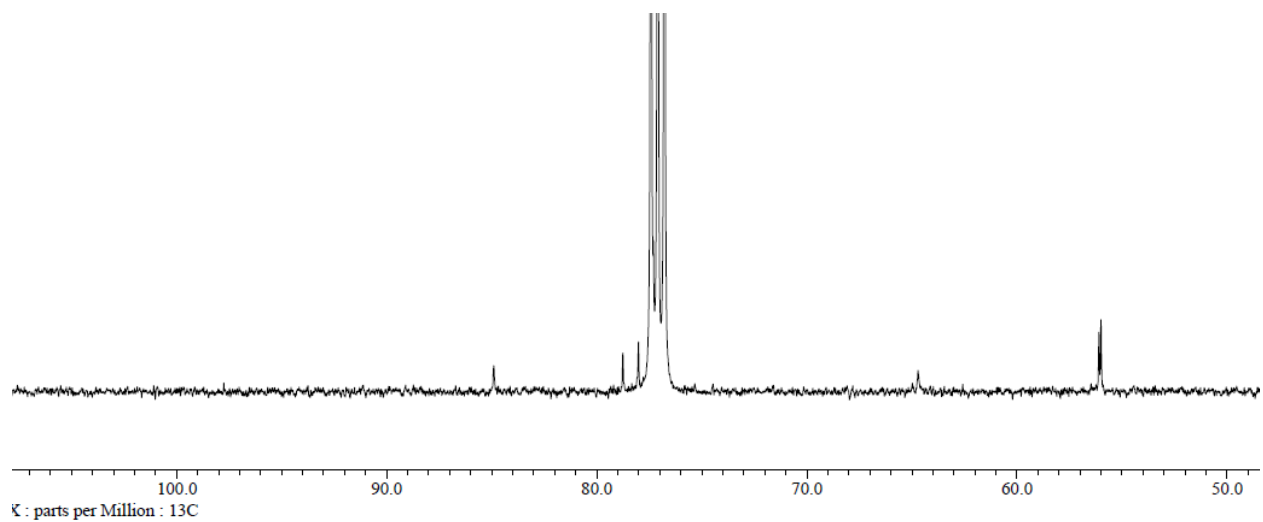

**Figure 48.3:** Expansion of  $^{13}\text{C}$  NMR (100 MHz,  $\text{CDCl}_3$ ) Spectrum of Compound **36b**
